# Supplementary material
Source: PubMed Central journal article supplement (PMC4391824)
Supplement: NIHMS676713-supplement-Supplemental_information.pdf [file NIHMS676713-supplement-Supplemental_information.pdf]

## Supplement Information

**Supplementary Figure 1.** The smooth muscle phenotype of cultured cells was confirmed (>97% purity) by immunohistochemistry with antibodies against smooth muscle  $\alpha$ -actin.

**Supplementary Figure 2.** Box plot of RMA normalized data

**Supplementary Table 1. All differentially expression genes in HPAH (A) and IPAH (B) compared with Control HPASMC.** The selection procedure was describe in the material and methods. The table was generated by R program. The table shows the entrez gene ID, gene symbol, gene description, the absolute expression level of all nine samples, the fold change of the HPAH and IPAH expression compared with CONTROL, and p-values of the expression changes.

**Supplementary Table 2. The 227 genes that expressed differently in HPAH and IPAH HPASMC compared with Normal cells.** The table showed the entrez gene ID, gene symbol, the fold change of mRNA expression in HPAH and IPAH samples compared with normal HPASMC, and the normalized expression value of control, HPAH and IPAH samples.

**Supplementary Table 3. Biological functions and diseases predicted by Ingenuity Pathway Analysis based on the differentially expressed genes in HPAH and IPAH vs control.** The Biological Functional Analysis™ identified the biological functions and/or diseases that were most significant to the data set. The 227 selected genes in table 1 were associated with a biological function in the Ingenuity knowledge base were considered for analysis. Fischer's exact test was used to calculate a p-value determining the probability that each biological function and/or disease assigned to that data set is due to chance alone. The molecules involved in those biological functions were also listed in the table. The molecules involved in those biological functions were also listed in the table. The identity of those molecules can be retrieved from **Supplementary Table 2.**

**Supplementary Table 4. Canonical signal transduction pathways predicted by Ingenuity Pathway Analysis based on the differentially expressed genes in HPAH and IPAH vs control.** Canonical pathways analysis identified the pathways from the Ingenuity Pathways Analysis™ library of canonical pathways that were most significant to the dataset. The 227 selected genes in table 1 were associated with a canonical pathway in the Ingenuity knowledge base were considered for analysis. The significance of the association between the dataset and the canonical pathway was determined as a p-value calculated by Fisher's exact test, a measure of the probability that the association between the proteins in the dataset and the canonical pathway is taking place by chance alone. The ratio is calculated as follows: number of genes in a given pathway that meet the cutoff criteria, divided by the total number of genes that make up that pathway and that are in the reference gene set. The molecules involved in those biological pathways were also listed in the table. The identity of those molecules can be retrieved from **Supplementary Table 2.**

**Supplementary Table 5. The list of genes predicted by Ingenuity Pathway Analysis that increase or affect cell proliferation.** The identity of those molecules can be retrieved from **Supplementary Table 2.**

**Supplementary Table 6. The downstream genes regulated by p53, Rb, FoxM1 and Myc which displayed differentiated expressional changes in HPAH and IPAH samples.**

**Supplementary Figure 1.** The smooth muscle phenotype of cultured cells was confirmed (>97% purity) by immunohistochemistry with antibodies against smooth muscle  $\alpha$ -actin.

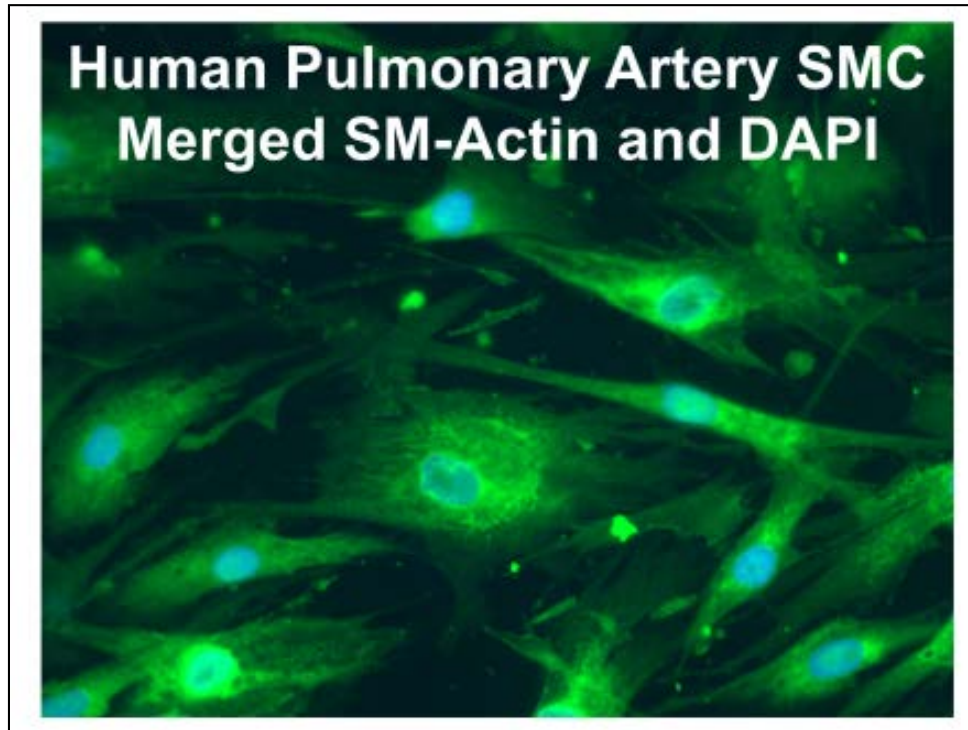

Supplementary Figure 2. Box plot of RMA normalized data

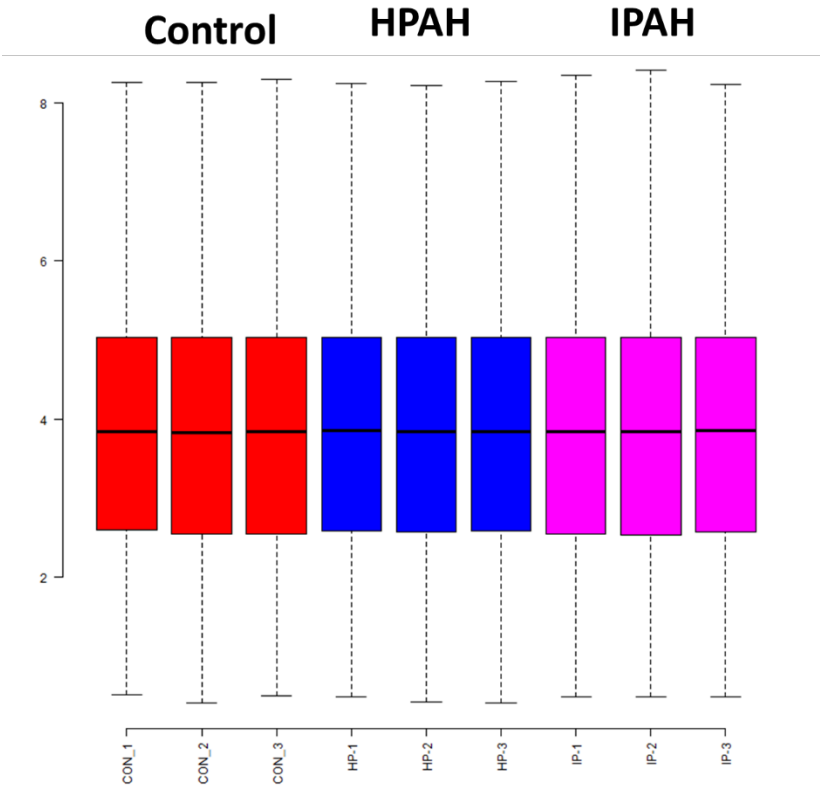

**Supplementary Table 1. All differentially expression genes in HPAH (A) and IPAH (B) compared with Control HPASMC.** The selection procedure was describe in the material and methods. The table was generated by R program. The table shows the entrez gene ID, gene symbol, gene description, the absolute expression level of all nine samples, the fold change of the HPAH and IPAH expression compared with CONTROL, and p-values of the expression changes.

**Supplementary Table 1A.**

| Entrez ID | symbol   | Fold Change | p value  | CONTR OL-1 | CONTR OL-2 | CONTR OL-3 | HPAH-1 | HPAH -2 | HPAH-3 |
|-----------|----------|-------------|----------|------------|------------|------------|--------|---------|--------|
| 2         | A2M      | -2.01       | 1.10E-03 | 879.90     | 707.98     | 886.20     | 416.93 | 431.41  | 380.11 |
| 55        | ACPP     | -2.54       | 1.16E-03 | 25.03      | 33.67      | 24.71      | 12.01  | 10.36   | 10.52  |
| 114       | ADCY8    | -2.04       | 2.00E-03 | 33.19      | 39.72      | 37.66      | 15.71  | 17.49   | 20.99  |
| 154       | ADRB2    | 2.09        | 2.18E-04 | 34.34      | 35.59      | 40.81      | 80.80  | 74.54   | 76.00  |
| 196       | AHR      | -1.59       | 2.01E-04 | 1377.36    | 1230.13    | 1351.21    | 818.73 | 838.87  | 829.20 |
| 230       | ALDOC    | -1.55       | 7.34E-03 | 107.46     | 143.62     | 122.99     | 82.42  | 81.31   | 76.91  |
| 306       | ANXA3    | 2.04        | 2.31E-04 | 17.70      | 17.66      | 14.89      | 34.37  | 34.25   | 34.11  |
| 395       | ARHGAP6  | -1.68       | 5.76E-03 | 108.73     | 86.26      | 118.08     | 62.10  | 63.53   | 60.52  |
| 414       | ARSD     | -1.58       | 1.16E-03 | 101.00     | 119.45     | 111.34     | 71.78  | 71.61   | 66.32  |
| 490       | ATP2B1   | -1.86       | 4.03E-04 | 562.04     | 636.91     | 627.81     | 301.05 | 340.30  | 340.74 |
| 534       | ATP6V1G2 | -2.35       | 2.20E-04 | 92.60      | 75.32      | 82.74      | 36.34  | 33.53   | 36.96  |
| 624       | BDKRB2   | -1.61       | 9.36E-03 | 237.39     | 269.06     | 191.80     | 143.78 | 147.05  | 143.57 |
| 627       | BDNF     | -2.08       | 1.29E-03 | 90.29      | 114.72     | 101.85     | 43.64  | 51.99   | 52.06  |
| 652       | BMP4     | 2.40        | 3.17E-05 | 99.53      | 101.53     | 88.93      | 236.87 | 230.11  | 230.41 |
| 659       | BMPR2    | -1.75       | 6.48E-04 | 757.34     | 636.74     | 721.71     | 381.63 | 414.56  | 411.16 |
| 684       | BST2     | 1.81        | 8.07E-03 | 11.63      | 13.47      | 9.43       | 20.94  | 23.20   | 18.45  |
| 701       | BUB1B    | 2.01        | 3.45E-04 | 28.03      | 24.33      | 29.91      | 56.43  | 54.28   | 54.95  |
| 920       | CD4      | -3.18       | 7.77E-05 | 59.54      | 49.91      | 51.98      | 15.41  | 17.62   | 17.66  |
| 978       | CDA      | -1.54       | 7.66E-03 | 52.43      | 40.75      | 51.78      | 32.09  | 32.25   | 30.02  |
| 983       | CDK1     | 1.98        | 3.75E-03 | 25.25      | 18.50      | 26.35      | 48.67  | 45.73   | 44.47  |
| 991       | CDC20    | 2.72        | 4.02E-03 | 81.44      | 47.78      | 76.25      | 200.27 | 182.50  | 175.48 |
| 1062      | CENPE    | 2.01        | 1.30E-03 | 29.50      | 23.72      | 31.70      | 57.00  | 57.21   | 56.08  |
| 1124      | CHN2     | 1.60        | 1.52E-03 | 11.34      | 12.11      | 13.68      | 19.10  | 19.47   | 20.89  |
| 1138      | CHRNA5   | 1.98        | 5.26E-03 | 4.95       | 6.54       | 6.25       | 13.71  | 11.22   | 10.15  |
| 1240      | CMKLR1   | 2.36        | 5.74E-03 | 42.21      | 28.79      | 49.58      | 92.06  | 101.05  | 92.02  |
| 1306      | COL15A1  | -3.05       | 1.63E-03 | 77.85      | 54.77      | 85.92      | 25.90  | 23.96   | 21.88  |
| 1364      | CLDN4    | 1.58        | 6.63E-03 | 17.45      | 13.43      | 17.24      | 24.36  | 25.00   | 26.79  |
| 1382      | CRABP2   | -2.32       | 5.62E-04 | 244.75     | 289.15     | 243.99     | 125.73 | 101.87  | 107.97 |
| 1429      | CRYZ     | -2.15       | 1.54E-03 | 384.26     | 439.39     | 342.73     | 159.61 | 179.97  | 202.71 |
| 1469      | CST1     | -4.77       | 2.44E-04 | 183.07     | 125.14     | 173.28     | 36.03  | 31.40   | 33.48  |
| 1512      | CTSH     | 3.57        | 1.48E-04 | 23.16      | 23.51      | 30.52      | 94.11  | 92.30   | 89.15  |
| 1612      | DAPK1    | 3.13        | 1.55E-04 | 21.15      | 19.47      | 24.19      | 70.85  | 71.04   | 60.65  |
| 1734      | DIO2     | 1.73        | 3.35E-03 | 30.34      | 27.65      | 32.98      | 49.78  | 60.23   | 47.75  |
| 1829      | DSG2     | -5.66       | 3.97E-06 | 19.77      | 22.37      | 19.10      | 3.57   | 3.69    | 3.56   |
| 1831      | TSC22D3  | 1.72        | 3.38E-04 | 64.82      | 69.83      | 62.66      | 120.51 | 106.55  | 113.22 |
| 1832      | DSP      | 1.68        | 4.59E-03 | 76.30      | 63.63      | 79.87      | 120.84 | 135.96  | 111.46 |
| 1903      | S1PR3    | -1.76       | 8.36E-04 | 655.80     | 566.30     | 585.29     | 356.01 | 359.36  | 313.69 |
| 1910      | EDNRB    | -7.62       | 4.90E-04 | 513.75     | 796.40     | 483.84     | 62.12  | 81.96   | 91.48  |
| 2047      | EPHB1    | 1.69        | 2.95E-05 | 30.46      | 31.27      | 31.79      | 51.72  | 51.32   | 54.92  |
| 2069      | EREG     | -6.88       | 6.81E-04 | 177.62     | 133.60     | 236.07     | 21.22  | 26.60   | 31.71  |
| 2078      | ERG      | 8.53        | 3.40E-03 | 37.06      | 12.53      | 36.89      | 233.87 | 262.48  | 241.19 |

|      |           |       |          |         |         |         |        |        |        |
|------|-----------|-------|----------|---------|---------|---------|--------|--------|--------|
| 2123 | EVI2A     | 2.99  | 1.44E-04 | 16.17   | 17.16   | 16.24   | 56.93  | 44.61  | 46.80  |
| 2151 | F2RL2     | -1.93 | 8.46E-04 | 1226.97 | 980.01  | 1174.37 | 558.76 | 607.44 | 582.01 |
| 2167 | FABP4     | -4.56 | 7.90E-03 | 35.44   | 14.11   | 29.28   | 6.64   | 4.82   | 5.81   |
| 2304 | FOXE1     | -2.69 | 2.54E-03 | 95.74   | 60.16   | 88.12   | 30.39  | 29.13  | 31.10  |
| 2487 | FRZB      | -1.59 | 9.18E-03 | 25.32   | 24.16   | 30.61   | 17.26  | 14.66  | 18.34  |
| 2539 | G6PD      | -1.51 | 6.64E-03 | 572.08  | 732.76  | 587.06  | 419.05 | 417.25 | 415.75 |
| 2596 | GAP43     | -1.54 | 5.93E-04 | 45.62   | 50.10   | 49.37   | 32.72  | 29.42  | 32.10  |
| 2635 | GBP3      | -1.84 | 1.25E-03 | 164.63  | 130.03  | 149.86  | 78.61  | 85.40  | 77.99  |
| 2662 | GDF10     | 1.53  | 6.03E-03 | 53.50   | 42.03   | 52.91   | 78.19  | 75.80  | 73.08  |
| 2791 | GNG11     | -1.72 | 8.59E-04 | 776.26  | 893.35  | 752.65  | 472.84 | 443.05 | 490.29 |
| 2846 | LPAR4     | 2.01  | 1.35E-03 | 21.48   | 17.83   | 22.54   | 44.48  | 42.35  | 37.44  |
| 2852 | GPER      | 1.55  | 6.16E-03 | 76.29   | 99.86   | 91.24   | 145.71 | 135.96 | 132.69 |
| 2898 | GRIK2     | -1.87 | 1.28E-03 | 140.39  | 172.19  | 134.58  | 81.48  | 78.81  | 78.55  |
| 2919 | CXCL1     | -2.48 | 6.66E-03 | 129.09  | 210.43  | 171.91  | 56.56  | 79.77  | 70.09  |
| 2920 | CXCL2     | -1.69 | 1.90E-03 | 29.92   | 25.87   | 24.90   | 14.52  | 16.25  | 16.91  |
| 2925 | GRPR      | 2.86  | 3.23E-03 | 29.34   | 20.55   | 34.55   | 84.02  | 87.65  | 69.46  |
| 2944 | GSTM1     | -8.90 | 7.25E-04 | 290.76  | 284.42  | 288.87  | 21.01  | 28.39  | 47.73  |
| 2949 | GSTM5     | -1.84 | 4.36E-03 | 188.17  | 252.94  | 188.73  | 120.79 | 107.69 | 113.51 |
| 2983 | GUCY1B3   | -1.96 | 8.58E-03 | 92.03   | 100.65  | 84.29   | 50.56  | 55.14  | 35.64  |
| 3018 | HIST1H2BB | 1.52  | 5.05E-03 | 18.57   | 16.12   | 20.80   | 27.60  | 28.94  | 27.55  |
| 3082 | HGF       | -3.80 | 1.01E-03 | 512.35  | 819.97  | 528.70  | 159.46 | 168.61 | 161.80 |
| 3107 | HLA-C     | -1.59 | 4.48E-04 | 1119.40 | 1256.62 | 1100.38 | 738.10 | 739.96 | 712.90 |
| 3108 | HLA-DMA   | -1.81 | 4.73E-05 | 166.84  | 176.63  | 178.90  | 100.72 | 94.70  | 93.43  |
| 3113 | HLA-DPA1  | -6.72 | 5.71E-05 | 108.87  | 121.69  | 103.19  | 18.08  | 13.56  | 17.99  |
| 3161 | HMMR      | 2.54  | 3.22E-03 | 11.97   | 9.11    | 15.38   | 30.90  | 30.80  | 30.84  |
| 3224 | HOXC8     | 1.52  | 9.28E-05 | 33.59   | 32.98   | 31.01   | 49.94  | 48.37  | 49.94  |
| 3357 | HTR2B     | 1.94  | 9.61E-04 | 27.50   | 22.55   | 27.07   | 50.04  | 53.25  | 46.06  |
| 3384 | ICAM2     | 2.00  | 5.15E-05 | 24.61   | 22.81   | 24.13   | 45.01  | 47.99  | 49.88  |
| 3397 | ID1       | 2.67  | 3.54E-03 | 147.20  | 91.89   | 147.63  | 367.64 | 317.50 | 348.66 |
| 3398 | ID2       | 2.76  | 2.73E-05 | 297.83  | 322.10  | 291.86  | 901.45 | 801.93 | 817.21 |
| 3399 | ID3       | 3.34  | 8.84E-04 | 58.31   | 92.13   | 73.61   | 260.31 | 230.92 | 256.90 |
| 3455 | IFNAR2    | -1.69 | 1.14E-03 | 73.27   | 85.65   | 72.27   | 47.55  | 42.74  | 46.18  |
| 3484 | IGFBP1    | 1.55  | 2.36E-03 | 41.55   | 35.62   | 36.89   | 53.97  | 60.44  | 62.30  |
| 3554 | IL1R1     | -1.50 | 3.48E-04 | 651.19  | 634.32  | 658.40  | 406.25 | 428.06 | 457.64 |
| 3566 | IL4R      | -1.72 | 1.85E-03 | 217.78  | 268.08  | 247.86  | 130.10 | 147.77 | 147.96 |
| 3627 | CXCL10    | -2.28 | 6.46E-05 | 6.39    | 7.38    | 7.21    | 3.12   | 2.97   | 3.12   |
| 3671 | ISLR      | 2.57  | 5.16E-06 | 215.15  | 221.33  | 208.23  | 577.31 | 534.54 | 547.05 |
| 3672 | ITGA1     | -2.91 | 1.12E-05 | 169.36  | 172.77  | 176.12  | 58.74  | 63.51  | 55.71  |
| 3775 | KCNK1     | 1.55  | 8.82E-04 | 34.22   | 36.97   | 39.03   | 54.07  | 56.93  | 60.35  |
| 3778 | KCNMA1    | 2.08  | 4.58E-04 | 145.88  | 180.85  | 149.67  | 332.31 | 319.33 | 337.16 |
| 3832 | KIF11     | 2.02  | 5.95E-03 | 50.41   | 33.77   | 50.68   | 92.54  | 90.63  | 89.10  |
| 3880 | KRT19     | 2.65  | 9.07E-03 | 84.90   | 45.81   | 89.27   | 198.04 | 192.51 | 192.39 |
| 3897 | L1CAM     | -1.56 | 7.30E-05 | 19.37   | 18.04   | 19.59   | 11.98  | 12.23  | 12.22  |
| 3918 | LAMC2     | 2.74  | 1.11E-04 | 15.14   | 17.46   | 14.49   | 46.23  | 41.64  | 41.38  |
| 3949 | LDLR      | -1.54 | 5.09E-03 | 520.54  | 445.23  | 552.10  | 302.83 | 348.19 | 336.59 |
| 3959 | LGALS3BP  | -1.58 | 3.39E-04 | 337.88  | 368.35  | 340.87  | 232.85 | 219.35 | 210.44 |
| 3976 | LIF       | -1.63 | 8.44E-03 | 86.14   | 87.97   | 107.49  | 49.73  | 61.64  | 61.72  |
| 4064 | CD180     | 10.04 | 1.53E-05 | 3.74    | 5.14    | 4.59    | 44.99  | 45.14  | 45.19  |
| 4065 | LY75      | 2.04  | 3.56E-04 | 4.05    | 3.73    | 4.41    | 8.11   | 8.95   | 7.80   |
| 4155 | MBP       | -1.58 | 7.41E-03 | 25.15   | 20.12   | 20.11   | 14.90  | 12.53  | 14.04  |
| 4217 | MAP3K5    | -1.55 | 1.54E-03 | 194.64  | 226.09  | 208.12  | 135.98 | 142.90 | 125.60 |
| 4239 | MFAP4     | -2.30 | 3.96E-03 | 478.62  | 693.82  | 449.87  | 242.32 | 234.68 | 228.71 |
| 4241 | MFI2      | 4.10  | 8.41E-06 | 38.67   | 39.45   | 35.56   | 147.88 | 166.78 | 151.45 |

|      |          |       |          |        |        |        |        |        |        |
|------|----------|-------|----------|--------|--------|--------|--------|--------|--------|
| 4605 | MYBL2    | 1.64  | 1.12E-03 | 46.39  | 42.81  | 52.22  | 79.40  | 75.88  | 76.40  |
| 4629 | MYH11    | 2.20  | 8.65E-03 | 27.62  | 17.91  | 27.03  | 55.65  | 59.44  | 44.38  |
| 4675 | NAP1L3   | 1.77  | 1.89E-04 | 32.13  | 35.19  | 34.94  | 59.59  | 57.33  | 63.90  |
| 4751 | NEK2     | 1.80  | 7.97E-04 | 33.47  | 26.99  | 31.27  | 56.02  | 53.94  | 54.70  |
| 4756 | NEO1     | -1.62 | 1.07E-04 | 320.55 | 331.98 | 310.51 | 198.04 | 206.84 | 189.72 |
| 4826 | NNAT     | 1.53  | 1.44E-03 | 36.33  | 32.69  | 39.34  | 55.94  | 54.17  | 55.47  |
| 4857 | NOVA1    | -1.59 | 7.47E-04 | 58.11  | 52.84  | 56.32  | 37.33  | 35.29  | 32.34  |
| 4884 | NPTX1    | -2.43 | 4.35E-03 | 392.77 | 292.83 | 441.67 | 155.59 | 130.57 | 177.85 |
| 4897 | NRCAM    | 3.54  | 3.31E-03 | 19.72  | 11.95  | 21.82  | 58.30  | 74.50  | 56.53  |
| 4920 | ROR2     | 1.83  | 1.60E-04 | 76.84  | 68.25  | 75.23  | 140.35 | 134.14 | 128.96 |
| 4923 | NTSR1    | -3.41 | 5.01E-04 | 55.41  | 44.07  | 56.70  | 14.88  | 13.12  | 17.77  |
| 4940 | OAS3     | 1.82  | 4.34E-04 | 21.89  | 18.39  | 19.90  | 38.32  | 36.21  | 35.17  |
| 4958 | OMD      | 5.69  | 2.47E-04 | 7.33   | 4.94   | 7.49   | 34.43  | 39.91  | 38.04  |
| 5026 | P2RX5    | 2.24  | 9.13E-04 | 54.50  | 44.34  | 58.36  | 127.07 | 114.36 | 111.06 |
| 5064 | PALM     | 2.28  | 4.59E-04 | 68.16  | 52.93  | 62.93  | 133.06 | 141.48 | 144.42 |
| 5080 | PAX6     | 1.60  | 2.05E-03 | 12.14  | 10.68  | 11.55  | 16.44  | 19.34  | 19.37  |
| 5126 | PCSK2    | -8.09 | 1.71E-04 | 168.02 | 119.13 | 151.97 | 20.26  | 14.17  | 19.82  |
| 5154 | PDGFA    | 1.81  | 1.27E-03 | 40.12  | 33.66  | 38.59  | 63.65  | 74.88  | 65.18  |
| 5163 | PDK1     | -1.51 | 8.28E-04 | 545.56 | 479.09 | 519.52 | 339.47 | 326.74 | 356.42 |
| 5179 | PENK     | 2.66  | 3.07E-05 | 142.31 | 125.74 | 139.77 | 363.04 | 377.09 | 344.37 |
| 5265 | SERPINA1 | 1.73  | 2.06E-03 | 9.35   | 10.84  | 8.68   | 15.65  | 17.97  | 16.24  |
| 5318 | PKP2     | 3.58  | 1.00E-05 | 13.47  | 11.65  | 12.82  | 46.02  | 43.69  | 45.99  |
| 5347 | PLK1     | 2.52  | 5.73E-03 | 77.47  | 47.32  | 81.89  | 182.76 | 169.70 | 167.76 |
| 5352 | PLOD2    | -1.58 | 1.83E-03 | 462.52 | 378.35 | 443.15 | 268.93 | 267.08 | 276.08 |
| 5383 | PMS2L5   | 1.82  | 2.54E-04 | 98.19  | 103.25 | 110.73 | 196.61 | 176.95 | 195.82 |
| 5519 | PPP2R1B  | -1.68 | 4.67E-04 | 444.20 | 397.53 | 426.82 | 234.43 | 257.55 | 265.02 |
| 5602 | MAPK10   | -1.58 | 3.09E-03 | 173.51 | 190.61 | 173.27 | 112.56 | 126.13 | 100.59 |
| 5603 | MAPK13   | 1.84  | 1.40E-05 | 30.12  | 28.32  | 28.93  | 53.28  | 52.30  | 55.17  |
| 5669 | PSG1     | 7.48  | 2.76E-03 | 71.01  | 24.10  | 50.81  | 375.16 | 357.74 | 358.12 |
| 5738 | PTGFRN   | -1.80 | 1.75E-03 | 102.38 | 81.68  | 99.08  | 53.81  | 54.57  | 48.82  |
| 5764 | PTN      | -2.09 | 2.81E-03 | 118.55 | 86.88  | 121.00 | 49.20  | 53.32  | 53.76  |
| 5798 | PTPRN    | -1.51 | 2.16E-03 | 44.56  | 45.14  | 53.31  | 31.67  | 31.85  | 31.45  |
| 5874 | RAB27B   | -2.01 | 8.08E-03 | 40.45  | 61.01  | 40.94  | 24.01  | 22.15  | 24.71  |
| 5924 | RASGRF2  | -1.55 | 3.93E-03 | 123.62 | 153.79 | 125.06 | 86.31  | 88.90  | 84.43  |
| 5999 | RGS4     | 1.74  | 7.49E-03 | 368.05 | 264.75 | 365.26 | 596.71 | 597.13 | 543.69 |
| 6000 | RGS7     | -2.53 | 1.79E-04 | 16.90  | 13.80  | 16.40  | 6.42   | 6.35   | 5.87   |
| 6091 | ROBO1    | -1.82 | 3.79E-03 | 303.49 | 405.28 | 308.31 | 186.21 | 195.04 | 177.39 |
| 6092 | ROBO2    | -2.15 | 7.63E-05 | 37.15  | 33.60  | 35.61  | 16.60  | 17.45  | 15.44  |
| 6275 | S100A4   | -1.50 | 4.28E-04 | 384.75 | 397.71 | 434.77 | 274.89 | 265.36 | 269.35 |
| 6354 | CCL7     | -1.56 | 3.98E-03 | 32.73  | 31.59  | 29.90  | 19.66  | 22.79  | 17.86  |
| 6364 | CCL20    | -2.53 | 9.66E-04 | 10.75  | 10.20  | 13.67  | 4.40   | 5.08   | 4.23   |
| 6387 | CXCL12   | -1.65 | 5.42E-03 | 181.42 | 133.32 | 161.93 | 97.04  | 96.52  | 95.15  |
| 6423 | SFRP2    | 6.82  | 4.99E-06 | 11.28  | 13.15  | 11.42  | 81.67  | 77.12  | 85.80  |
| 6474 | SHOX2    | -1.89 | 2.11E-03 | 38.98  | 30.01  | 37.80  | 19.35  | 17.62  | 19.59  |
| 6480 | ST6GAL1  | 2.16  | 4.47E-04 | 55.77  | 46.77  | 55.02  | 120.83 | 115.41 | 103.64 |
| 6513 | SLC2A1   | -1.65 | 2.49E-05 | 646.52 | 642.79 | 636.43 | 405.55 | 382.75 | 376.89 |
| 6542 | SLC7A2   | 2.77  | 3.15E-03 | 15.11  | 19.60  | 18.56  | 40.64  | 63.31  | 43.70  |
| 6649 | SOD3     | -1.77 | 4.10E-03 | 262.53 | 205.82 | 250.90 | 151.23 | 132.77 | 123.02 |
| 6712 | SPTBN2   | 1.54  | 3.52E-04 | 26.07  | 23.82  | 23.81  | 38.76  | 38.68  | 36.07  |
| 6751 | SSTR1    | -1.75 | 6.64E-03 | 162.38 | 224.68 | 188.84 | 99.39  | 111.49 | 118.35 |
| 6857 | SYT1     | -2.03 | 3.14E-03 | 99.22  | 77.09  | 111.31 | 47.47  | 45.63  | 48.41  |
| 6907 | TBL1X    | -1.62 | 6.63E-04 | 136.12 | 139.52 | 143.60 | 78.53  | 91.61  | 89.41  |
| 6941 | TCF19    | 1.57  | 3.56E-03 | 36.24  | 42.89  | 44.06  | 69.87  | 61.15  | 62.44  |

|      |           |       |          |         |         |         |        |        |        |
|------|-----------|-------|----------|---------|---------|---------|--------|--------|--------|
| 6943 | TCF21     | -1.56 | 7.68E-03 | 1028.50 | 1364.56 | 1119.79 | 710.64 | 783.75 | 755.49 |
| 7042 | TGFB2     | 1.71  | 1.26E-04 | 121.98  | 136.09  | 128.15  | 216.73 | 215.08 | 228.02 |
| 7043 | TGFB3     | 1.95  | 8.70E-04 | 70.27   | 64.33   | 82.99   | 139.08 | 144.69 | 141.07 |
| 7049 | TGFBR3    | -1.56 | 2.01E-04 | 596.95  | 547.89  | 555.80  | 349.66 | 366.33 | 376.04 |
| 7100 | TLR5      | 1.59  | 9.22E-03 | 10.50   | 9.85    | 8.53    | 17.69  | 14.31  | 13.90  |
| 7127 | TNFAIP2   | -1.69 | 8.06E-03 | 76.19   | 106.23  | 79.98   | 53.19  | 50.34  | 51.81  |
| 7130 | TNFAIP6   | -2.08 | 6.10E-04 | 507.88  | 590.67  | 469.50  | 236.23 | 263.28 | 253.82 |
| 7223 | TRPC4     | -3.56 | 6.01E-04 | 60.41   | 86.01   | 69.63   | 20.46  | 22.82  | 17.47  |
| 7272 | TTK       | 1.91  | 9.84E-04 | 20.00   | 17.58   | 22.63   | 37.06  | 38.31  | 39.47  |
| 7292 | TNFSF4    | -1.60 | 1.95E-03 | 20.09   | 20.32   | 19.55   | 14.02  | 12.26  | 11.23  |
| 7357 | UGCG      | -1.78 | 1.90E-04 | 224.49  | 250.47  | 226.61  | 133.46 | 135.89 | 124.74 |
| 7421 | VDR       | 1.84  | 1.21E-03 | 78.87   | 63.61   | 77.96   | 138.92 | 138.00 | 127.93 |
| 7422 | VEGFA     | -1.51 | 2.38E-03 | 292.27  | 320.72  | 274.03  | 180.92 | 197.98 | 207.04 |
| 7447 | VSNL1     | 1.70  | 2.90E-03 | 9.34    | 7.96    | 8.12    | 13.03  | 16.25  | 14.04  |
| 7472 | WNT2      | 2.29  | 2.25E-03 | 11.50   | 13.91   | 11.41   | 33.37  | 23.70  | 27.31  |
| 7543 | ZFX       | -1.57 | 1.07E-03 | 171.27  | 202.36  | 175.93  | 115.07 | 116.71 | 119.15 |
| 7980 | TFPI2     | -3.40 | 7.02E-04 | 682.46  | 894.80  | 715.96  | 186.85 | 223.03 | 263.94 |
| 8029 | CUBN      | -1.76 | 4.66E-05 | 18.58   | 19.99   | 18.50   | 10.53  | 10.76  | 11.14  |
| 8226 | HDHD1     | -1.82 | 1.55E-04 | 236.72  | 234.14  | 252.33  | 125.09 | 131.40 | 141.62 |
| 8228 | PNPLA4    | -1.54 | 5.16E-04 | 130.13  | 124.14  | 119.93  | 79.28  | 77.05  | 86.59  |
| 8233 | ZRSR2     | -1.54 | 6.81E-03 | 77.84   | 69.30   | 65.58   | 50.82  | 46.87  | 40.31  |
| 8332 | HIST1H2AL | 1.71  | 4.51E-04 | 47.14   | 41.99   | 48.23   | 82.03  | 74.69  | 78.01  |
| 8344 | HIST1H2BE | 1.51  | 1.62E-03 | 45.35   | 47.69   | 50.01   | 76.85  | 65.75  | 73.11  |
| 8345 | HIST1H2BH | 1.87  | 5.79E-04 | 186.34  | 163.43  | 185.42  | 355.25 | 304.36 | 340.26 |
| 8354 | HIST1H3I  | 1.67  | 1.88E-04 | 443.54  | 435.00  | 477.52  | 793.36 | 731.14 | 736.08 |
| 8357 | HIST1H3H  | 1.77  | 2.53E-03 | 167.02  | 134.93  | 178.97  | 287.54 | 276.60 | 288.72 |
| 8359 | HIST1H4A  | 1.53  | 5.61E-03 | 24.38   | 18.66   | 21.94   | 33.47  | 33.92  | 32.06  |
| 8364 | HIST1H4C  | 1.81  | 8.69E-04 | 349.05  | 412.81  | 432.48  | 706.68 | 746.03 | 714.47 |
| 8406 | SRPX      | -1.92 | 7.52E-04 | 1163.92 | 941.95  | 1078.88 | 588.04 | 526.41 | 546.26 |
| 8418 | CMAH      | 1.74  | 1.29E-03 | 20.42   | 17.67   | 22.15   | 36.27  | 35.03  | 33.70  |
| 8507 | ENC1      | -2.23 | 2.14E-04 | 84.10   | 80.74   | 88.57   | 33.77  | 39.67  | 40.35  |
| 8532 | CPZ       | 2.09  | 1.88E-05 | 43.17   | 44.91   | 47.82   | 93.30  | 94.76  | 96.26  |
| 8544 | PIR       | -3.99 | 5.05E-05 | 66.79   | 81.29   | 66.58   | 16.78  | 18.09  | 18.92  |
| 8612 | PPAP2C    | -1.84 | 5.59E-03 | 207.65  | 286.03  | 209.71  | 125.51 | 135.81 | 121.88 |
| 8641 | PCDHGB4   | -1.76 | 2.72E-04 | 385.26  | 440.45  | 404.77  | 245.12 | 225.31 | 229.35 |
| 8673 | VAMP8     | -1.97 | 1.01E-03 | 54.12   | 51.84   | 62.14   | 31.81  | 26.86  | 26.82  |
| 8788 | DLK1      | 6.97  | 1.03E-06 | 32.41   | 30.37   | 28.40   | 211.33 | 208.35 | 215.94 |
| 8825 | LIN7A     | -1.64 | 1.40E-03 | 53.69   | 52.32   | 59.84   | 31.61  | 36.90  | 32.49  |
| 8838 | WISP3     | 2.66  | 8.05E-05 | 12.00   | 12.82   | 10.61   | 32.86  | 31.00  | 30.52  |
| 8844 | KSR1      | -1.59 | 6.41E-04 | 121.31  | 108.34  | 126.86  | 74.42  | 73.29  | 75.92  |
| 8969 | HIST1H2AG | 1.84  | 2.68E-03 | 340.10  | 277.08  | 371.17  | 646.96 | 585.18 | 585.92 |
| 8988 | HSPB3     | -1.74 | 4.15E-03 | 15.74   | 18.42   | 17.61   | 8.38   | 10.95  | 10.45  |
| 9021 | SOCS3     | -1.60 | 1.59E-03 | 67.64   | 76.98   | 62.49   | 43.30  | 42.52  | 43.56  |
| 9079 | LDB2      | -1.78 | 4.75E-04 | 399.61  | 346.11  | 398.53  | 215.04 | 224.17 | 203.52 |
| 9096 | TBX18     | -1.60 | 4.83E-04 | 196.60  | 214.89  | 198.47  | 134.51 | 127.91 | 119.12 |
| 9122 | SLC16A4   | -1.60 | 9.15E-04 | 193.86  | 176.54  | 194.57  | 121.69 | 123.52 | 107.86 |
| 9133 | CCNB2     | 1.99  | 9.20E-03 | 63.26   | 42.65   | 68.96   | 121.44 | 113.15 | 112.78 |
| 9134 | CCNE2     | 1.68  | 4.13E-03 | 48.59   | 59.23   | 61.13   | 91.38  | 88.15  | 104.43 |
| 9194 | SLC16A7   | -1.64 | 2.80E-04 | 244.26  | 270.88  | 269.38  | 159.27 | 166.40 | 153.19 |
| 9227 | LRAT      | 2.76  | 4.88E-03 | 7.32    | 5.48    | 6.72    | 13.33  | 17.80  | 22.82  |
| 9368 | SLC9A3R1  | 1.58  | 1.32E-03 | 212.89  | 174.85  | 198.17  | 308.21 | 307.18 | 310.57 |
| 9455 | HOMER2    | 1.55  | 7.13E-04 | 16.26   | 16.74   | 18.42   | 25.86  | 28.06  | 25.81  |
| 9493 | KIF23     | 1.58  | 4.07E-04 | 106.26  | 102.36  | 117.28  | 168.01 | 171.23 | 174.47 |

|       |          |       |          |         |        |         |        |        |        |
|-------|----------|-------|----------|---------|--------|---------|--------|--------|--------|
| 9518  | GDF15    | -1.98 | 3.31E-04 | 246.09  | 285.31 | 282.49  | 133.82 | 130.33 | 146.61 |
| 9536  | PTGES    | -1.62 | 4.81E-03 | 161.05  | 160.48 | 128.01  | 87.70  | 91.54  | 99.10  |
| 9568  | GABBR2   | 2.12  | 5.06E-03 | 321.87  | 220.13 | 341.05  | 611.76 | 637.30 | 622.60 |
| 9585  | KIF20B   | 1.85  | 5.39E-03 | 18.16   | 14.23  | 20.89   | 32.47  | 34.20  | 31.83  |
| 9674  | KIAA0040 | 4.59  | 1.51E-04 | 10.26   | 13.49  | 11.71   | 46.82  | 55.57  | 60.38  |
| 9732  | DOCK4    | -1.72 | 6.22E-04 | 181.63  | 172.41 | 197.45  | 99.41  | 113.81 | 107.47 |
| 9770  | RASSF2   | 1.61  | 1.10E-03 | 105.74  | 118.75 | 97.65   | 170.87 | 173.48 | 174.74 |
| 9829  | DNAJC6   | -1.58 | 6.09E-03 | 37.94   | 50.65  | 42.52   | 27.08  | 28.44  | 27.31  |
| 9837  | GIN51    | 1.59  | 4.14E-03 | 43.43   | 38.83  | 50.11   | 68.77  | 67.25  | 73.79  |
| 9890  | LPPR4    | -6.70 | 3.04E-03 | 193.72  | 83.52  | 190.48  | 24.90  | 24.85  | 20.09  |
| 9906  | SLC35E2  | -1.99 | 2.96E-03 | 237.62  | 288.39 | 241.54  | 151.49 | 120.13 | 113.92 |
| 9934  | P2RY14   | 2.24  | 3.27E-03 | 8.77    | 8.76   | 11.56   | 18.58  | 21.34  | 25.35  |
| 9953  | HS3ST3B1 | -2.53 | 5.08E-03 | 172.52  | 285.83 | 188.29  | 79.13  | 84.36  | 92.46  |
| 10076 | PTPRU    | 2.38  | 8.33E-04 | 32.87   | 39.85  | 28.60   | 80.12  | 82.71  | 78.77  |
| 10216 | PRG4     | 2.06  | 1.64E-07 | 9.25    | 9.32   | 9.28    | 18.80  | 19.25  | 19.37  |
| 10324 | KBTBD10  | 2.17  | 7.67E-03 | 15.84   | 25.29  | 21.63   | 38.57  | 48.80  | 49.10  |
| 10350 | ABCA9    | -1.53 | 1.98E-04 | 28.24   | 30.01  | 30.03   | 20.25  | 18.78  | 18.77  |
| 10403 | NDC80    | 1.87  | 6.13E-03 | 28.07   | 19.75  | 28.71   | 47.82  | 47.66  | 47.72  |
| 10439 | OLFM1    | 1.70  | 5.20E-04 | 67.20   | 60.09  | 68.25   | 103.71 | 115.87 | 111.93 |
| 10460 | TACC3    | 1.72  | 1.25E-03 | 25.71   | 23.47  | 28.63   | 47.35  | 41.92  | 44.91  |
| 10630 | PDPN     | 2.78  | 4.19E-04 | 132.67  | 97.17  | 119.57  | 340.53 | 320.91 | 310.26 |
| 10635 | RAD51AP1 | 1.58  | 2.04E-04 | 19.72   | 20.54  | 21.54   | 33.47  | 30.95  | 33.02  |
| 10733 | PLK4     | 1.61  | 5.01E-04 | 29.70   | 28.04  | 32.59   | 49.24  | 47.00  | 49.14  |
| 10982 | MAPRE2   | 1.59  | 5.54E-05 | 436.68  | 419.21 | 417.27  | 678.66 | 699.23 | 649.67 |
| 11033 | ADAP1    | 1.64  | 7.38E-03 | 21.81   | 16.68  | 21.98   | 35.46  | 30.66  | 33.12  |
| 11075 | STMN2    | -5.10 | 6.27E-04 | 1572.29 | 929.85 | 1464.56 | 253.31 | 263.28 | 261.40 |
| 11080 | DNAJB4   | 1.58  | 6.09E-03 | 409.15  | 521.82 | 459.86  | 661.23 | 781.72 | 751.08 |
| 11096 | ADAMTS5  | -1.68 | 3.55E-04 | 181.73  | 201.49 | 185.75  | 118.51 | 114.03 | 105.57 |
| 11112 | HIBADH   | -1.54 | 4.57E-03 | 424.21  | 333.64 | 382.07  | 256.73 | 233.34 | 248.42 |
| 11118 | BTN3A2   | -2.08 | 2.18E-03 | 58.93   | 47.24  | 50.85   | 29.31  | 23.78  | 22.29  |
| 11170 | FAM107A  | 1.59  | 4.07E-04 | 58.32   | 53.11  | 54.16   | 86.92  | 83.24  | 92.80  |
| 11185 | INMT     | -1.70 | 6.52E-04 | 150.73  | 179.41 | 175.79  | 99.22  | 98.89  | 99.01  |
| 11199 | ANXA10   | 2.90  | 7.84E-03 | 8.15    | 16.45  | 9.55    | 35.44  | 28.51  | 35.01  |
| 11320 | MGAT4A   | 1.72  | 4.31E-03 | 4.85    | 5.79   | 5.30    | 9.58   | 10.05  | 7.81   |
| 22795 | NID2     | -1.63 | 2.10E-04 | 522.06  | 512.69 | 478.97  | 320.14 | 314.95 | 292.68 |
| 22837 | COBLL1   | 2.08  | 4.47E-04 | 94.76   | 82.66  | 101.82  | 181.41 | 202.06 | 196.15 |
| 22854 | NTNG1    | 2.17  | 7.41E-05 | 63.38   | 61.49  | 71.36   | 143.74 | 139.65 | 141.59 |
| 22875 | ENPP4    | 1.50  | 2.79E-03 | 27.94   | 23.87  | 26.90   | 36.84  | 39.09  | 42.30  |
| 22881 | ANKRD6   | 1.58  | 4.39E-03 | 45.36   | 40.32  | 49.38   | 63.87  | 75.68  | 73.36  |
| 23017 | FAIM2    | -2.57 | 3.65E-04 | 92.05   | 115.61 | 104.37  | 44.25  | 40.13  | 36.86  |
| 23043 | TNIK     | 1.54  | 2.86E-03 | 113.76  | 97.46  | 120.27  | 175.78 | 170.22 | 163.31 |
| 23136 | EPB41L3  | -3.78 | 5.72E-04 | 178.20  | 131.28 | 197.09  | 45.33  | 40.44  | 48.16  |
| 23150 | FRMD4B   | 2.84  | 2.77E-03 | 21.03   | 13.72  | 22.83   | 55.20  | 50.77  | 57.81  |
| 23231 | SEL1L3   | -2.14 | 4.24E-03 | 186.18  | 269.36 | 182.78  | 101.51 | 99.40  | 98.03  |
| 23255 | KIAA0802 | -1.62 | 1.47E-05 | 79.37   | 82.62  | 79.88   | 50.91  | 49.86  | 48.41  |
| 23397 | NCAPH    | 1.98  | 3.62E-05 | 33.69   | 34.38  | 32.84   | 70.54  | 65.45  | 63.52  |
| 23446 | SLC44A1  | -1.55 | 1.88E-03 | 326.76  | 377.39 | 311.23  | 214.61 | 224.54 | 216.62 |
| 23460 | ABCA6    | -2.09 | 9.09E-03 | 71.77   | 111.22 | 70.56   | 41.27  | 41.58  | 38.62  |
| 23554 | TSPAN12  | -2.79 | 3.87E-03 | 23.01   | 37.26  | 22.54   | 10.35  | 9.87   | 9.44   |
| 23566 | LPAR3    | -2.49 | 6.73E-03 | 32.69   | 48.29  | 30.10   | 16.84  | 12.25  | 15.56  |
| 23596 | OPN3     | -1.59 | 1.08E-04 | 80.13   | 83.86  | 80.61   | 50.05  | 53.94  | 49.47  |
| 23671 | TMEFF2   | -1.83 | 5.02E-03 | 21.06   | 19.20  | 22.57   | 10.58  | 13.76  | 9.96   |
| 23705 | CADM1    | 1.84  | 6.46E-04 | 72.81   | 59.67  | 70.04   | 128.50 | 120.71 | 123.55 |



|       |          |       |          |         |         |         |        |        |        |
|-------|----------|-------|----------|---------|---------|---------|--------|--------|--------|
| 23743 | BHMT2    | -1.52 | 5.16E-03 | 70.07   | 70.61   | 68.55   | 52.86  | 44.01  | 41.01  |
| 23767 | FLRT3    | -4.03 | 4.75E-03 | 504.32  | 240.85  | 428.22  | 83.25  | 97.55  | 110.31 |
| 23768 | FLRT2    | -2.57 | 6.22E-05 | 384.61  | 340.92  | 392.32  | 136.64 | 152.16 | 145.71 |
| 25758 | C11orf41 | 2.81  | 3.39E-03 | 23.39   | 17.47   | 30.95   | 73.01  | 64.53  | 64.52  |
| 25791 | NGEF     | 1.62  | 7.55E-05 | 23.60   | 21.97   | 22.44   | 37.43  | 35.36  | 37.61  |
| 25878 | MXRA5    | -1.81 | 2.07E-03 | 194.87  | 232.52  | 180.14  | 114.24 | 116.52 | 104.00 |
| 25903 | OLFML2B  | 1.76  | 2.10E-03 | 57.20   | 71.46   | 60.01   | 120.42 | 104.34 | 107.74 |
| 25924 | MYRIP    | 1.90  | 5.44E-03 | 20.42   | 14.07   | 18.63   | 30.96  | 34.48  | 35.26  |
| 25945 | PVRL3    | -1.54 | 5.41E-03 | 435.63  | 545.64  | 456.11  | 289.23 | 322.21 | 323.58 |
| 25984 | KRT23    | 1.65  | 1.55E-03 | 15.04   | 13.09   | 15.32   | 22.15  | 23.89  | 25.66  |
| 26011 | ODZ4     | -1.60 | 1.96E-04 | 60.01   | 67.21   | 63.05   | 40.67  | 38.69  | 39.32  |
| 26018 | LRIG1    | -1.67 | 8.98E-03 | 200.13  | 267.05  | 200.09  | 123.65 | 144.81 | 130.42 |
| 26025 | PCDHGA12 | -2.39 | 1.48E-04 | 106.54  | 117.74  | 103.14  | 49.98  | 44.46  | 42.67  |
| 27063 | ANKRD1   | 3.49  | 2.69E-03 | 28.19   | 16.51   | 29.99   | 90.42  | 89.69  | 80.29  |
| 27254 | CSDC2    | -1.54 | 6.91E-04 | 103.60  | 106.43  | 96.47   | 68.50  | 68.80  | 61.84  |
| 27286 | SRPX2    | -1.66 | 2.03E-03 | 281.22  | 293.75  | 276.85  | 195.86 | 158.87 | 159.57 |
| 28638 | TRBC2    | 3.51  | 1.27E-03 | 16.66   | 10.92   | 13.52   | 56.04  | 40.09  | 48.01  |
| 28755 | TRAC     | 1.53  | 3.19E-03 | 8.45    | 7.49    | 9.38    | 13.16  | 12.41  | 13.05  |
| 29089 | UBE2T    | 1.52  | 2.49E-03 | 61.95   | 65.53   | 75.21   | 106.08 | 97.99  | 104.29 |
| 29128 | UHRF1    | 1.59  | 1.58E-03 | 70.42   | 78.35   | 85.72   | 128.41 | 119.11 | 124.76 |
| 29798 | C2orf27A | -2.32 | 5.63E-04 | 71.00   | 76.62   | 76.82   | 34.31  | 35.09  | 27.25  |
| 29906 | ST8SIA5  | 1.59  | 3.40E-04 | 40.57   | 38.67   | 42.64   | 64.15  | 61.51  | 68.06  |
| 29922 | NME7     | -1.55 | 1.15E-03 | 33.38   | 37.46   | 36.70   | 21.80  | 24.89  | 22.84  |
| 29941 | PKN3     | 1.56  | 1.65E-04 | 28.82   | 30.45   | 29.91   | 48.91  | 44.65  | 45.41  |
| 29953 | TRHDE    | -2.83 | 1.40E-04 | 122.28  | 101.23  | 123.13  | 40.45  | 43.36  | 38.49  |
| 51200 | CPA4     | 2.57  | 5.88E-03 | 165.89  | 97.27   | 169.34  | 365.04 | 377.40 | 367.26 |
| 51299 | NRN1     | 1.74  | 6.52E-04 | 11.81   | 12.36   | 13.65   | 20.79  | 23.58  | 21.36  |
| 51384 | WNT16    | -2.72 | 3.22E-04 | 137.75  | 134.17  | 169.91  | 50.34  | 58.43  | 53.91  |
| 51514 | DTL      | 1.59  | 5.52E-03 | 92.88   | 115.84  | 98.41   | 177.84 | 147.89 | 161.27 |
| 51703 | ACSL5    | 1.77  | 4.11E-03 | 29.48   | 23.70   | 32.32   | 47.86  | 53.64  | 49.86  |
| 51752 | ERAP1    | -1.54 | 4.14E-03 | 138.10  | 116.91  | 138.82  | 89.80  | 88.18  | 77.38  |
| 51816 | CECR1    | 2.02  | 3.20E-03 | 13.52   | 16.77   | 11.35   | 27.77  | 27.86  | 28.37  |
| 54443 | ANLN     | 2.36  | 8.74E-03 | 148.25  | 94.52   | 176.18  | 333.89 | 322.44 | 330.74 |
| 54541 | DDIT4    | -2.02 | 4.54E-03 | 69.82   | 47.12   | 55.14   | 30.32  | 28.17  | 26.51  |
| 54674 | LRRN3    | -2.71 | 5.06E-05 | 544.23  | 606.03  | 548.79  | 198.36 | 226.77 | 202.80 |
| 54733 | SLC35F2  | 2.10  | 1.06E-03 | 22.20   | 29.47   | 28.18   | 55.81  | 56.92  | 54.99  |
| 54757 | FAM20A   | -2.79 | 1.09E-03 | 86.61   | 129.68  | 99.96   | 38.75  | 38.55  | 36.23  |
| 54852 | PAQR5    | -1.60 | 8.57E-03 | 239.60  | 196.20  | 268.33  | 138.23 | 154.16 | 146.31 |
| 54861 | SNRK     | 1.64  | 6.75E-03 | 222.93  | 216.18  | 216.45  | 295.49 | 382.12 | 400.25 |
| 54874 | FNBP1L   | 1.82  | 5.87E-03 | 66.12   | 58.20   | 83.43   | 125.40 | 136.21 | 117.25 |
| 54960 | GEMIN8   | -1.61 | 3.85E-04 | 101.07  | 95.65   | 89.92   | 61.00  | 60.60  | 56.05  |
| 54970 | TTC12    | -1.55 | 2.94E-03 | 38.15   | 46.30   | 38.57   | 26.12  | 25.61  | 27.72  |
| 54986 | ULK4     | 1.89  | 7.25E-05 | 23.58   | 24.30   | 24.65   | 44.20  | 44.10  | 49.11  |
| 55022 | PID1     | -1.81 | 6.55E-04 | 200.52  | 233.89  | 209.07  | 114.19 | 113.40 | 128.61 |
| 55062 | WIPI1    | -1.54 | 6.81E-04 | 1083.18 | 1207.44 | 1039.34 | 713.90 | 722.64 | 727.99 |
| 55117 | SLC6A15  | -6.96 | 1.91E-03 | 84.43   | 185.91  | 90.02   | 17.02  | 15.84  | 18.90  |
| 55166 | CENPQ    | 1.95  | 3.05E-03 | 27.15   | 37.40   | 30.43   | 58.67  | 58.58  | 67.53  |
| 55215 | FANCI    | 1.52  | 3.42E-04 | 65.67   | 59.36   | 66.79   | 98.16  | 96.99  | 96.77  |
| 55240 | STEAP3   | -1.51 | 2.21E-03 | 234.39  | 265.73  | 223.12  | 162.65 | 150.46 | 164.53 |
| 55258 | THNSL2   | -2.08 | 2.12E-04 | 62.74   | 71.10   | 70.01   | 31.00  | 31.69  | 35.42  |
| 55276 | PGM2     | 1.90  | 2.25E-03 | 218.01  | 164.48  | 215.10  | 365.69 | 390.23 | 381.77 |
| 55351 | STK32B   | -1.60 | 2.14E-03 | 49.10   | 43.51   | 53.63   | 28.95  | 31.30  | 31.34  |
| 55355 | HJURP    | 1.53  | 5.00E-03 | 66.56   | 52.10   | 63.98   | 96.12  | 91.22  | 92.92  |

|       |                |       |          |        |        |        |        |        |        |
|-------|----------------|-------|----------|--------|--------|--------|--------|--------|--------|
| 55388 | MCM10          | 1.56  | 3.84E-03 | 33.32  | 40.43  | 39.04  | 61.52  | 53.63  | 61.16  |
| 55504 | TNFRSF19       | -1.73 | 3.17E-05 | 152.61 | 142.28 | 153.33 | 87.26  | 87.25  | 84.56  |
| 55540 | IL17RB         | 1.83  | 2.87E-03 | 27.41  | 37.39  | 33.71  | 58.88  | 63.12  | 58.65  |
| 55691 | FRMD4A         | -1.53 | 5.71E-03 | 58.76  | 72.63  | 60.82  | 38.23  | 44.10  | 42.91  |
| 55723 | ASF1B          | 1.58  | 3.70E-03 | 97.43  | 97.01  | 113.59 | 178.12 | 148.00 | 159.31 |
| 55790 | CSGALNAC<br>T1 | -1.67 | 2.67E-04 | 73.31  | 81.42  | 73.78  | 43.56  | 45.45  | 47.59  |
| 55816 | DOK5           | 1.91  | 6.10E-03 | 179.31 | 123.40 | 176.94 | 300.97 | 295.36 | 321.72 |
| 55859 | BEX1           | -3.92 | 5.96E-05 | 70.38  | 58.10  | 68.22  | 18.22  | 16.52  | 15.38  |
| 55930 | MYO5C          | 1.69  | 4.42E-03 | 8.53   | 8.39   | 6.86   | 12.52  | 15.04  | 12.73  |
| 55959 | SULF2          | 2.24  | 3.45E-04 | 44.53  | 44.40  | 37.33  | 90.61  | 102.12 | 90.00  |
| 55971 | BAIAP2L1       | 1.54  | 7.97E-04 | 120.71 | 123.92 | 121.75 | 200.54 | 192.44 | 171.67 |
| 56062 | KLHL4          | 2.05  | 2.05E-04 | 4.39   | 4.80   | 4.59   | 9.27   | 10.30  | 8.71   |
| 56109 | PCDHGA6        | -1.60 | 5.13E-03 | 15.08  | 19.93  | 16.34  | 10.91  | 10.46  | 10.66  |
| 56112 | PCDHGA3        | -2.64 | 2.05E-04 | 47.22  | 38.82  | 46.71  | 17.42  | 17.37  | 15.46  |
| 56113 | PCDHGA2        | -1.53 | 6.74E-03 | 43.26  | 39.75  | 41.66  | 25.80  | 31.54  | 24.19  |
| 56125 | PCDHB11        | 1.55  | 2.81E-03 | 17.38  | 17.40  | 17.17  | 29.95  | 23.81  | 26.80  |
| 56265 | CPXM1          | 1.66  | 6.20E-03 | 19.06  | 21.55  | 16.05  | 34.09  | 29.19  | 30.69  |
| 56477 | CCL28          | 1.63  | 4.05E-04 | 57.19  | 53.37  | 62.21  | 95.56  | 94.00  | 92.54  |
| 56947 | MFF            | -1.77 | 3.94E-04 | 977.73 | 821.42 | 888.98 | 518.29 | 505.34 | 497.54 |
| 56992 | KIF15          | 1.56  | 1.00E-02 | 14.22  | 10.97  | 12.97  | 20.50  | 17.58  | 21.44  |
| 57057 | TBX20          | 3.70  | 2.24E-05 | 8.41   | 8.78   | 7.86   | 32.23  | 32.35  | 27.98  |
| 57088 | PLSCR4         | -1.64 | 2.05E-04 | 246.37 | 256.11 | 248.67 | 150.72 | 163.06 | 143.90 |
| 57094 | CPA6           | -2.34 | 7.13E-03 | 41.03  | 25.47  | 41.46  | 16.25  | 14.92  | 14.95  |
| 57125 | PLXDC1         | 2.77  | 2.04E-05 | 44.52  | 43.70  | 40.91  | 128.06 | 115.01 | 115.16 |
| 57181 | SLC39A10       | -1.51 | 7.78E-04 | 301.46 | 328.78 | 327.54 | 198.83 | 224.07 | 212.53 |
| 57381 | RHOJ           | 1.72  | 1.16E-03 | 125.58 | 104.48 | 115.50 | 213.49 | 190.33 | 190.26 |
| 57405 | SPC25          | 1.66  | 3.48E-04 | 19.05  | 17.52  | 20.47  | 31.50  | 31.53  | 31.57  |
| 57412 | AS3MT          | -1.66 | 5.39E-03 | 80.82  | 91.58  | 70.09  | 53.43  | 45.16  | 47.15  |
| 57480 | PLEKHG1        | -1.69 | 2.62E-03 | 19.14  | 24.63  | 20.89  | 13.09  | 13.08  | 12.21  |
| 57484 | RNF150         | -2.20 | 2.84E-04 | 128.65 | 131.95 | 120.21 | 53.64  | 64.90  | 54.83  |
| 57575 | PCDH10         | -1.60 | 2.75E-04 | 89.27  | 87.66  | 92.08  | 55.59  | 59.75  | 52.67  |
| 57580 | PREX1          | 1.84  | 1.02E-04 | 24.20  | 23.57  | 24.81  | 47.71  | 43.77  | 42.18  |
| 57631 | LRCH2          | -1.68 | 8.85E-05 | 80.32  | 83.41  | 89.35  | 49.77  | 51.10  | 50.12  |
| 57643 | ZSWIM5         | -1.87 | 2.72E-03 | 100.32 | 85.89  | 117.06 | 51.09  | 56.00  | 55.06  |
| 57648 | KIAA1522       | 1.65  | 2.01E-04 | 50.91  | 57.45  | 52.17  | 90.31  | 86.95  | 87.78  |
| 57717 | PCDHB16        | -1.95 | 5.45E-03 | 119.35 | 159.84 | 109.59 | 70.44  | 66.85  | 62.16  |
| 60598 | KCNK15         | 1.78  | 9.74E-04 | 93.51  | 85.21  | 93.80  | 167.84 | 174.02 | 143.83 |
| 64093 | SMOC1          | 3.17  | 2.09E-03 | 56.25  | 31.77  | 44.90  | 137.50 | 141.14 | 142.97 |
| 64151 | NCAPG          | 1.87  | 4.65E-04 | 65.54  | 63.02  | 76.66  | 129.26 | 127.34 | 127.50 |
| 64288 | ZNF323         | -1.63 | 2.40E-03 | 16.04  | 19.06  | 16.09  | 10.77  | 11.02  | 9.60   |
| 64798 | DEPDC6         | 2.07  | 5.52E-03 | 17.52  | 14.91  | 13.47  | 33.80  | 36.02  | 25.31  |
| 64866 | CDCP1          | 1.67  | 1.69E-03 | 196.13 | 238.85 | 242.89 | 378.24 | 373.89 | 377.47 |
| 79056 | PRRG4          | 1.79  | 2.70E-03 | 24.82  | 20.55  | 27.67  | 43.50  | 42.12  | 44.84  |
| 79603 | LASS4          | 1.57  | 2.28E-04 | 33.94  | 32.09  | 33.40  | 54.68  | 49.05  | 52.03  |
| 79682 | MLF1IP         | 1.55  | 1.87E-03 | 83.45  | 68.98  | 80.29  | 123.87 | 117.30 | 119.21 |
| 79772 | MCTP1          | -1.98 | 6.21E-04 | 46.38  | 54.91  | 46.12  | 23.14  | 24.67  | 26.60  |
| 79781 | IQCA1          | 2.46  | 5.01E-06 | 11.64  | 11.80  | 11.45  | 30.00  | 28.22  | 27.51  |
| 79905 | TMC7           | 1.98  | 2.04E-04 | 59.59  | 54.26  | 64.88  | 116.80 | 120.91 | 116.56 |
| 79966 | SCD5           | 1.60  | 3.51E-04 | 121.80 | 107.19 | 119.07 | 189.09 | 180.74 | 188.55 |
| 79974 | C7orf58        | -2.15 | 6.58E-04 | 405.27 | 338.39 | 437.01 | 178.31 | 191.45 | 179.79 |
| 80227 | PAAF1          | -1.55 | 4.26E-03 | 61.26  | 69.89  | 59.23  | 44.13  | 36.72  | 42.13  |
| 80323 | CCDC68         | -4.00 | 4.26E-04 | 116.34 | 104.55 | 138.89 | 24.36  | 32.10  | 33.41  |
| 80339 | PNPLA3         | -1.87 | 3.34E-03 | 87.09  | 63.10  | 79.53  | 38.90  | 41.21  | 42.42  |

|        |                |       |          |        |        |        |        |        |        |
|--------|----------------|-------|----------|--------|--------|--------|--------|--------|--------|
| 80704  | SLC19A3        | -1.78 | 1.02E-03 | 21.79  | 18.28  | 22.40  | 11.78  | 12.09  | 11.27  |
| 81493  | SYNC           | 1.58  | 4.95E-04 | 189.30 | 215.03 | 198.65 | 316.09 | 331.83 | 305.15 |
| 81832  | NETO1          | -3.37 | 1.71E-03 | 17.89  | 26.83  | 16.93  | 5.31   | 6.40   | 6.59   |
| 81849  | ST6GALNA<br>C5 | -2.10 | 9.86E-03 | 34.39  | 20.85  | 31.47  | 14.26  | 13.82  | 13.17  |
| 83540  | NUF2           | 2.43  | 2.71E-04 | 19.72  | 15.59  | 19.15  | 44.10  | 43.96  | 44.01  |
| 83992  | CTTNBP2        | -2.26 | 7.00E-04 | 50.95  | 53.64  | 56.74  | 26.66  | 20.24  | 24.41  |
| 84189  | SLITRK6        | -3.05 | 6.62E-04 | 25.59  | 20.99  | 19.42  | 8.44   | 6.69   | 6.52   |
| 84443  | FRMPD3         | 1.80  | 6.14E-03 | 13.34  | 10.90  | 15.74  | 25.94  | 22.91  | 23.22  |
| 84680  | ACCS           | -1.50 | 7.33E-03 | 36.47  | 44.24  | 36.71  | 28.55  | 24.06  | 25.43  |
| 84795  | PYROXD2        | -2.75 | 3.43E-03 | 72.15  | 88.96  | 58.76  | 32.27  | 22.09  | 25.51  |
| 84856  | LOC84856       | 1.60  | 5.60E-03 | 64.42  | 51.15  | 48.62  | 89.75  | 86.38  | 86.03  |
| 84913  | ATOH8          | 2.36  | 1.90E-04 | 41.33  | 35.59  | 42.66  | 93.17  | 99.67  | 88.88  |
| 84952  | CGNL1          | 2.63  | 4.02E-04 | 9.29   | 8.53   | 8.29   | 24.66  | 24.73  | 19.34  |
| 84969  | TOX2           | 1.72  | 2.54E-03 | 38.64  | 38.76  | 34.37  | 73.27  | 58.97  | 60.02  |
| 84978  | FRMD5          | 1.56  | 5.70E-04 | 71.54  | 65.47  | 72.95  | 113.85 | 102.99 | 110.34 |
| 85463  | ZC3H12C        | -1.52 | 5.12E-03 | 145.36 | 170.77 | 161.40 | 93.14  | 112.18 | 109.54 |
| 85477  | SCIN           | 2.29  | 2.96E-03 | 11.67  | 11.25  | 12.31  | 22.01  | 25.16  | 33.40  |
| 90417  | C15orf23       | 1.51  | 9.43E-03 | 135.72 | 110.12 | 149.28 | 199.46 | 198.52 | 199.05 |
| 91752  | ZNF804A        | -2.14 | 4.22E-03 | 62.72  | 89.79  | 75.99  | 30.45  | 38.25  | 38.27  |
| 92126  | DSEL           | -1.71 | 3.39E-04 | 919.30 | 985.23 | 889.77 | 571.98 | 556.10 | 507.28 |
| 92737  | DNER           | -2.76 | 3.24E-05 | 59.29  | 54.09  | 60.26  | 20.36  | 20.01  | 22.46  |
| 93145  | OLFM2          | 1.57  | 3.73E-05 | 324.25 | 322.89 | 326.91 | 528.64 | 510.81 | 489.45 |
| 114134 | SLC2A13        | -2.18 | 3.17E-03 | 207.37 | 165.23 | 239.11 | 85.95  | 104.03 | 90.18  |
| 114795 | TMEM132B       | -2.12 | 2.23E-04 | 34.58  | 33.41  | 33.89  | 16.46  | 14.22  | 17.30  |
| 114899 | C1QTNF3        | 2.94  | 1.97E-05 | 9.48   | 9.91   | 10.02  | 29.66  | 30.26  | 26.40  |
| 114907 | FBXO32         | 2.06  | 2.15E-03 | 195.21 | 224.65 | 161.81 | 417.82 | 415.14 | 367.19 |
| 116093 | DIRC1          | -2.18 | 3.33E-03 | 14.36  | 18.98  | 13.85  | 8.19   | 6.35   | 7.09   |
| 116159 | CYYR1          | -2.05 | 8.73E-05 | 18.19  | 18.82  | 19.04  | 8.74   | 8.66   | 9.89   |
| 116496 | FAM129A        | 1.50  | 3.46E-04 | 217.33 | 197.36 | 210.55 | 325.40 | 310.95 | 301.76 |
| 120892 | LRRK2          | -1.85 | 1.38E-03 | 50.74  | 43.42  | 55.25  | 26.60  | 28.56  | 25.71  |
| 121601 | ANO4           | -1.96 | 8.81E-04 | 135.28 | 115.75 | 106.72 | 61.68  | 63.25  | 57.49  |
| 122970 | ACOT4          | 1.60  | 8.79E-03 | 17.98  | 14.96  | 17.45  | 29.72  | 22.87  | 28.06  |
| 126820 | WDR63          | -1.88 | 3.91E-03 | 57.04  | 42.86  | 56.85  | 26.51  | 30.25  | 26.48  |
| 128102 | LOC128102      | 1.82  | 1.35E-03 | 9.16   | 11.23  | 9.29   | 18.28  | 16.73  | 18.98  |
| 128239 | IQGAP3         | 2.09  | 2.24E-03 | 32.46  | 23.89  | 33.03  | 64.91  | 62.02  | 60.09  |
| 129293 | C2orf89        | -2.19 | 3.03E-03 | 84.19  | 83.22  | 86.98  | 47.80  | 31.19  | 37.06  |
| 130574 | LYPD6          | -1.53 | 8.00E-03 | 17.48  | 20.41  | 21.74  | 11.83  | 12.59  | 14.42  |
| 130576 | LYPD6B         | -2.04 | 3.11E-05 | 26.69  | 24.10  | 24.17  | 12.18  | 12.40  | 12.17  |
| 133383 | C5orf35        | 2.04  | 1.53E-03 | 12.31  | 14.42  | 11.21  | 25.45  | 23.40  | 28.41  |
| 137872 | ADHFE1         | -1.70 | 6.43E-04 | 43.58  | 38.88  | 40.93  | 25.82  | 22.26  | 24.64  |
| 143570 | XRRA1          | -1.75 | 1.13E-03 | 78.66  | 65.21  | 76.08  | 44.37  | 42.00  | 39.53  |
| 144455 | E2F7           | 1.51  | 2.10E-03 | 50.36  | 53.06  | 58.34  | 87.48  | 77.21  | 78.82  |
| 145781 | GCOM1          | 1.61  | 8.28E-03 | 10.30  | 7.71   | 10.09  | 15.69  | 14.06  | 15.49  |
| 150468 | CKAP2L         | 2.00  | 5.87E-03 | 38.28  | 31.97  | 50.47  | 81.85  | 78.95  | 81.15  |
| 151651 | EFHB           | -1.74 | 9.69E-03 | 8.48   | 5.97   | 7.69   | 4.70   | 4.07   | 3.96   |
| 157570 | ESCO2          | 2.18  | 3.35E-03 | 55.47  | 36.84  | 50.68  | 106.66 | 98.46  | 106.02 |
| 158866 | ZDHHHC15       | 1.77  | 2.77E-03 | 12.05  | 9.01   | 10.50  | 19.44  | 18.44  | 17.84  |
| 161291 | TMEM30B        | 1.86  | 3.73E-04 | 63.91  | 62.50  | 73.07  | 122.94 | 129.48 | 117.88 |
| 200916 | RPL22L1        | -1.81 | 2.88E-04 | 36.62  | 33.15  | 33.21  | 20.10  | 19.18  | 17.67  |
| 201799 | TMEM154        | 1.56  | 8.20E-03 | 69.80  | 53.41  | 69.79  | 100.69 | 104.48 | 95.83  |
| 219970 | GLYATL2        | 1.63  | 2.60E-03 | 29.40  | 34.45  | 30.12  | 51.30  | 46.11  | 55.43  |
| 220108 | FAM124A        | 1.90  | 4.95E-04 | 60.81  | 73.69  | 67.95  | 132.88 | 121.22 | 130.07 |
| 220134 | SKA1           | 1.80  | 6.56E-03 | 25.15  | 18.96  | 27.05  | 44.20  | 39.44  | 44.11  |

|        |           |       |          |        |        |        |         |         |         |
|--------|-----------|-------|----------|--------|--------|--------|---------|---------|---------|
| 220963 | SLC16A9   | 1.64  | 6.76E-03 | 8.13   | 6.10   | 7.83   | 12.26   | 12.70   | 11.24   |
| 221687 | RNF182    | -1.63 | 7.72E-04 | 57.78  | 64.08  | 57.06  | 39.09   | 36.70   | 34.29   |
| 221955 | DAGLB     | 1.81  | 3.54E-03 | 84.01  | 117.67 | 98.35  | 185.39  | 176.47  | 182.67  |
| 246777 | SPESP1    | -1.87 | 1.28E-04 | 12.61  | 13.94  | 12.40  | 7.11    | 7.08    | 6.64    |
| 255231 | MCOLN2    | 3.41  | 3.75E-05 | 16.74  | 13.98  | 16.53  | 51.73   | 55.56   | 53.65   |
| 259266 | ASPM      | 2.31  | 9.73E-03 | 32.11  | 19.43  | 35.62  | 66.80   | 67.86   | 66.52   |
| 261729 | STEAP2    | -1.51 | 8.44E-05 | 361.20 | 345.28 | 370.13 | 240.72  | 241.82  | 230.58  |
| 283120 | H19       | 2.09  | 1.33E-03 | 56.97  | 41.99  | 52.21  | 110.45  | 103.15  | 103.06  |
| 284217 | LAMA1     | -1.98 | 4.07E-03 | 59.87  | 48.68  | 67.15  | 29.45   | 32.96   | 26.28   |
| 284802 | FRG1B     | 1.65  | 1.43E-04 | 155.18 | 152.80 | 153.31 | 238.58  | 269.21  | 253.17  |
| 286097 | EFHA2     | -1.52 | 1.25E-04 | 59.99  | 60.11  | 61.84  | 37.81   | 40.94   | 41.00   |
| 286827 | TRIM59    | 1.55  | 4.32E-03 | 50.27  | 46.24  | 53.84  | 84.14   | 80.06   | 68.79   |
| 317772 | HIST2H2AB | 1.63  | 7.19E-04 | 130.25 | 145.36 | 152.47 | 239.91  | 221.97  | 234.34  |
| 347735 | SERINC2   | 1.53  | 9.05E-04 | 713.49 | 823.45 | 726.97 | 1157.16 | 1119.01 | 1190.53 |
| 348093 | RBPMS2    | 1.71  | 9.93E-04 | 45.77  | 38.71  | 39.03  | 74.19   | 66.78   | 70.22   |
| 353139 | LCE2A     | 3.94  | 7.08E-04 | 189.54 | 249.05 | 181.43 | 925.80  | 653.42  | 863.59  |
| 359821 | MRPL42P5  | 1.98  | 4.50E-03 | 25.37  | 28.43  | 19.22  | 47.08   | 51.18   | 46.17   |
| 374393 | FAM111B   | 2.36  | 2.25E-04 | 33.03  | 37.01  | 39.89  | 93.15   | 84.43   | 81.50   |
| 374969 | CCDC23    | 1.59  | 4.02E-03 | 50.12  | 62.01  | 48.77  | 86.50   | 81.69   | 88.09   |
| 387496 | RASL11A   | 1.50  | 4.02E-03 | 50.13  | 45.45  | 54.79  | 80.33   | 69.46   | 76.01   |
| 389432 | SAMD5     | -1.55 | 2.46E-03 | 21.32  | 25.54  | 26.06  | 15.78   | 15.46   | 15.75   |
| 392255 | GDF6      | 3.72  | 1.29E-03 | 39.35  | 23.47  | 37.40  | 129.80  | 121.07  | 121.45  |
| 401233 | LOC401233 | -1.91 | 4.85E-03 | 44.72  | 62.78  | 58.02  | 28.93   | 31.28   | 26.51   |
| 401884 | MGC57346  | 1.86  | 1.71E-04 | 160.06 | 143.78 | 155.84 | 303.95  | 272.36  | 280.72  |
| 440993 | LOC440993 | -2.05 | 4.30E-04 | 42.11  | 40.32  | 41.99  | 19.80   | 22.80   | 18.19   |
| 619279 | ZNF704    | 1.73  | 2.92E-03 | 8.39   | 7.36   | 8.37   | 15.53   | 13.97   | 12.13   |
| 641371 | ACOT1     | -1.56 | 1.44E-03 | 164.20 | 176.01 | 146.16 | 104.82  | 101.20  | 106.44  |
| 654342 | LOC654342 | -1.98 | 4.07E-04 | 455.32 | 393.66 | 465.67 | 232.64  | 207.73  | 225.21  |
| 654433 | LOC654433 | -1.78 | 5.36E-04 | 147.31 | 138.55 | 124.81 | 81.37   | 73.77   | 75.04   |
| 692087 | SNORD49B  | -2.50 | 2.15E-03 | 12.41  | 11.65  | 12.06  | 4.05    | 6.14    | 4.23    |
| 100132 | NBPF10    | -1.53 | 9.05E-03 | 232.20 | 186.19 | 246.84 | 148.79  | 147.29  | 139.63  |
| 120    | ADD3      | -1.49 | 1.81E-03 | 326.94 | 273.79 | 300.80 | 204.09  | 205.34  | 194.36  |
| 571    | BACH1     | -1.24 | 1.23E-01 | 84.13  | 110.90 | 80.55  | 76.94   | 75.74   | 70.10   |
| 694    | BTG1      | -1.38 | 1.38E-03 | 845.74 | 923.48 | 821.04 | 603.33  | 636.46  | 641.99  |
| 1026   | CDKN1A    | -1.19 | 2.57E-03 | 526.83 | 552.66 | 524.95 | 435.39  | 441.65  | 466.02  |
| 1033   | CDKN3     | 2.13  | 2.51E-02 | 47.83  | 26.11  | 55.70  | 92.84   | 92.53   | 91.27   |
| 1654   | DDX3X     | -1.32 | 2.65E-03 | 486.23 | 493.11 | 492.82 | 344.43  | 397.73  | 373.72  |
| 1806   | DPYD      | -1.32 | 2.66E-02 | 299.52 | 252.44 | 295.41 | 223.71  | 228.14  | 188.25  |
| 2028   | ENPEP     | -1.66 | 4.75E-02 | 10.24  | 17.57  | 13.57  | 8.07    | 9.50    | 7.34    |
| 2057   | EPOR      | -1.06 | 2.48E-02 | 39.14  | 38.09  | 38.40  | 37.12   | 35.25   | 36.50   |
| 2104   | ESRRG     | -1.15 | 1.63E-01 | 3.76   | 4.79   | 3.85   | 3.51    | 3.75    | 3.50    |
| 2700   | GJA3      | -1.33 | 3.62E-02 | 46.96  | 58.59  | 43.40  | 37.33   | 37.21   | 37.25   |
| 2934   | GSN       | -1.30 | 2.13E-03 | 619.98 | 595.14 | 573.47 | 487.05  | 443.49  | 450.16  |
| 3575   | IL7R      | -1.45 | 4.71E-02 | 151.98 | 101.88 | 136.58 | 83.95   | 95.82   | 90.42   |
| 3756   | KCNH1     | -1.12 | 4.73E-02 | 5.89   | 6.04   | 6.73   | 5.50    | 5.55    | 5.55    |
| 4093   | SMAD9     | 1.64  | 2.31E-02 | 108.20 | 69.70  | 105.36 | 152.86  | 159.13  | 152.14  |
| 4211   | MEIS1     | -1.45 | 1.74E-03 | 311.21 | 345.45 | 293.10 | 214.18  | 214.76  | 223.88  |
| 4354   | MPP1      | -1.27 | 3.96E-02 | 446.90 | 364.36 | 377.91 | 335.79  | 286.88  | 316.39  |
| 4741   | NEFM      | 1.59  | 2.99E-02 | 16.24  | 11.02  | 17.80  | 23.96   | 23.40   | 24.46   |
| 5379   | PMS2L1    | -1.14 | 2.36E-04 | 178.92 | 184.50 | 180.58 | 158.45  | 157.06  | 160.19  |
| 5927   | KDM5A     | -1.15 | 3.93E-02 | 97.20  | 109.45 | 103.60 | 87.23   | 95.58   | 86.63   |
| 6495   | SIX1      | 1.50  | 2.68E-02 | 175.68 | 248.13 | 168.49 | 291.18  | 299.83  | 297.01  |

|        |           |       |          |        |        |        |        |        |        |
|--------|-----------|-------|----------|--------|--------|--------|--------|--------|--------|
| 7779   | SLC30A1   | -1.25 | 2.80E-03 | 244.99 | 239.77 | 244.26 | 181.86 | 202.03 | 199.86 |
| 8218   | CLTCL1    | -1.18 | 1.18E-01 | 59.07  | 77.68  | 65.57  | 57.19  | 58.75  | 54.94  |
| 9319   | TRIP13    | 1.50  | 2.42E-02 | 83.87  | 60.29  | 87.61  | 117.03 | 113.29 | 117.21 |
| 9653   | HS2ST1    | -1.13 | 4.21E-02 | 245.23 | 220.02 | 240.91 | 218.06 | 202.48 | 206.09 |
| 9878   | TOX4      | -1.07 | 1.63E-01 | 506.61 | 551.55 | 498.74 | 494.94 | 498.08 | 464.27 |
| 10152  | ABI2      | -1.06 | 3.36E-02 | 271.29 | 261.56 | 277.74 | 257.49 | 253.75 | 253.72 |
| 10395  | DLC1      | -1.31 | 1.30E-01 | 70.96  | 110.23 | 80.69  | 64.54  | 68.51  | 67.22  |
| 10693  | CCT6B     | -1.32 | 2.71E-02 | 16.25  | 14.28  | 18.17  | 13.04  | 12.53  | 11.44  |
| 10769  | PLK2      | -1.66 | 4.17E-02 | 417.87 | 641.30 | 379.58 | 285.56 | 300.35 | 280.92 |
| 10817  | FRS3      | -1.12 | 3.57E-02 | 45.30  | 50.07  | 45.01  | 42.28  | 40.92  | 42.14  |
| 11009  | IL24      | -1.63 | 3.78E-02 | 10.57  | 17.48  | 12.17  | 7.80   | 8.62   | 8.25   |
| 22902  | RUFY3     | -1.22 | 1.62E-02 | 75.02  | 88.95  | 83.14  | 67.30  | 67.90  | 66.85  |
| 23013  | SPEN      | -1.19 | 2.77E-02 | 124.34 | 140.41 | 132.76 | 107.84 | 119.69 | 105.55 |
| 23102  | TBC1D2B   | -1.40 | 1.15E-04 | 223.85 | 215.72 | 214.58 | 160.00 | 157.64 | 150.77 |
| 23210  | JMJD6     | -1.14 | 1.93E-01 | 73.05  | 92.61  | 74.37  | 71.66  | 71.42  | 68.26  |
| 25800  | SLC39A6   | -1.07 | 3.05E-03 | 461.33 | 471.55 | 456.66 | 431.83 | 435.46 | 436.19 |
| 26039  | SS18L1    | -1.06 | 1.30E-01 | 33.26  | 32.70  | 36.19  | 31.43  | 32.24  | 32.28  |
| 26061  | HACL1     | -1.16 | 2.25E-01 | 98.47  | 134.48 | 103.50 | 97.46  | 96.60  | 96.05  |
| 26239  | LCE2B     | 1.62  | 1.94E-02 | 119.75 | 152.10 | 159.92 | 255.10 | 192.81 | 250.34 |
| 28513  | CDH19     | -1.16 | 2.38E-02 | 3.84   | 4.31   | 4.07   | 3.35   | 3.56   | 3.64   |
| 50651  | SLC45A1   | -1.17 | 3.19E-02 | 37.96  | 36.65  | 34.19  | 28.85  | 31.99  | 32.40  |
| 51765  | MST4      | 1.78  | 2.64E-02 | 79.63  | 50.03  | 86.31  | 117.55 | 134.35 | 132.42 |
| 53358  | SHC3      | -1.29 | 1.26E-01 | 263.56 | 381.83 | 262.73 | 236.53 | 233.24 | 233.54 |
| 54916  | C14orf101 | -1.23 | 5.23E-02 | 176.89 | 137.74 | 164.86 | 130.72 | 130.29 | 127.67 |
| 55006  | TRMT61B   | -1.25 | 3.04E-02 | 81.70  | 102.06 | 87.71  | 72.81  | 69.80  | 73.83  |
| 55070  | DET1      | -1.14 | 1.70E-02 | 55.09  | 57.78  | 53.72  | 51.30  | 47.57  | 47.89  |
| 55103  | RALGPS2   | -1.27 | 2.51E-03 | 231.80 | 231.25 | 235.14 | 171.24 | 191.86 | 187.79 |
| 55157  | DARS2     | -1.29 | 1.33E-03 | 85.35  | 92.45  | 88.30  | 71.70  | 66.79  | 67.48  |
| 55250  | ELP2      | -1.18 | 1.96E-03 | 153.40 | 153.09 | 148.58 | 133.92 | 125.90 | 125.98 |
| 55754  | TMEM30A   | -1.10 | 5.18E-02 | 693.51 | 749.61 | 685.33 | 624.66 | 651.85 | 664.31 |
| 55784  | MCTP2     | -1.31 | 2.53E-02 | 151.60 | 148.61 | 176.94 | 108.47 | 126.54 | 128.93 |
| 55860  | ACTR10    | -1.21 | 1.93E-02 | 430.30 | 388.06 | 376.09 | 340.23 | 311.86 | 337.84 |
| 55863  | TMEM126B  | -1.13 | 2.79E-03 | 238.10 | 233.91 | 236.90 | 205.20 | 205.64 | 216.72 |
| 56967  | C14orf132 | -1.08 | 1.83E-02 | 98.87  | 97.49  | 96.32  | 92.66  | 87.10  | 91.23  |
| 57639  | CCDC146   | -1.27 | 4.77E-02 | 23.78  | 26.57  | 29.11  | 18.59  | 21.38  | 22.77  |
| 59353  | TMEM35    | -1.25 | 4.86E-02 | 53.72  | 67.63  | 58.85  | 50.49  | 44.67  | 49.58  |
| 60489  | APOBEC3G  | -1.33 | 3.82E-03 | 39.80  | 38.52  | 42.33  | 31.37  | 31.27  | 27.86  |
| 64582  | GPR135    | -1.07 | 1.27E-01 | 84.50  | 90.32  | 83.46  | 82.90  | 82.11  | 76.90  |
| 64784  | CRTC3     | -1.15 | 1.51E-01 | 271.83 | 342.96 | 275.17 | 254.50 | 262.74 | 255.93 |
| 79465  | ULBP3     | -1.09 | 4.61E-02 | 121.81 | 115.36 | 125.76 | 114.33 | 109.25 | 110.76 |
| 79602  | ADIPOR2   | -1.12 | 2.74E-02 | 157.97 | 165.53 | 174.42 | 149.27 | 144.51 | 152.13 |
| 79670  | ZCCHC6    | -1.19 | 2.22E-02 | 148.29 | 166.08 | 154.36 | 123.02 | 136.51 | 135.48 |
| 79870  | BAALC     | -1.07 | 1.81E-02 | 379.04 | 380.76 | 382.95 | 366.84 | 355.06 | 345.21 |
| 80224  | NUBPL     | -1.23 | 3.72E-03 | 51.45  | 55.49  | 56.93  | 44.47  | 45.57  | 43.22  |
| 80742  | PRR3      | -1.12 | 4.38E-02 | 80.25  | 87.68  | 78.12  | 74.14  | 74.65  | 70.41  |
| 80830  | APOL6     | -1.16 | 1.31E-01 | 45.52  | 49.03  | 42.92  | 42.12  | 42.25  | 34.25  |
| 81609  | SNX27     | -1.15 | 1.64E-02 | 189.12 | 179.17 | 193.26 | 167.50 | 167.04 | 154.46 |
| 84243  | ZDHHHC18  | -1.08 | 3.52E-02 | 142.96 | 150.47 | 149.41 | 136.57 | 133.64 | 141.58 |
| 84250  | ANKRD32   | -1.26 | 1.65E-02 | 13.30  | 13.92  | 14.88  | 10.34  | 12.18  | 10.99  |
| 85450  | ITPRIP    | -1.14 | 1.20E-01 | 227.05 | 209.06 | 230.62 | 171.79 | 206.25 | 206.42 |
| 89890  | KBTBD6    | -1.19 | 3.66E-02 | 92.02  | 76.81  | 87.10  | 70.35  | 70.41  | 73.98  |
| 92017  | SNX29     | -1.11 | 1.43E-01 | 166.08 | 193.99 | 163.47 | 154.94 | 159.90 | 157.14 |
| 113451 | ADC       | -1.25 | 1.62E-02 | 53.76  | 62.72  | 52.90  | 45.69  | 45.59  | 43.73  |

|               |                  |       |          |        |        |        |        |        |        |
|---------------|------------------|-------|----------|--------|--------|--------|--------|--------|--------|
| 114879        | OSBPL5           | -1.15 | 2.29E-02 | 78.97  | 86.87  | 84.13  | 74.20  | 74.55  | 68.58  |
| 114897        | C1QTNF1          | -1.35 | 3.68E-04 | 196.01 | 203.58 | 186.98 | 146.53 | 146.05 | 141.56 |
| 136306        | SVOPL            | -1.05 | 1.35E-01 | 5.03   | 5.15   | 5.47   | 4.84   | 5.01   | 5.01   |
| 158219        | TTC39B           | -1.28 | 5.49E-02 | 32.15  | 38.35  | 41.77  | 27.21  | 31.99  | 28.42  |
| 192670        | EIF2C4           | -1.13 | 4.75E-02 | 58.72  | 62.79  | 60.41  | 53.05  | 57.75  | 50.87  |
| 199704        | ZNF585A          | -1.16 | 1.68E-02 | 68.77  | 67.23  | 75.71  | 61.41  | 61.21  | 59.88  |
| 219654        | ZCCHC24          | -1.14 | 2.05E-02 | 270.17 | 246.61 | 276.63 | 232.19 | 233.51 | 228.19 |
| 221981        | THSD7A           | -1.37 | 4.93E-02 | 11.25  | 13.13  | 9.81   | 8.92   | 7.14   | 8.90   |
| 256051        | ZNF549           | -1.17 | 2.09E-02 | 45.64  | 40.20  | 42.14  | 37.64  | 36.71  | 35.26  |
| 259290        | TAS2R31          | -1.39 | 2.09E-01 | 5.22   | 9.26   | 5.44   | 4.08   | 5.08   | 5.17   |
| 284273        | ZADH2            | -1.37 | 3.36E-02 | 162.40 | 118.24 | 149.61 | 105.65 | 106.02 | 103.22 |
| 284459        | HKR1             | -1.08 | 2.69E-02 | 32.98  | 33.48  | 34.63  | 30.72  | 32.30  | 30.70  |
| 319139        | SNORD56B         | -1.16 | 2.19E-02 | 2.84   | 3.00   | 2.67   | 2.49   | 2.51   | 2.33   |
| 345757        | FAM174A          | -1.30 | 1.68E-03 | 64.86  | 64.20  | 67.54  | 52.07  | 47.45  | 52.08  |
| 389812        | LCN15            | -1.10 | 2.17E-01 | 19.84  | 18.60  | 18.85  | 18.59  | 15.28  | 18.32  |
| 439921        | MXRA7            | -1.13 | 2.08E-02 | 721.05 | 654.58 | 711.93 | 624.95 | 601.03 | 621.82 |
| 677792        | SNORA1           | -1.31 | 1.21E-01 | 12.13  | 17.88  | 14.15  | 11.95  | 12.07  | 9.63   |
| 729668        | LOC729668        | -1.05 | 4.68E-02 | 23.93  | 23.77  | 23.28  | 21.72  | 22.81  | 22.84  |
| 100133<br>106 | LOC1001331<br>06 | -1.51 | 2.27E-02 | 12.47  | 17.50  | 14.92  | 8.79   | 10.26  | 10.58  |
| 100287<br>879 | LOC1002878<br>79 | -1.13 | 1.93E-01 | 3.69   | 4.57   | 3.65   | 3.42   | 3.62   | 3.48   |

**Supplementary Table 1B.**

| <b>Entrez ID</b> | <b>Symbol</b> | <b>Fold Change</b> | <b>p value</b> | <b>CONT ROL-1</b> | <b>CONT ROL-2</b> | <b>CONT ROL-3</b> | <b>IPAH-1</b> | <b>IPAH-2</b> | <b>IPAH-3</b> |
|------------------|---------------|--------------------|----------------|-------------------|-------------------|-------------------|---------------|---------------|---------------|
| 2                | A2M           | -1.81              | 1.44E-03       | 879.90            | 707.98            | 886.20            | 442.80        | 462.58        | 462.03        |
| 21               | ABCA3         | 2.33               | 6.68E-04       | 40.32             | 33.08             | 44.61             | 94.14         | 89.95         | 90.29         |
| 104              | ADARB1        | -1.78              | 6.58E-03       | 84.15             | 61.00             | 73.75             | 36.97         | 40.85         | 45.24         |
| 114              | ADCY8         | 2.33               | 2.40E-04       | 33.19             | 39.72             | 37.66             | 90.41         | 87.99         | 78.77         |
| 125              | ADH1B         | -4.33              | 2.26E-03       | 102.73            | 169.10            | 89.25             | 31.73         | 26.44         | 25.18         |
| 133              | ADM           | -1.53              | 3.93E-04       | 843.26            | 781.94            | 876.29            | 522.88        | 548.97        | 558.97        |
| 141              | ADPRH         | 1.51               | 6.33E-03       | 13.18             | 11.66             | 12.12             | 16.72         | 21.18         | 18.07         |
| 154              | ADRB2         | 2.19               | 1.48E-04       | 34.34             | 35.59             | 40.81             | 77.83         | 82.46         | 82.34         |
| 157              | ADRBK2        | 2.08               | 2.44E-04       | 11.34             | 9.76              | 11.74             | 22.42         | 23.65         | 22.34         |
| 182              | JAG1          | -2.54              | 1.31E-04       | 111.85            | 136.37            | 117.62            | 48.05         | 45.89         | 49.83         |
| 196              | AHR           | -1.84              | 7.09E-05       | 1377.36           | 1230.13           | 1351.21           | 728.62        | 709.89        | 718.58        |
| 202              | AIM1          | 3.64               | 3.72E-05       | 25.61             | 31.37             | 26.78             | 105.25        | 98.05         | 101.46        |
| 216              | ALDH1A1       | -2.34              | 7.86E-05       | 84.74             | 79.46             | 73.88             | 33.47         | 36.03         | 32.21         |
| 218              | ALDH3A1       | 2.91               | 5.23E-04       | 49.25             | 36.55             | 49.94             | 135.87        | 124.23        | 134.31        |
| 220              | ALDH1A3       | 1.92               | 1.25E-04       | 54.58             | 63.04             | 58.47             | 109.58        | 115.75        | 112.84        |
| 224              | ALDH3A2       | 1.91               | 8.10E-04       | 146.36            | 115.19            | 132.75            | 259.51        | 246.37        | 246.83        |
| 286              | ANK1          | -1.72              | 3.88E-03       | 38.06             | 32.35             | 43.20             | 23.00         | 20.61         | 22.27         |
| 302              | ANXA2         | 1.55               | 1.26E-05       | 1251.78           | 1212.91           | 1220.39           | 1853.59       | 1935.09       | 1927.06       |
| 306              | ANXA3         | 4.14               | 7.40E-05       | 17.70             | 17.66             | 14.89             | 73.46         | 73.49         | 60.93         |
| 332              | BIRC5         | 3.30               | 9.11E-04       | 44.30             | 29.36             | 43.81             | 124.40        | 134.43        | 128.52        |
| 347              | APOD          | -1.81              | 1.83E-04       | 183.00            | 159.08            | 170.30            | 91.95         | 97.75         | 93.99         |
| 409              | ARRB2         | 1.52               | 4.62E-03       | 73.26             | 64.12             | 80.15             | 103.04        | 116.42        | 112.26        |
| 490              | ATP2B1        | -1.65              | 3.89E-04       | 562.04            | 636.91            | 627.81            | 364.65        | 356.64        | 384.91        |
| 534              | ATP6V1G2      | -1.80              | 6.28E-04       | 92.60             | 75.32             | 82.74             | 46.30         | 46.97         | 46.33         |
| 580              | BARD1         | 2.33               | 3.18E-03       | 38.33             | 33.96             | 53.43             | 95.52         | 100.14        | 96.77         |
| 593              | BCKDHA        | 2.01               | 1.40E-03       | 106.77            | 143.82            | 119.47            | 258.09        | 246.56        | 239.42        |
| 597              | BCL2A1        | 2.13               | 1.12E-03       | 17.18             | 21.69             | 21.19             | 38.40         | 45.70         | 44.01         |
| 624              | BDKRB2        | -1.87              | 5.29E-03       | 237.39            | 269.06            | 191.80            | 138.07        | 116.81        | 118.26        |
| 627              | BDNF          | -2.56              | 2.20E-04       | 90.29             | 114.72            | 101.85            | 38.41         | 41.85         | 39.56         |
| 641              | BLM           | 2.45               | 3.14E-03       | 25.88             | 18.43             | 28.63             | 65.61         | 54.99         | 57.99         |
| 652              | BMP4          | 3.32               | 1.20E-05       | 99.53             | 101.53            | 88.93             | 332.47        | 319.55        | 311.77        |
| 653              | BMP5          | 1.83               | 8.91E-04       | 4.08              | 4.02              | 4.12              | 6.48          | 7.91          | 7.95          |
| 669              | BPGM          | -1.72              | 1.13E-05       | 212.41            | 202.96            | 204.13            | 116.98        | 122.02        | 121.99        |
| 672              | BRCA1         | 1.95               | 1.91E-03       | 23.33             | 23.29             | 30.66             | 52.13         | 49.73         | 48.96         |
| 675              | BRCA2         | 2.33               | 2.15E-04       | 21.67             | 24.60             | 27.09             | 58.62         | 56.45         | 55.71         |
| 699              | BUB1          | 6.37               | 9.54E-04       | 42.74             | 25.96             | 54.04             | 269.17        | 263.65        | 248.91        |
| 701              | BUB1B         | 4.95               | 1.29E-05       | 28.03             | 24.33             | 29.91             | 134.01        | 137.93        | 135.33        |
| 715              | C1R           | -1.55              | 3.34E-05       | 858.71            | 905.01            | 866.48            | 553.71        | 579.82        | 558.58        |

|      |          |       |          |         |         |         |         |         |         |
|------|----------|-------|----------|---------|---------|---------|---------|---------|---------|
| 716  | CIS      | -1.54 | 2.82E-03 | 1067.01 | 1253.23 | 1006.90 | 712.78  | 721.10  | 722.72  |
| 775  | CACNA1C  | -1.95 | 1.44E-03 | 120.08  | 97.02   | 123.46  | 61.62   | 54.22   | 58.77   |
| 828  | CAPS     | 1.62  | 1.41E-03 | 82.96   | 70.75   | 71.87   | 114.31  | 122.65  | 129.01  |
| 860  | RUNX2    | 1.53  | 2.84E-03 | 61.17   | 73.83   | 62.47   | 104.51  | 103.20  | 95.36   |
| 886  | CCKAR    | -1.96 | 7.67E-03 | 49.36   | 34.33   | 51.07   | 21.28   | 23.80   | 23.78   |
| 890  | CCNA2    | 2.54  | 2.44E-04 | 110.27  | 90.33   | 113.06  | 278.00  | 262.71  | 254.70  |
| 891  | CCNB1    | 4.25  | 4.19E-04 | 46.69   | 33.29   | 51.06   | 199.57  | 177.08  | 180.01  |
| 899  | CCNF     | 1.98  | 4.83E-03 | 26.74   | 19.15   | 28.33   | 50.96   | 47.69   | 48.65   |
| 920  | CD4      | -2.00 | 2.27E-04 | 59.54   | 49.91   | 51.98   | 26.20   | 27.04   | 27.35   |
| 978  | CDA      | 2.33  | 6.93E-04 | 52.43   | 40.75   | 51.78   | 105.62  | 119.91  | 112.14  |
| 983  | CDK1     | 4.63  | 1.86E-04 | 25.25   | 18.50   | 26.35   | 112.45  | 111.02  | 101.34  |
| 991  | CDC20    | 7.06  | 3.05E-04 | 81.44   | 47.78   | 76.25   | 482.41  | 501.57  | 466.35  |
| 995  | CDC25C   | 4.13  | 1.75E-04 | 15.10   | 11.34   | 15.12   | 60.88   | 58.31   | 52.40   |
| 1008 | CDH10    | -4.59 | 5.22E-03 | 43.84   | 18.91   | 38.45   | 7.20    | 6.91    | 7.95    |
| 1012 | CDH13    | 2.30  | 1.86E-04 | 98.11   | 82.46   | 99.41   | 213.86  | 208.02  | 221.46  |
| 1021 | CDK6     | -1.92 | 2.77E-04 | 293.10  | 261.43  | 291.12  | 145.47  | 137.32  | 157.57  |
| 1031 | CDKN2C   | 2.16  | 7.05E-03 | 28.94   | 17.99   | 25.28   | 57.79   | 51.06   | 46.81   |
| 1033 | CDKN3    | 5.99  | 1.50E-03 | 47.83   | 26.11   | 55.70   | 271.99  | 271.53  | 232.61  |
| 1047 | CLGN     | 1.93  | 6.97E-05 | 141.24  | 129.16  | 142.62  | 276.70  | 264.43  | 256.21  |
| 1058 | CENPA    | 4.19  | 2.22E-05 | 50.78   | 43.89   | 50.88   | 187.56  | 209.38  | 212.93  |
| 1062 | CENPE    | 3.87  | 1.23E-04 | 29.50   | 23.72   | 31.70   | 115.22  | 109.04  | 103.95  |
| 1063 | CENPF    | 4.35  | 7.60E-04 | 53.93   | 36.47   | 60.86   | 228.12  | 199.66  | 229.59  |
| 1111 | CHEK1    | 1.62  | 2.12E-05 | 143.22  | 133.91  | 137.36  | 226.22  | 225.34  | 220.66  |
| 1129 | CHRM2    | -2.78 | 1.03E-04 | 437.24  | 407.11  | 411.79  | 142.33  | 170.22  | 139.93  |
| 1130 | LYST     | -1.69 | 2.06E-03 | 77.93   | 94.09   | 81.70   | 49.08   | 46.54   | 54.60   |
| 1163 | CKS1B    | 1.81  | 1.77E-03 | 74.38   | 63.03   | 69.25   | 110.77  | 138.09  | 124.91  |
| 1164 | CKS2     | 1.82  | 9.91E-04 | 502.24  | 417.89  | 496.17  | 878.05  | 902.72  | 799.74  |
| 1277 | COL1A1   | -1.69 | 1.67E-03 | 1225.61 | 999.83  | 1190.55 | 686.55  | 637.17  | 696.77  |
| 1282 | COL4A1   | -2.63 | 5.01E-05 | 90.65   | 107.34  | 97.89   | 38.49   | 36.18   | 37.74   |
| 1284 | COL4A2   | -1.77 | 1.53E-03 | 116.59  | 144.17  | 115.18  | 70.74   | 69.25   | 71.94   |
| 1295 | COL8A1   | -2.55 | 9.06E-03 | 216.00  | 122.47  | 214.84  | 70.85   | 76.69   | 69.83   |
| 1301 | COL11A1  | -1.83 | 9.81E-03 | 40.39   | 27.63   | 40.36   | 19.88   | 19.46   | 20.02   |
| 1363 | CPE      | -1.52 | 1.15E-04 | 273.16  | 254.46  | 259.38  | 172.22  | 166.63  | 177.62  |
| 1466 | CSRP2    | -1.73 | 6.37E-03 | 209.42  | 206.48  | 197.31  | 100.15  | 111.62  | 142.90  |
| 1468 | SLC25A10 | 1.70  | 6.41E-04 | 44.48   | 51.50   | 44.91   | 84.18   | 77.16   | 77.78   |
| 1469 | CST1     | -7.23 | 1.12E-04 | 183.07  | 125.14  | 173.28  | 21.52   | 20.52   | 24.57   |
| 1512 | CTSH     | 2.25  | 7.90E-04 | 23.16   | 23.51   | 30.52   | 57.68   | 58.10   | 58.06   |
| 1545 | CYP1B1   | -1.89 | 6.80E-03 | 706.01  | 467.76  | 604.58  | 320.02  | 303.03  | 317.58  |
| 1556 | CYP2B7P1 | -1.58 | 5.18E-03 | 6.71    | 5.32    | 6.63    | 4.18    | 3.86    | 3.77    |
| 1612 | DAPK1    | 1.53  | 2.49E-03 | 21.15   | 19.47   | 24.19   | 33.57   | 32.70   | 33.04   |
| 1634 | DCN      | -1.51 | 1.57E-04 | 2448.75 | 2267.27 | 2402.30 | 1570.42 | 1620.48 | 1518.41 |



|      |        |       |          |        |        |        |        |        |        |
|------|--------|-------|----------|--------|--------|--------|--------|--------|--------|
| 1734 | DIO2   | -1.65 | 6.95E-03 | 30.34  | 27.65  | 32.98  | 15.47  | 20.13  | 19.68  |
| 1763 | DNA2   | 1.90  | 1.94E-03 | 10.49  | 12.53  | 11.46  | 24.21  | 18.96  | 22.38  |
| 1767 | DNAH5  | -1.94 | 4.85E-03 | 18.89  | 27.59  | 22.94  | 11.76  | 11.33  | 12.79  |
| 1829 | DSG2   | -6.51 | 7.42E-06 | 19.77  | 22.37  | 19.10  | 2.95   | 3.07   | 3.38   |
| 1841 | DTYMK  | 1.94  | 6.07E-04 | 94.07  | 82.56  | 99.63  | 183.50 | 186.38 | 164.95 |
| 1869 | E2F1   | 1.56  | 4.73E-04 | 83.84  | 83.51  | 73.80  | 126.69 | 126.12 | 123.34 |
| 1894 | ECT2   | 2.06  | 1.84E-04 | 193.56 | 214.77 | 177.90 | 400.92 | 403.11 | 403.86 |
| 1903 | S1PR3  | -1.96 | 1.35E-04 | 655.80 | 566.30 | 585.29 | 314.08 | 299.39 | 308.56 |
| 1910 | EDNRB  | -2.32 | 6.53E-03 | 513.75 | 796.40 | 483.84 | 258.36 | 257.12 | 257.39 |
| 1946 | EFNA5  | -1.83 | 4.85E-03 | 201.99 | 259.41 | 199.49 | 110.40 | 135.78 | 115.12 |
| 1956 | EGFR   | -1.51 | 3.20E-03 | 323.41 | 382.47 | 344.55 | 225.73 | 217.11 | 251.15 |
| 2026 | ENO2   | 1.87  | 6.30E-05 | 127.32 | 120.55 | 130.06 | 225.31 | 247.82 | 233.49 |
| 2044 | EPHA5  | -2.38 | 1.37E-03 | 56.53  | 76.25  | 61.31  | 23.90  | 28.32  | 29.23  |
| 2047 | EPHB1  | 1.75  | 6.92E-05 | 30.46  | 31.27  | 31.79  | 51.73  | 57.43  | 54.28  |
| 2069 | EREG   | -6.29 | 4.23E-04 | 177.62 | 133.60 | 236.07 | 29.21  | 27.03  | 30.74  |
| 2078 | ERG    | 6.28  | 5.79E-03 | 37.06  | 12.53  | 36.89  | 173.54 | 193.51 | 175.84 |
| 2123 | EVI2A  | 4.06  | 1.03E-04 | 16.17  | 17.16  | 16.24  | 67.85  | 76.84  | 56.67  |
| 2124 | EVI2B  | 2.99  | 2.64E-04 | 38.45  | 51.05  | 39.74  | 127.00 | 132.49 | 126.41 |
| 2146 | EZH2   | 2.20  | 1.26E-04 | 60.29  | 59.64  | 69.91  | 143.17 | 139.04 | 135.06 |
| 2159 | F10    | -1.80 | 3.03E-04 | 115.12 | 119.24 | 104.77 | 59.04  | 65.88  | 63.31  |
| 2167 | FABP4  | -5.13 | 5.25E-03 | 35.44  | 14.11  | 29.28  | 4.75   | 5.16   | 5.45   |
| 2175 | FANCA  | 1.62  | 9.04E-04 | 29.31  | 30.63  | 28.37  | 43.15  | 49.24  | 50.70  |
| 2177 | FANCD2 | 2.66  | 3.61E-04 | 23.81  | 21.42  | 28.83  | 66.75  | 63.91  | 66.22  |
| 2187 | FANCB  | 1.53  | 3.52E-03 | 10.94  | 11.28  | 13.64  | 18.45  | 18.27  | 18.03  |
| 2189 | FANCG  | 1.87  | 3.49E-05 | 44.62  | 44.71  | 43.85  | 86.81  | 84.43  | 78.42  |
| 2192 | FBLN1  | -1.56 | 8.63E-03 | 973.11 | 730.48 | 929.90 | 569.03 | 577.26 | 537.37 |
| 2195 | FAT1   | -1.53 | 8.78E-03 | 471.29 | 442.15 | 509.00 | 290.95 | 279.78 | 361.43 |
| 2199 | FBLN2  | -2.57 | 4.62E-05 | 347.53 | 294.89 | 331.43 | 124.93 | 125.04 | 128.85 |
| 2254 | FGF9   | 1.55  | 9.50E-04 | 4.57   | 3.95   | 4.52   | 6.85   | 6.81   | 6.48   |
| 2304 | FOXE1  | -2.79 | 2.76E-03 | 95.74  | 60.16  | 88.12  | 26.16  | 31.44  | 29.92  |
| 2305 | FOXM1  | 4.45  | 1.13E-03 | 93.95  | 59.84  | 110.01 | 386.13 | 400.07 | 387.79 |
| 2321 | FLT1   | -2.33 | 1.25E-03 | 17.60  | 21.11  | 18.70  | 7.92   | 7.08   | 9.64   |
| 2444 | FRK    | -1.51 | 3.11E-03 | 18.70  | 16.40  | 20.13  | 12.34  | 11.67  | 12.59  |
| 2491 | CENPI  | 3.04  | 1.67E-03 | 57.33  | 41.79  | 68.30  | 163.69 | 160.61 | 184.27 |
| 2534 | FYN    | -1.57 | 4.75E-03 | 268.43 | 206.34 | 244.99 | 155.54 | 154.34 | 150.01 |
| 2562 | GABRB3 | 2.27  | 4.52E-04 | 35.81  | 28.61  | 34.82  | 80.09  | 72.95  | 72.24  |
| 2564 | GABRE  | -1.75 | 9.08E-03 | 35.00  | 42.54  | 29.48  | 18.52  | 20.62  | 21.91  |
| 2650 | GCNT1  | 1.64  | 1.10E-03 | 139.08 | 118.77 | 130.68 | 197.68 | 214.75 | 224.11 |
| 2846 | LPAR4  | 1.76  | 3.20E-03 | 21.48  | 17.83  | 22.54  | 40.30  | 35.02  | 33.67  |
| 2892 | GRIA3  | -1.52 | 1.57E-03 | 205.65 | 170.83 | 184.62 | 120.87 | 124.36 | 123.64 |
| 2898 | GRIK2  | -3.61 | 1.21E-04 | 140.39 | 172.19 | 134.58 | 39.44  | 39.63  | 44.72  |

|      |           |       |          |         |         |         |         |         |         |
|------|-----------|-------|----------|---------|---------|---------|---------|---------|---------|
| 2952 | GSTT1     | -7.77 | 2.98E-05 | 160.17  | 134.10  | 173.33  | 19.27   | 18.40   | 22.48   |
| 2983 | GUCY1B3   | 1.99  | 1.77E-04 | 92.03   | 100.65  | 84.29   | 183.19  | 185.43  | 182.84  |
| 3006 | HIST1H1C  | 1.74  | 2.14E-03 | 162.66  | 201.34  | 191.14  | 351.45  | 310.12  | 303.68  |
| 3007 | HIST1H1D  | 2.29  | 1.01E-03 | 36.20   | 26.88   | 35.36   | 74.37   | 73.00   | 77.64   |
| 3008 | HIST1H1E  | 1.74  | 2.37E-03 | 1000.61 | 1300.99 | 1048.12 | 1903.65 | 1985.53 | 1940.26 |
| 3009 | HIST1H1B  | 4.54  | 7.29E-04 | 53.24   | 37.73   | 66.34   | 239.63  | 232.76  | 242.35  |
| 3012 | HIST1H2AE | 2.42  | 2.06E-04 | 10.62   | 9.86    | 12.04   | 27.71   | 24.50   | 26.35   |
| 3014 | H2AFX     | 1.84  | 6.58E-04 | 124.45  | 104.53  | 125.37  | 216.40  | 227.12  | 209.32  |
| 3015 | H2AFZ     | 2.02  | 1.80E-04 | 528.53  | 620.44  | 576.62  | 1201.31 | 1106.89 | 1183.86 |
| 3018 | HIST1H2BB | 3.57  | 1.03E-04 | 18.57   | 16.12   | 20.80   | 70.66   | 62.10   | 65.16   |
| 3024 | HIST1H1A  | 3.02  | 5.76E-06 | 55.58   | 54.66   | 59.61   | 173.03  | 163.79  | 176.46  |
| 3096 | HIVEP1    | -1.91 | 4.14E-03 | 98.21   | 139.06  | 106.62  | 59.22   | 58.12   | 62.98   |
| 3113 | HLA-DPA1  | -2.13 | 1.01E-04 | 108.87  | 121.69  | 103.19  | 52.12   | 51.87   | 52.47   |
| 3148 | HMGB2     | 2.92  | 7.33E-04 | 75.36   | 55.29   | 79.38   | 211.86  | 208.41  | 193.79  |
| 3161 | HMMR      | 6.80  | 2.25E-04 | 11.97   | 9.11    | 15.38   | 86.76   | 80.41   | 80.53   |
| 3187 | HNRNPH1   | 1.50  | 2.16E-03 | 349.02  | 301.70  | 359.37  | 525.52  | 504.02  | 487.67  |
| 3218 | HOXB8     | 3.15  | 6.73E-04 | 45.19   | 30.90   | 41.35   | 118.55  | 133.26  | 118.19  |
| 3222 | HOXC5     | -1.85 | 4.06E-03 | 19.90   | 19.28   | 19.55   | 12.09   | 11.06   | 8.51    |
| 3224 | HOXC8     | -1.58 | 4.59E-03 | 33.59   | 32.98   | 31.01   | 23.74   | 19.50   | 18.36   |
| 3248 | HPGD      | 2.64  | 1.68E-03 | 3.59    | 3.57    | 3.57    | 11.94   | 8.20    | 8.12    |
| 3290 | HSD11B1   | -2.20 | 4.65E-04 | 55.27   | 62.01   | 48.68   | 23.80   | 25.80   | 25.75   |
| 3357 | HTR2B     | -1.90 | 2.67E-03 | 27.50   | 22.55   | 27.07   | 12.44   | 15.59   | 12.63   |
| 3384 | ICAM2     | 2.12  | 1.24E-05 | 24.61   | 22.81   | 24.13   | 52.20   | 49.73   | 49.43   |
| 3480 | IGF1R     | -1.93 | 1.02E-04 | 432.83  | 476.62  | 438.83  | 227.61  | 224.92  | 247.34  |
| 3490 | IGFBP7    | -1.80 | 1.91E-05 | 860.33  | 860.26  | 913.24  | 498.06  | 473.61  | 491.03  |
| 3554 | IL1R1     | -2.10 | 2.75E-06 | 651.19  | 634.32  | 658.40  | 317.83  | 301.50  | 305.33  |
| 3566 | IL4R      | -1.85 | 6.41E-04 | 217.78  | 268.08  | 247.86  | 127.88  | 134.29  | 135.22  |
| 3569 | IL6       | -1.99 | 9.83E-03 | 488.00  | 743.99  | 628.19  | 263.65  | 337.15  | 334.64  |
| 3598 | IL13RA2   | 2.20  | 1.91E-04 | 448.90  | 390.84  | 405.54  | 974.35  | 929.34  | 841.05  |
| 3624 | INHBA     | -1.66 | 5.00E-03 | 1095.24 | 1452.69 | 1189.11 | 715.31  | 795.25  | 740.05  |
| 3627 | CXCL10    | -2.07 | 3.17E-04 | 6.39    | 7.38    | 7.21    | 3.68    | 3.29    | 3.18    |
| 3638 | INSIG1    | -1.61 | 7.05E-03 | 138.28  | 187.52  | 149.63  | 99.43   | 98.85   | 97.88   |
| 3655 | ITGA6     | 1.90  | 6.92E-03 | 224.00  | 153.99  | 219.59  | 402.87  | 351.75  | 380.46  |
| 3671 | ISLR      | 2.12  | 4.52E-05 | 215.15  | 221.33  | 208.23  | 444.54  | 487.39  | 434.07  |
| 3673 | ITGA2     | -1.58 | 3.75E-03 | 578.99  | 729.32  | 641.39  | 410.26  | 386.23  | 435.53  |
| 3696 | ITGB8     | -1.86 | 9.56E-03 | 186.66  | 126.84  | 170.31  | 76.89   | 88.68   | 94.25   |
| 3738 | KCNA3     | 1.53  | 4.89E-03 | 19.42   | 21.69   | 23.46   | 29.72   | 33.79   | 35.39   |
| 3751 | KCND2     | -3.88 | 1.88E-04 | 48.60   | 51.66   | 39.96   | 10.68   | 13.47   | 12.02   |
| 3775 | KCNK1     | 1.66  | 2.49E-04 | 34.22   | 36.97   | 39.03   | 62.59   | 61.29   | 59.28   |
| 3778 | KCNMA1    | 1.83  | 8.60E-04 | 145.88  | 180.85  | 149.67  | 290.93  | 287.48  | 293.90  |

|      |       |       |          |         |         |         |         |         |         |
|------|-------|-------|----------|---------|---------|---------|---------|---------|---------|
| 3832 | KIF11 | 4.05  | 5.74E-04 | 50.41   | 33.77   | 50.68   | 188.95  | 165.77  | 191.64  |
| 3833 | KIFC1 | 2.18  | 5.10E-03 | 38.11   | 28.28   | 45.88   | 77.46   | 84.41   | 82.89   |
| 3835 | KIF22 | 2.05  | 1.02E-04 | 77.62   | 67.23   | 72.82   | 154.33  | 143.38  | 149.49  |
| 3838 | KPNA2 | 1.61  | 5.93E-04 | 1102.57 | 964.05  | 1055.16 | 1691.97 | 1744.01 | 1587.08 |
| 3880 | KRT19 | 3.12  | 5.43E-03 | 84.90   | 45.81   | 89.27   | 234.63  | 219.38  | 231.66  |
| 3887 | KRT81 | 1.52  | 6.42E-03 | 25.03   | 20.47   | 22.13   | 31.17   | 34.02   | 37.74   |
| 3897 | L1CAM | -1.53 | 4.18E-04 | 19.37   | 18.04   | 19.59   | 12.07   | 12.07   | 13.19   |
| 3908 | LAMA2 | -1.65 | 1.59E-03 | 160.41  | 144.37  | 164.34  | 90.61   | 89.24   | 105.08  |
| 3912 | LAMB1 | -1.71 | 3.40E-03 | 909.38  | 1150.78 | 883.83  | 576.92  | 553.17  | 587.56  |
| 3925 | STMN1 | 1.73  | 2.49E-04 | 40.34   | 43.18   | 39.78   | 66.14   | 74.75   | 72.11   |
| 3976 | LIF   | -2.04 | 8.82E-03 | 86.14   | 87.97   | 107.49  | 35.15   | 55.50   | 47.61   |
| 3978 | LIG1  | 1.66  | 2.65E-06 | 57.36   | 59.71   | 57.83   | 97.63   | 96.55   | 96.14   |
| 4001 | LMNB1 | 2.28  | 4.08E-05 | 24.50   | 22.86   | 24.07   | 58.01   | 54.14   | 51.06   |
| 4060 | LUM   | -2.40 | 1.22E-05 | 1046.68 | 935.74  | 1001.49 | 413.27  | 412.62  | 419.84  |
| 4064 | CD180 | 35.07 | 2.77E-06 | 3.74    | 5.14    | 4.59    | 157.27  | 155.98  | 159.24  |
| 4126 | MANBA | -1.71 | 9.12E-03 | 83.95   | 116.48  | 83.23   | 54.36   | 56.49   | 54.68   |
| 4129 | MAOB  | 1.51  | 1.78E-03 | 49.47   | 41.56   | 47.73   | 71.13   | 71.16   | 67.35   |
| 4133 | MAP2  | -2.12 | 7.94E-03 | 157.20  | 101.73  | 160.01  | 64.66   | 65.26   | 67.60   |
| 4171 | MCM2  | 1.81  | 9.03E-05 | 60.12   | 64.83   | 62.07   | 109.53  | 119.76  | 109.33  |
| 4172 | MCM3  | 1.77  | 7.53E-05 | 102.18  | 110.73  | 101.34  | 188.03  | 190.30  | 178.64  |
| 4173 | MCM4  | 1.92  | 1.03E-04 | 75.90   | 85.90   | 76.66   | 156.88  | 149.24  | 151.56  |
| 4174 | MCM5  | 2.05  | 3.04E-05 | 91.15   | 89.22   | 99.43   | 193.78  | 188.21  | 192.87  |
| 4176 | MCM7  | 2.12  | 1.53E-04 | 123.94  | 146.20  | 137.77  | 302.44  | 278.50  | 285.66  |
| 4239 | MFAP4 | -2.59 | 2.51E-03 | 478.62  | 693.82  | 449.87  | 200.52  | 220.34  | 205.64  |
| 4254 | KITLG | -1.54 | 6.00E-04 | 171.32  | 157.37  | 177.84  | 114.68  | 105.28  | 108.48  |
| 4281 | MID1  | -1.83 | 6.85E-04 | 600.13  | 491.80  | 582.10  | 298.30  | 309.59  | 308.56  |
| 4288 | MKI67 | 3.94  | 5.13E-03 | 57.29   | 30.56   | 70.02   | 208.85  | 185.87  | 227.15  |
| 4330 | MN1   | -1.58 | 2.38E-03 | 178.89  | 175.41  | 208.96  | 110.08  | 120.50  | 124.93  |
| 4363 | ABCC1 | -1.59 | 2.59E-03 | 658.68  | 571.68  | 701.64  | 399.51  | 385.51  | 430.76  |
| 4436 | MSH2  | 1.50  | 1.54E-03 | 46.12   | 54.65   | 51.00   | 76.92   | 72.95   | 77.47   |
| 4489 | MT1A  | 1.74  | 7.74E-04 | 164.29  | 148.07  | 154.77  | 257.82  | 299.43  | 255.03  |
| 4494 | MT1F  | 1.60  | 4.11E-03 | 455.45  | 430.84  | 369.61  | 641.58  | 737.78  | 630.57  |
| 4495 | MT1G  | 2.38  | 5.36E-04 | 75.94   | 57.30   | 64.51   | 165.31  | 154.20  | 150.79  |
| 4499 | MT1M  | 1.64  | 3.77E-04 | 247.84  | 224.18  | 244.77  | 385.08  | 373.86  | 415.49  |
| 4501 | MT1X  | 1.53  | 1.39E-03 | 756.84  | 631.55  | 704.82  | 1055.64 | 1049.78 | 1088.82 |
| 4600 | MX2   | 1.60  | 2.31E-03 | 11.23   | 12.64   | 10.75   | 19.17   | 16.71   | 19.36   |
| 4605 | MYBL2 | 2.50  | 2.29E-04 | 46.39   | 42.81   | 52.22   | 116.18  | 128.03  | 109.88  |
| 4642 | MYO1D | -1.53 | 4.00E-03 | 727.34  | 576.74  | 689.62  | 434.06  | 440.59  | 429.03  |
| 4651 | MYO10 | -1.69 | 2.19E-03 | 630.83  | 538.02  | 687.34  | 366.86  | 351.83  | 377.29  |
| 4684 | NCAM1 | 4.49  | 1.08E-04 | 8.72    | 6.76    | 8.93    | 35.58   | 34.33   | 39.68   |

|      |           |       |          |         |         |         |         |         |         |
|------|-----------|-------|----------|---------|---------|---------|---------|---------|---------|
| 4685 | NCAM2     | -2.95 | 3.76E-03 | 62.57   | 36.29   | 57.90   | 16.38   | 18.31   | 18.45   |
| 4741 | NEFM      | 4.81  | 4.90E-04 | 16.24   | 11.02   | 17.80   | 69.00   | 68.87   | 78.73   |
| 4747 | NEFL      | 1.92  | 3.62E-04 | 30.31   | 25.15   | 26.89   | 53.93   | 50.56   | 53.93   |
| 4751 | NEK2      | 4.81  | 3.05E-05 | 33.47   | 26.99   | 31.27   | 155.00  | 135.88  | 150.34  |
| 4756 | NEO1      | -1.74 | 1.04E-05 | 320.55  | 331.98  | 310.51  | 186.08  | 183.54  | 182.28  |
| 4811 | NID1      | -1.57 | 5.47E-05 | 332.51  | 350.52  | 339.60  | 215.60  | 210.82  | 225.37  |
| 4826 | NNAT      | 1.76  | 1.02E-03 | 36.33   | 32.69   | 39.34   | 64.70   | 67.44   | 59.04   |
| 4835 | NQO2      | -1.91 | 7.61E-06 | 220.95  | 222.70  | 213.80  | 110.74  | 117.17  | 116.40  |
| 4854 | NOTCH3    | -1.72 | 3.59E-03 | 157.03  | 124.90  | 161.42  | 82.53   | 83.12   | 91.59   |
| 4923 | NTSR1     | 2.08  | 1.12E-03 | 55.41   | 44.07   | 56.70   | 106.81  | 115.49  | 102.19  |
| 4940 | OAS3      | 2.19  | 1.52E-04 | 21.89   | 18.39   | 19.90   | 45.80   | 42.03   | 43.92   |
| 4973 | OLR1      | -3.53 | 7.34E-03 | 153.95  | 74.57   | 148.20  | 32.02   | 37.03   | 37.72   |
| 4982 | TNFRSF11B | -1.59 | 1.36E-04 | 1119.85 | 1152.94 | 1095.88 | 665.40  | 732.55  | 715.75  |
| 4998 | ORC1L     | 2.06  | 1.25E-03 | 20.33   | 16.71   | 21.44   | 41.56   | 42.31   | 36.45   |
| 5010 | CLDN11    | 1.92  | 1.44E-03 | 853.72  | 653.94  | 819.13  | 1513.18 | 1498.28 | 1446.21 |
| 5026 | P2RX5     | 1.85  | 1.78E-03 | 54.50   | 44.34   | 58.36   | 98.79   | 93.98   | 98.12   |
| 5067 | CNTN3     | -1.62 | 2.27E-03 | 36.28   | 42.44   | 38.34   | 24.28   | 26.09   | 21.76   |
| 5080 | PAX6      | 3.48  | 4.98E-06 | 12.14   | 10.68   | 11.55   | 39.92   | 40.04   | 39.53   |
| 5111 | PCNA      | 1.74  | 2.12E-03 | 176.48  | 207.89  | 159.32  | 312.34  | 308.10  | 324.88  |
| 5126 | PCSK2     | -1.80 | 4.86E-03 | 168.02  | 119.13  | 151.97  | 81.31   | 81.15   | 81.86   |
| 5159 | PDGFRB    | -2.80 | 8.59E-04 | 535.85  | 735.85  | 516.04  | 211.55  | 218.85  | 207.31  |
| 5165 | PDK3      | 1.65  | 1.97E-04 | 49.96   | 45.79   | 46.07   | 75.31   | 82.18   | 76.98   |
| 5270 | SERPINE2  | -1.52 | 2.12E-05 | 2605.30 | 2583.93 | 2471.43 | 1665.77 | 1706.72 | 1667.39 |
| 5272 | SERPINB9  | -2.72 | 6.83E-03 | 51.05   | 94.97   | 58.98   | 24.91   | 25.83   | 24.51   |
| 5324 | PLAG1     | -1.59 | 1.70E-03 | 119.40  | 98.56   | 105.35  | 64.52   | 67.81   | 70.55   |
| 5327 | PLAT      | -1.84 | 4.31E-04 | 648.86  | 754.93  | 775.32  | 394.38  | 403.31  | 387.86  |
| 5328 | PLAU      | 1.74  | 9.92E-04 | 199.27  | 248.45  | 224.14  | 385.31  | 397.99  | 385.42  |
| 5332 | PLCB4     | -1.84 | 5.54E-05 | 191.56  | 209.52  | 192.70  | 103.95  | 109.20  | 109.74  |
| 5334 | PLCL1     | -1.66 | 4.90E-03 | 13.05   | 12.97   | 12.98   | 6.56    | 7.89    | 9.00    |
| 5347 | PLK1      | 6.44  | 4.78E-04 | 77.47   | 47.32   | 81.89   | 475.35  | 453.51  | 402.66  |
| 5366 | PMAIP1    | 2.18  | 1.94E-03 | 157.05  | 215.23  | 218.83  | 419.71  | 445.60  | 425.15  |
| 5427 | POLE2     | 2.05  | 3.19E-05 | 32.66   | 31.24   | 34.88   | 66.30   | 69.33   | 67.07   |
| 5493 | PPL       | 2.42  | 2.66E-04 | 29.61   | 32.34   | 35.37   | 70.67   | 81.21   | 83.56   |
| 5507 | PPP1R3C   | -1.86 | 3.74E-03 | 789.65  | 565.64  | 722.90  | 371.86  | 381.73  | 364.11  |
| 5519 | PPP2R1B   | -1.75 | 1.45E-04 | 444.20  | 397.53  | 426.82  | 235.40  | 252.83  | 237.82  |
| 5557 | PRIM1     | 2.68  | 3.55E-04 | 34.33   | 42.58   | 33.09   | 101.05  | 102.71  | 90.62   |
| 5577 | PRKAR2B   | -2.06 | 6.07E-03 | 109.82  | 161.90  | 108.05  | 60.02   | 61.11   | 63.11   |
| 5602 | MAPK10    | -2.11 | 5.38E-05 | 173.51  | 190.61  | 173.27  | 89.27   | 84.29   | 81.66   |
| 5603 | MAPK13    | 1.86  | 1.16E-05 | 30.12   | 28.32   | 28.93   | 52.52   | 55.05   | 54.55   |
| 5698 | PSMB9     | 1.71  | 3.08E-05 | 77.02   | 70.70   | 73.64   | 125.67  | 127.50  | 124.65  |

|      |         |       |          |         |         |         |        |         |        |
|------|---------|-------|----------|---------|---------|---------|--------|---------|--------|
| 5754 | PTK7    | -1.87 | 3.38E-03 | 124.98  | 172.72  | 141.35  | 83.12  | 76.41   | 75.69  |
| 5764 | PTN     | -2.95 | 6.16E-04 | 118.55  | 86.88   | 121.00  | 37.55  | 37.90   | 35.17  |
| 5789 | PTPRD   | 1.80  | 6.09E-03 | 15.30   | 11.64   | 15.09   | 23.31  | 23.66   | 28.75  |
| 5793 | PTPRG   | -1.79 | 7.13E-04 | 250.14  | 214.18  | 244.01  | 130.13 | 124.46  | 141.89 |
| 5827 | PXMP2   | 1.60  | 3.63E-04 | 211.10  | 194.93  | 224.73  | 336.24 | 331.29  | 341.78 |
| 5874 | RAB27B  | -2.01 | 8.36E-03 | 40.45   | 61.01   | 40.94   | 25.29  | 22.01   | 23.40  |
| 5888 | RAD51   | 2.21  | 2.70E-04 | 33.53   | 41.90   | 35.99   | 82.56  | 81.13   | 82.45  |
| 5903 | RANBP2  | -1.53 | 5.81E-03 | 208.86  | 178.57  | 223.83  | 128.93 | 126.78  | 144.47 |
| 5915 | RARB    | 1.97  | 1.04E-03 | 10.54   | 9.64    | 11.45   | 22.04  | 18.27   | 21.93  |
| 5933 | RBL1    | 1.79  | 6.97E-05 | 42.78   | 46.23   | 47.77   | 80.12  | 82.05   | 83.00  |
| 5959 | RDH5    | 3.17  | 9.71E-04 | 79.58   | 52.61   | 77.71   | 220.09 | 217.44  | 226.84 |
| 5982 | RFC2    | 1.69  | 2.95E-05 | 121.50  | 128.83  | 124.73  | 203.88 | 216.90  | 211.33 |
| 5983 | RFC3    | 1.83  | 3.13E-04 | 85.56   | 101.10  | 88.16   | 170.67 | 168.47  | 164.83 |
| 5984 | RFC4    | 1.95  | 5.21E-04 | 179.39  | 223.20  | 211.46  | 395.88 | 405.63  | 398.58 |
| 5985 | RFC5    | 1.92  | 1.12E-03 | 39.45   | 49.72   | 40.16   | 86.31  | 82.26   | 79.18  |
| 6000 | RGS7    | -3.07 | 2.07E-04 | 16.90   | 13.80   | 16.40   | 5.62   | 4.58    | 5.16   |
| 6091 | ROBO1   | -1.64 | 7.86E-03 | 303.49  | 405.28  | 308.31  | 207.07 | 197.24  | 217.56 |
| 6092 | ROBO2   | -2.64 | 1.75E-04 | 37.15   | 33.60   | 35.61   | 12.73  | 15.25   | 12.33  |
| 6201 | RPS7    | 1.50  | 1.38E-03 | 52.39   | 53.68   | 61.26   | 81.08  | 84.25   | 86.16  |
| 6240 | RRM1    | 1.62  | 1.09E-04 | 265.85  | 245.09  | 249.20  | 424.86 | 404.77  | 398.23 |
| 6241 | RRM2    | 3.71  | 1.02E-03 | 80.22   | 51.09   | 82.30   | 271.85 | 256.67  | 263.63 |
| 6331 | SCN5A   | -1.96 | 3.12E-05 | 55.94   | 60.93   | 59.49   | 30.84  | 28.87   | 30.32  |
| 6335 | SCN9A   | -2.82 | 6.91E-04 | 184.85  | 141.40  | 189.04  | 64.55  | 54.36   | 63.98  |
| 6347 | CCL2    | -1.70 | 5.77E-03 | 1713.22 | 1544.60 | 1778.04 | 829.19 | 1132.94 | 998.00 |
| 6364 | CCL20   | -2.36 | 1.16E-03 | 10.75   | 10.20   | 13.67   | 4.65   | 4.65    | 5.40   |
| 6382 | SDC1    | 1.74  | 1.53E-03 | 121.85  | 137.76  | 135.79  | 252.25 | 232.21  | 204.80 |
| 6387 | CXCL12  | -2.24 | 9.22E-04 | 181.42  | 133.32  | 161.93  | 72.07  | 71.57   | 69.37  |
| 6414 | SEPP1   | -1.71 | 3.62E-03 | 1263.46 | 989.09  | 1233.63 | 718.92 | 690.83  | 631.85 |
| 6470 | SHMT1   | 1.66  | 1.35E-04 | 31.89   | 33.72   | 29.93   | 52.84  | 53.64   | 52.21  |
| 6482 | ST3GAL1 | -2.00 | 1.93E-03 | 367.05  | 272.49  | 355.71  | 165.61 | 167.23  | 164.62 |
| 6491 | STIL    | 2.39  | 2.75E-03 | 66.08   | 45.55   | 69.22   | 137.17 | 146.10  | 149.34 |
| 6515 | SLC2A3  | -1.76 | 3.56E-04 | 623.22  | 558.80  | 656.17  | 350.36 | 357.43  | 338.67 |
| 6615 | SNAI1   | -1.56 | 6.56E-04 | 59.82   | 60.65   | 52.49   | 36.94  | 37.00   | 36.97  |
| 6622 | SNCA    | -3.07 | 9.15E-03 | 304.63  | 593.85  | 305.39  | 124.41 | 124.29  | 143.23 |
| 6638 | SNRPN   | -2.20 | 3.17E-03 | 16.31   | 11.91   | 14.96   | 7.12   | 5.51    | 6.96   |
| 6649 | SOD3    | -1.63 | 3.30E-03 | 262.53  | 205.82  | 250.90  | 149.43 | 150.36  | 142.06 |
| 6695 | SPOCK1  | -1.66 | 1.26E-03 | 582.78  | 700.92  | 604.41  | 388.56 | 358.35  | 388.13 |
| 6751 | SSTR1   | -2.31 | 1.36E-03 | 162.38  | 224.68  | 188.84  | 75.97  | 83.91   | 89.11  |
| 6775 | STAT4   | -1.88 | 4.56E-03 | 17.93   | 13.00   | 14.02   | 8.77   | 7.60    | 7.56   |
| 6781 | STC1    | -1.85 | 4.63E-04 | 1093.51 | 1253.90 | 1249.47 | 626.40 | 697.03  | 620.43 |
| 6839 | SUV39H1 | 1.88  | 9.90E-05 | 41.28   | 38.98   | 38.34   | 73.63  | 79.12   | 70.45  |

|      |           |       |          |         |         |         |         |         |         |
|------|-----------|-------|----------|---------|---------|---------|---------|---------|---------|
| 6907 | TBL1X     | -1.53 | 1.84E-04 | 136.12  | 139.52  | 143.60  | 92.29   | 86.21   | 94.78   |
| 6941 | TCF19     | 2.51  | 1.48E-04 | 36.24   | 42.89   | 44.06   | 98.24   | 104.61  | 106.19  |
| 7058 | THBS2     | -2.20 | 2.96E-05 | 1126.56 | 1017.72 | 1108.04 | 501.04  | 472.71  | 502.91  |
| 7083 | TK1       | 3.55  | 8.35E-04 | 129.42  | 93.42   | 146.51  | 477.74  | 419.15  | 412.88  |
| 7100 | TLR5      | 1.55  | 4.06E-03 | 10.50   | 9.85    | 8.53    | 15.46   | 15.51   | 13.70   |
| 7107 | GPR137B   | -1.63 | 2.49E-03 | 355.26  | 408.50  | 326.91  | 233.74  | 224.44  | 210.39  |
| 7112 | TMPO      | 2.40  | 3.19E-04 | 88.58   | 114.55  | 101.99  | 238.14  | 242.96  | 252.64  |
| 7128 | TNFAIP3   | -1.82 | 4.45E-03 | 245.03  | 297.23  | 238.59  | 122.38  | 158.92  | 147.23  |
| 7130 | TNFAIP6   | -1.61 | 3.28E-03 | 507.88  | 590.67  | 469.50  | 344.88  | 320.81  | 306.64  |
| 7153 | TOP2A     | 3.46  | 3.67E-03 | 170.78  | 92.43   | 174.31  | 534.32  | 484.45  | 495.66  |
| 7223 | TRPC4     | -3.28 | 5.75E-04 | 60.41   | 86.01   | 69.63   | 19.50   | 23.82   | 22.55   |
| 7272 | TTK       | 5.25  | 3.01E-05 | 20.00   | 17.58   | 22.63   | 109.37  | 107.36  | 99.15   |
| 7298 | TYMS      | 2.86  | 4.96E-05 | 234.01  | 199.05  | 237.15  | 642.38  | 629.32  | 643.62  |
| 7403 | KDM6A     | -1.53 | 1.40E-03 | 151.23  | 178.62  | 154.48  | 107.92  | 103.64  | 104.78  |
| 7422 | VEGFA     | -1.73 | 3.27E-04 | 292.27  | 320.72  | 274.03  | 166.09  | 172.51  | 173.41  |
| 7443 | VRK1      | 1.81  | 3.19E-04 | 60.84   | 58.44   | 67.60   | 118.92  | 108.64  | 110.74  |
| 7447 | VSNL1     | 1.61  | 1.99E-03 | 9.34    | 7.96    | 8.12    | 14.83   | 12.81   | 13.34   |
| 7458 | EIF4H     | 1.66  | 2.08E-04 | 679.58  | 648.41  | 695.37  | 1184.11 | 1056.31 | 1108.34 |
| 7468 | WHSC1     | 1.82  | 5.24E-05 | 66.77   | 61.27   | 65.61   | 113.22  | 121.00  | 118.63  |
| 7516 | XRCC2     | 2.08  | 1.64E-04 | 28.54   | 34.29   | 31.69   | 65.27   | 64.97   | 66.65   |
| 7772 | ZNF229    | -1.62 | 6.79E-03 | 44.69   | 59.41   | 55.20   | 31.19   | 31.78   | 35.17   |
| 7813 | EVI5      | -1.80 | 4.01E-03 | 148.81  | 116.26  | 145.32  | 81.15   | 67.31   | 79.49   |
| 7857 | SCG2      | -3.18 | 8.51E-04 | 48.34   | 69.00   | 46.58   | 17.86   | 17.09   | 16.60   |
| 7980 | TFPI2     | -2.03 | 1.17E-03 | 682.46  | 894.80  | 715.96  | 382.27  | 381.57  | 363.61  |
| 7991 | TUSC3     | -2.13 | 5.78E-04 | 424.99  | 506.90  | 403.06  | 222.17  | 203.35  | 202.68  |
| 8089 | YEATS4    | 1.59  | 2.27E-03 | 89.80   | 109.62  | 90.82   | 148.20  | 154.70  | 157.30  |
| 8208 | CHAF1B    | 1.91  | 2.40E-05 | 66.91   | 61.23   | 65.25   | 120.79  | 125.84  | 122.46  |
| 8226 | HDHD1     | -1.61 | 1.31E-04 | 236.72  | 234.14  | 252.33  | 146.28  | 156.69  | 146.10  |
| 8233 | ZRSR2     | -1.50 | 3.03E-03 | 77.84   | 69.30   | 65.58   | 43.71   | 49.73   | 47.98   |
| 8242 | KDM5C     | -1.77 | 6.94E-04 | 225.78  | 263.69  | 235.60  | 126.39  | 142.31  | 141.28  |
| 8294 | HIST1H4I  | 2.03  | 3.16E-04 | 66.35   | 59.12   | 58.27   | 135.40  | 121.01  | 116.51  |
| 8317 | CDC7      | 2.14  | 4.96E-04 | 8.78    | 8.38    | 10.53   | 18.98   | 20.77   | 19.61   |
| 8318 | CDC45     | 2.27  | 6.59E-06 | 56.33   | 61.47   | 57.93   | 134.59  | 132.25  | 131.72  |
| 8329 | HIST1H2AI | 4.36  | 2.77E-03 | 34.58   | 23.67   | 52.27   | 155.95  | 172.36  | 153.48  |
| 8330 | HIST1H2AK | 2.92  | 1.29E-03 | 46.79   | 65.68   | 45.81   | 164.87  | 134.42  | 163.63  |
| 8332 | HIST1H2AL | 2.80  | 8.17E-05 | 47.14   | 41.99   | 48.23   | 135.89  | 131.60  | 116.84  |
| 8335 | HIST1H2AB | 2.82  | 2.18E-04 | 20.70   | 17.48   | 21.02   | 60.38   | 49.92   | 56.78   |
| 8336 | HIST1H2AM | 2.75  | 4.17E-04 | 7.87    | 7.21    | 9.87    | 22.35   | 23.34   | 22.84   |
| 8338 | HIST2H2AC | 1.52  | 6.21E-03 | 412.12  | 536.18  | 448.73  | 735.75  | 683.71  | 702.88  |
| 8339 | HIST1H2BG | 2.38  | 1.43E-05 | 49.39   | 52.05   | 51.35   | 128.37  | 119.76  | 115.81  |
| 8341 | HIST1H2BN | 2.29  | 4.79E-05 | 138.27  | 126.40  | 139.70  | 327.90  | 298.56  | 299.40  |

|      |           |       |          |         |         |         |         |         |         |
|------|-----------|-------|----------|---------|---------|---------|---------|---------|---------|
| 8342 | HIST1H2BM | 4.44  | 1.27E-03 | 271.57  | 177.91  | 338.39  | 1165.92 | 1158.07 | 1177.56 |
| 8343 | HIST1H2BF | 4.27  | 1.95E-03 | 105.99  | 55.69   | 99.22   | 384.88  | 378.54  | 351.02  |
| 8344 | HIST1H2BE | 2.37  | 7.45E-05 | 45.35   | 47.69   | 50.01   | 119.76  | 103.80  | 115.66  |
| 8345 | HIST1H2BH | 3.00  | 1.98E-05 | 186.34  | 163.43  | 185.42  | 553.36  | 517.67  | 534.17  |
| 8346 | HIST1H2BI | 2.24  | 5.64E-03 | 7.98    | 6.26    | 8.67    | 18.23   | 13.56   | 19.53   |
| 8347 | HIST1H2BC | 1.98  | 4.94E-04 | 56.01   | 66.33   | 54.30   | 118.96  | 120.06  | 111.35  |
| 8348 | HIST1H2BO | 2.17  | 5.19E-03 | 17.13   | 16.62   | 22.40   | 44.58   | 32.72   | 44.29   |
| 8350 | HIST1H3A  | 2.89  | 1.68E-04 | 55.95   | 55.47   | 68.98   | 169.35  | 184.88  | 166.73  |
| 8351 | HIST1H3D  | 2.79  | 2.16E-03 | 321.65  | 254.00  | 421.35  | 940.92  | 876.43  | 961.04  |
| 8352 | HIST1H3C  | 1.96  | 1.61E-03 | 34.55   | 32.80   | 41.23   | 71.18   | 77.84   | 64.15   |
| 8353 | HIST1H3E  | 1.60  | 4.72E-04 | 6.33    | 5.76    | 6.29    | 10.06   | 10.21   | 9.19    |
| 8354 | HIST1H3I  | 2.56  | 8.83E-06 | 443.54  | 435.00  | 477.52  | 1184.78 | 1169.10 | 1121.51 |
| 8355 | HIST1H3G  | 4.56  | 1.28E-03 | 231.08  | 146.66  | 280.20  | 977.33  | 1004.47 | 1015.20 |
| 8356 | HIST1H3J  | 3.17  | 6.39E-04 | 25.55   | 22.54   | 32.91   | 85.38   | 92.44   | 78.91   |
| 8357 | HIST1H3H  | 4.02  | 8.59E-05 | 167.02  | 134.93  | 178.97  | 661.40  | 647.94  | 625.23  |
| 8358 | HIST1H3B  | 3.33  | 2.30E-03 | 180.44  | 139.45  | 257.30  | 656.82  | 646.82  | 617.58  |
| 8359 | HIST1H4A  | 2.16  | 1.55E-03 | 24.38   | 18.66   | 21.94   | 50.77   | 41.12   | 48.20   |
| 8360 | HIST1H4D  | 2.33  | 2.25E-04 | 31.52   | 31.34   | 37.17   | 83.47   | 74.58   | 74.89   |
| 8361 | HIST1H4F  | 2.18  | 1.43E-03 | 88.45   | 92.67   | 118.10  | 237.50  | 211.52  | 204.52  |
| 8364 | HIST1H4C  | 2.88  | 1.40E-04 | 349.05  | 412.81  | 432.48  | 1205.17 | 1163.92 | 1068.49 |
| 8366 | HIST1H4B  | 2.07  | 1.74E-04 | 59.59   | 50.31   | 58.67   | 116.60  | 116.76  | 115.60  |
| 8368 | HIST1H4L  | 2.18  | 3.47E-03 | 170.69  | 139.93  | 216.92  | 396.34  | 371.93  | 379.21  |
| 8418 | CMAH      | 3.54  | 9.43E-05 | 20.42   | 17.67   | 22.15   | 72.60   | 75.58   | 64.93   |
| 8438 | RAD54L    | 1.80  | 1.51E-04 | 16.90   | 19.43   | 18.02   | 32.36   | 33.44   | 32.12   |
| 8507 | ENC1      | -2.17 | 3.98E-05 | 84.10   | 80.74   | 88.57   | 37.05   | 38.94   | 40.96   |
| 8516 | ITGA8     | -4.03 | 2.95E-03 | 23.13   | 12.36   | 22.89   | 4.67    | 4.66    | 5.14    |
| 8544 | PIR       | -2.80 | 1.03E-04 | 66.79   | 81.29   | 66.58   | 25.93   | 25.31   | 25.44   |
| 8555 | CDC14B    | -1.57 | 7.60E-03 | 154.96  | 201.81  | 160.35  | 107.30  | 105.59  | 117.14  |
| 8601 | RGS20     | 1.57  | 6.61E-04 | 27.58   | 25.69   | 28.78   | 44.03   | 40.07   | 44.42   |
| 8613 | PPAP2B    | -1.51 | 3.07E-04 | 1978.01 | 1770.34 | 1812.56 | 1247.71 | 1209.62 | 1235.27 |
| 8630 | HSD17B6   | -1.66 | 9.24E-03 | 13.10   | 9.39    | 12.65   | 7.14    | 7.06    | 6.91    |
| 8633 | UNC5C     | 1.59  | 6.50E-03 | 12.42   | 10.99   | 14.45   | 18.96   | 19.39   | 21.70   |
| 8654 | PDE5A     | -1.75 | 1.38E-03 | 1033.49 | 824.14  | 976.69  | 558.51  | 525.72  | 532.91  |
| 8742 | TNFSF12   | 1.56  | 4.32E-03 | 104.69  | 107.13  | 110.89  | 150.48  | 191.76  | 159.62  |
| 8743 | TNFSF10   | 4.21  | 4.66E-05 | 43.54   | 39.19   | 37.94   | 190.97  | 154.91  | 161.83  |
| 8771 | TNFRSF6B  | 3.01  | 1.02E-04 | 67.11   | 67.77   | 71.02   | 183.23  | 232.33  | 203.88  |
| 8777 | MPDZ      | -1.62 | 5.95E-04 | 167.97  | 151.91  | 179.58  | 101.73  | 103.23  | 103.00  |
| 8792 | TNFRSF11A | 1.55  | 7.76E-04 | 29.37   | 26.47   | 29.97   | 45.67   | 41.84   | 45.34   |
| 8836 | GGH       | 2.20  | 4.32E-03 | 50.40   | 75.83   | 50.93   | 132.03  | 121.84  | 135.78  |

|      |           |       |          |        |        |        |         |         |         |
|------|-----------|-------|----------|--------|--------|--------|---------|---------|---------|
| 8838 | WISP3     | 2.66  | 2.04E-04 | 12.00  | 12.82  | 10.61  | 30.14   | 29.40   | 34.65   |
| 8844 | KSR1      | -2.45 | 1.23E-04 | 121.31 | 108.34 | 126.86 | 44.82   | 50.64   | 49.91   |
| 8847 | DLEU2     | 2.82  | 7.87E-03 | 37.09  | 19.44  | 37.75  | 87.87   | 91.83   | 86.19   |
| 8900 | CCNA1     | 1.85  | 5.80E-03 | 19.54  | 16.18  | 18.48  | 37.60   | 35.59   | 27.28   |
| 8925 | HERC1     | -1.52 | 8.28E-03 | 101.59 | 98.12  | 113.35 | 65.34   | 61.90   | 79.19   |
| 8968 | HIST1H3F  | 2.95  | 2.00E-03 | 79.16  | 52.93  | 86.30  | 219.63  | 202.16  | 221.54  |
| 8969 | HIST1H2AG | 3.16  | 1.83E-04 | 340.10 | 277.08 | 371.17 | 1051.40 | 1048.97 | 1026.69 |
| 8970 | HIST1H2BJ | 2.01  | 2.08E-03 | 6.28   | 5.30   | 7.28   | 13.64   | 12.11   | 12.20   |
| 9037 | SEMA5A    | -3.42 | 1.21E-04 | 448.27 | 377.59 | 468.52 | 123.58  | 116.74  | 138.50  |
| 9055 | PRC1      | 4.75  | 8.98E-04 | 98.73  | 58.76  | 102.26 | 411.82  | 415.40  | 405.96  |
| 9066 | SYT7      | 1.82  | 2.90E-03 | 64.62  | 78.96  | 73.36  | 143.18  | 137.78  | 113.85  |
| 9088 | PKMYT1    | 2.32  | 2.18E-05 | 28.75  | 32.09  | 29.76  | 68.31   | 72.34   | 69.16   |
| 9120 | SLC16A6   | -3.04 | 4.10E-03 | 373.96 | 640.99 | 392.03 | 168.35  | 135.86  | 158.17  |
| 9124 | PDLIM1    | -1.74 | 6.89E-03 | 329.22 | 440.90 | 324.99 | 202.67  | 225.84  | 200.66  |
| 9127 | P2RX6     | 1.55  | 7.89E-03 | 22.01  | 17.18  | 19.22  | 33.33   | 27.81   | 29.42   |
| 9133 | CCNB2     | 5.42  | 4.72E-04 | 63.26  | 42.65  | 68.96  | 329.60  | 343.46  | 274.55  |
| 9134 | CCNE2     | 2.07  | 6.67E-04 | 48.59  | 59.23  | 61.13  | 112.99  | 122.44  | 113.66  |
| 9156 | EXO1      | 2.38  | 1.69E-04 | 27.06  | 30.25  | 33.43  | 72.91   | 69.27   | 73.56   |
| 9162 | DGKI      | -1.55 | 8.79E-04 | 41.46  | 37.74  | 37.85  | 26.63   | 25.41   | 23.33   |
| 9184 | BUB3      | 1.64  | 2.36E-04 | 278.61 | 298.38 | 278.72 | 476.98  | 488.26  | 438.84  |
| 9185 | REPS2     | 1.64  | 1.29E-03 | 25.01  | 21.06  | 24.70  | 40.67   | 37.77   | 37.37   |
| 9194 | SLC16A7   | -1.78 | 2.23E-04 | 244.26 | 270.88 | 269.38 | 152.20  | 138.41  | 150.97  |
| 9212 | AURKB     | 2.92  | 3.72E-05 | 63.72  | 61.93  | 59.22  | 181.05  | 194.35  | 164.05  |
| 9232 | PTTG1     | 4.34  | 4.21E-04 | 46.76  | 32.47  | 50.62  | 181.87  | 188.46  | 193.74  |
| 9244 | CRLF1     | -1.94 | 2.79E-04 | 347.87 | 385.44 | 356.65 | 171.31  | 200.58  | 189.56  |
| 9252 | RPS6KA5   | 1.80  | 5.04E-03 | 24.79  | 18.33  | 24.06  | 44.12   | 38.45   | 38.38   |
| 9289 | GPR56     | 2.26  | 3.92E-03 | 49.39  | 76.29  | 51.20  | 131.56  | 133.36  | 134.41  |
| 9303 | SNORD25   | 1.66  | 6.87E-03 | 3.65   | 3.49   | 3.47   | 5.93    | 4.88    | 6.78    |
| 9319 | TRIP13    | 3.12  | 6.20E-04 | 83.87  | 60.29  | 87.61  | 240.04  | 243.54  | 239.51  |
| 9368 | SLC9A3R1  | 2.26  | 1.56E-04 | 212.89 | 174.85 | 198.17 | 454.32  | 436.85  | 435.52  |
| 9404 | LPXN      | 1.80  | 4.61E-03 | 208.09 | 289.42 | 218.05 | 430.10  | 438.19  | 416.48  |
| 9424 | KCNK6     | -1.57 | 3.75E-03 | 144.38 | 119.01 | 150.84 | 88.59   | 89.22   | 85.92   |
| 9451 | EIF2AK3   | -1.64 | 2.73E-03 | 127.92 | 163.99 | 138.84 | 85.85   | 89.61   | 87.22   |
| 9455 | HOMER2    | 1.84  | 4.28E-04 | 16.26  | 16.74  | 18.42  | 34.16   | 29.86   | 30.39   |
| 9493 | KIF23     | 2.32  | 3.79E-05 | 106.26 | 102.36 | 117.28 | 253.05  | 245.96  | 256.32  |
| 9497 | SLC4A7    | -1.51 | 9.99E-04 | 250.63 | 228.85 | 267.47 | 168.67  | 159.86  | 165.25  |
| 9518 | GDF15     | -1.93 | 5.68E-04 | 246.09 | 285.31 | 282.49 | 128.39  | 142.64  | 149.94  |
| 9536 | PTGES     | -1.75 | 2.02E-03 | 161.05 | 160.48 | 128.01 | 85.57   | 83.84   | 87.98   |
| 9563 | H6PD      | -1.52 | 7.32E-04 | 311.21 | 283.01 | 323.65 | 205.11  | 192.44  | 204.68  |
| 9582 | APOBEC3B  | 5.23  | 2.16E-03 | 62.51  | 32.14  | 69.36  | 303.89  | 278.38  | 275.75  |
| 9585 | KIF20B    | 4.04  | 2.87E-04 | 18.16  | 14.23  | 20.89  | 77.28   | 69.93   | 68.30   |



|       |           |       |          |        |        |        |        |        |        |
|-------|-----------|-------|----------|--------|--------|--------|--------|--------|--------|
| 9603  | NFE2L3    | 1.54  | 2.46E-03 | 111.87 | 95.18  | 114.98 | 167.28 | 157.45 | 171.27 |
| 9700  | ESPL1     | 1.72  | 3.84E-03 | 31.37  | 24.67  | 32.94  | 51.89  | 52.34  | 49.08  |
| 9723  | SEMA3E    | -2.12 | 2.69E-04 | 35.17  | 32.08  | 38.25  | 16.74  | 15.47  | 17.48  |
| 9728  | SECISBP2L | -1.64 | 3.39E-04 | 370.18 | 342.94 | 386.50 | 216.29 | 234.93 | 218.89 |
| 9732  | DOCK4     | -1.77 | 3.65E-04 | 181.63 | 172.41 | 197.45 | 99.26  | 102.21 | 110.55 |
| 9735  | KNTC1     | 2.06  | 8.32E-04 | 29.69  | 25.26  | 33.05  | 62.17  | 58.12  | 61.12  |
| 9760  | TOX       | -2.61 | 3.25E-04 | 64.68  | 81.00  | 64.95  | 24.96  | 28.02  | 27.71  |
| 9766  | KIAA0247  | -1.67 | 1.38E-03 | 159.66 | 197.61 | 186.56 | 106.51 | 110.15 | 108.72 |
| 9768  | KIAA0101  | 3.37  | 8.07E-04 | 70.22  | 52.73  | 83.65  | 234.62 | 237.26 | 225.15 |
| 9787  | DLGAP5    | 7.56  | 1.32E-03 | 28.17  | 14.02  | 32.42  | 196.76 | 184.92 | 182.72 |
| 9824  | ARHGAP11A | 2.24  | 3.63E-03 | 73.85  | 50.74  | 77.26  | 156.55 | 147.18 | 148.40 |
| 9829  | DNAJC6    | -1.77 | 3.77E-03 | 37.94  | 50.65  | 42.52  | 26.50  | 24.58  | 22.99  |
| 9833  | MELK      | 2.55  | 1.34E-04 | 62.80  | 56.91  | 68.88  | 158.49 | 170.71 | 151.73 |
| 9837  | GINS1     | 2.18  | 4.80E-04 | 43.43  | 38.83  | 50.11  | 97.82  | 98.00  | 93.34  |
| 9890  | LPPR4     | -4.41 | 7.10E-03 | 193.72 | 83.52  | 190.48 | 33.83  | 35.73  | 36.60  |
| 9918  | NCAPD2    | 2.05  | 4.10E-06 | 162.80 | 163.42 | 159.16 | 332.78 | 321.08 | 342.91 |
| 9928  | KIF14     | 3.98  | 5.79E-04 | 14.89  | 12.53  | 19.98  | 67.42  | 61.04  | 60.03  |
| 9962  | SLC23A2   | -1.58 | 1.85E-04 | 108.15 | 106.63 | 118.66 | 69.10  | 71.17  | 70.12  |
| 10024 | TROAP     | 2.72  | 2.96E-04 | 25.58  | 24.73  | 25.31  | 59.62  | 79.42  | 66.47  |
| 10046 | MAMLD1    | -1.51 | 1.25E-03 | 191.99 | 184.84 | 192.43 | 114.87 | 136.25 | 125.83 |
| 10051 | SMC4      | 2.28  | 2.65E-03 | 129.01 | 87.06  | 116.70 | 274.36 | 238.18 | 245.71 |
| 10112 | KIF20A    | 8.84  | 2.08E-03 | 45.71  | 18.27  | 48.98  | 344.17 | 341.44 | 312.71 |
| 10149 | GPR64     | 2.64  | 5.49E-04 | 14.17  | 10.82  | 12.04  | 29.03  | 34.74  | 33.99  |
| 10212 | DDX39     | 1.79  | 1.06E-05 | 62.33  | 62.77  | 64.50  | 117.24 | 110.36 | 111.69 |
| 10231 | RCAN2     | -2.61 | 2.44E-04 | 203.85 | 164.92 | 209.30 | 73.01  | 76.15  | 72.53  |
| 10234 | LRRC17    | 1.72  | 5.33E-05 | 62.60  | 63.06  | 58.57  | 108.41 | 101.89 | 105.82 |
| 10272 | FSTL3     | -1.52 | 2.45E-03 | 189.46 | 157.40 | 181.98 | 118.74 | 119.06 | 110.92 |
| 10293 | TRAIP     | 1.73  | 9.68E-04 | 16.79  | 19.80  | 18.02  | 31.87  | 33.33  | 29.02  |
| 10301 | DLEU1     | 1.99  | 1.31E-03 | 52.94  | 42.48  | 45.68  | 97.19  | 100.34 | 83.54  |
| 10324 | KBTBD10   | 2.63  | 2.16E-03 | 15.84  | 25.29  | 21.63  | 55.01  | 57.50  | 52.51  |
| 10350 | ABCA9     | -2.04 | 2.87E-04 | 28.24  | 30.01  | 30.03  | 16.04  | 13.31  | 13.83  |
| 10391 | CORO2B    | 1.91  | 4.18E-05 | 201.16 | 190.11 | 200.46 | 374.15 | 396.95 | 360.57 |
| 10403 | NDC80     | 4.86  | 2.19E-04 | 28.07  | 19.75  | 28.71  | 132.04 | 119.11 | 121.04 |
| 10437 | IFI30     | 2.48  | 7.02E-04 | 130.54 | 170.62 | 127.55 | 347.93 | 374.61 | 342.79 |
| 10460 | TACC3     | 2.99  | 6.22E-05 | 25.71  | 23.47  | 28.63  | 80.98  | 74.16  | 77.85  |
| 10465 | PPIH      | 1.51  | 6.92E-03 | 46.66  | 53.45  | 51.58  | 66.67  | 84.25  | 78.61  |
| 10512 | SEMA3C    | 1.58  | 1.52E-03 | 378.31 | 315.55 | 365.26 | 584.09 | 552.15 | 541.50 |
| 10529 | NEBL      | 1.55  | 6.03E-05 | 15.33  | 14.91  | 14.54  | 23.72  | 22.27  | 23.53  |
| 10535 | RNASEH2A  | 2.15  | 7.19E-05 | 58.27  | 53.55  | 62.57  | 126.16 | 124.39 | 123.83 |
| 10584 | COLEC10   | -3.09 | 9.75E-03 | 27.36  | 54.96  | 28.09  | 11.06  | 12.61  | 12.09  |

|       |                |       |          |         |        |         |        |        |        |
|-------|----------------|-------|----------|---------|--------|---------|--------|--------|--------|
| 10610 | ST6GALNA<br>C2 | 2.98  | 2.74E-03 | 58.05   | 37.06  | 63.87   | 164.91 | 155.39 | 153.03 |
| 10615 | SPAG5          | 3.83  | 8.67E-04 | 39.32   | 24.55  | 38.13   | 127.77 | 133.05 | 129.57 |
| 10630 | PDPN           | 3.00  | 2.77E-04 | 132.67  | 97.17  | 119.57  | 354.45 | 341.63 | 351.63 |
| 10635 | RAD51AP1       | 3.26  | 3.67E-06 | 19.72   | 20.54  | 21.54   | 69.58  | 64.70  | 66.92  |
| 10687 | PNMA2          | -2.04 | 9.80E-03 | 28.94   | 20.68  | 31.06   | 11.06  | 14.66  | 13.85  |
| 10721 | POLQ           | 2.27  | 1.38E-04 | 10.86   | 9.42   | 9.35    | 22.92  | 21.06  | 23.16  |
| 10733 | PLK4           | 3.55  | 1.27E-05 | 29.70   | 28.04  | 32.59   | 102.51 | 108.73 | 109.45 |
| 10783 | NEK6           | -1.61 | 1.66E-05 | 350.72  | 336.30 | 348.48  | 216.26 | 218.86 | 208.63 |
| 10794 | ZNF460         | -1.71 | 7.77E-03 | 175.14  | 230.32 | 192.41  | 114.13 | 103.67 | 132.63 |
| 10856 | RUVBL2         | 1.69  | 1.51E-05 | 146.70  | 149.23 | 151.97  | 261.54 | 248.30 | 246.94 |
| 10866 | HCP5           | 1.61  | 8.17E-03 | 21.13   | 20.19  | 21.61   | 35.85  | 37.48  | 27.77  |
| 10867 | TSPAN9         | -1.50 | 9.92E-03 | 52.00   | 64.24  | 55.36   | 35.75  | 35.52  | 42.93  |
| 10875 | FGL2           | -1.71 | 8.53E-05 | 740.79  | 792.91 | 809.93  | 446.43 | 474.57 | 449.53 |
| 10891 | PPARGC1A       | -3.18 | 1.80E-04 | 93.91   | 106.23 | 88.14   | 34.16  | 29.44  | 27.19  |
| 11004 | KIF2C          | 3.76  | 3.81E-04 | 15.13   | 12.12  | 18.42   | 57.52  | 58.10  | 56.20  |
| 11065 | UBE2C          | 2.66  | 7.10E-04 | 35.19   | 26.67  | 37.11   | 84.07  | 88.33  | 91.22  |
| 11067 | C10orf10       | 1.96  | 2.46E-04 | 112.50  | 125.05 | 126.09  | 256.70 | 231.36 | 224.93 |
| 11075 | STMN2          | -2.73 | 4.09E-03 | 1572.29 | 929.85 | 1464.56 | 499.27 | 474.24 | 481.33 |
| 11095 | ADAMTS8        | -1.67 | 1.44E-04 | 98.07   | 107.49 | 95.56   | 59.73  | 60.77  | 59.72  |
| 11096 | ADAMTS5        | -2.55 | 1.02E-04 | 181.73  | 201.49 | 185.75  | 70.30  | 70.32  | 82.18  |
| 11113 | CIT            | 3.45  | 4.30E-03 | 71.90   | 36.45  | 68.44   | 205.85 | 195.17 | 208.33 |
| 11130 | ZWINT          | 2.34  | 1.09E-06 | 55.09   | 55.41  | 56.74   | 134.33 | 127.50 | 130.31 |
| 11144 | DMC1           | 1.69  | 2.72E-03 | 6.29    | 5.52   | 5.93    | 11.36  | 9.71   | 8.96   |
| 11185 | INMT           | -3.09 | 1.13E-04 | 150.73  | 179.41 | 175.79  | 54.18  | 49.87  | 59.49  |
| 11226 | GALNT6         | 1.54  | 7.57E-05 | 159.55  | 164.76 | 170.16  | 248.56 | 251.50 | 263.88 |
| 11270 | NRM            | 2.09  | 6.08E-05 | 107.50  | 107.61 | 115.13  | 228.70 | 243.86 | 216.10 |
| 11339 | OIP5           | 2.25  | 5.48E-04 | 23.40   | 19.94  | 25.29   | 55.52  | 48.33  | 50.67  |
| 11340 | EXOSC8         | 1.57  | 7.03E-04 | 93.18   | 93.86  | 94.68   | 142.73 | 160.90 | 137.68 |
| 22795 | NID2           | -2.47 | 1.52E-05 | 522.06  | 512.69 | 478.97  | 197.65 | 201.67 | 214.64 |
| 22801 | ITGA11         | -2.41 | 3.14E-03 | 305.60  | 205.84 | 312.25  | 115.95 | 113.72 | 111.67 |
| 22854 | NTNG1          | 1.95  | 1.70E-04 | 63.38   | 61.49  | 71.36   | 132.16 | 125.07 | 124.74 |
| 22866 | CNKSR2         | 1.92  | 3.18E-03 | 13.44   | 10.02  | 10.16   | 21.41  | 23.14  | 20.04  |
| 22874 | PLEKHA6        | -1.71 | 5.86E-03 | 133.69  | 102.98 | 138.31  | 77.98  | 70.32  | 70.65  |
| 22925 | PLA2R1         | -2.53 | 3.94E-04 | 178.37  | 135.19 | 167.28  | 63.48  | 62.75  | 64.06  |
| 22941 | SHANK2         | -2.00 | 2.52E-03 | 82.51   | 72.44  | 85.92   | 41.22  | 33.62  | 45.63  |
| 22974 | TPX2           | 3.53  | 9.14E-04 | 102.54  | 67.93  | 106.21  | 337.27 | 328.71 | 311.71 |
| 22995 | CEP152         | 1.52  | 9.82E-04 | 12.00   | 10.50  | 12.13   | 17.17  | 17.35  | 17.95  |
| 23017 | FAIM2          | 2.72  | 1.48E-04 | 92.05   | 115.61 | 104.37  | 271.03 | 297.41 | 279.71 |
| 23022 | PALLD          | -1.54 | 5.05E-03 | 263.36  | 221.71 | 284.84  | 161.28 | 172.31 | 166.39 |
| 23025 | UNC13A         | -1.66 | 2.01E-03 | 15.80   | 19.17  | 18.88   | 10.23  | 11.47  | 10.74  |
| 23086 | EXPH5          | -1.73 | 1.51E-03 | 90.64   | 110.27 | 94.99   | 58.91  | 52.81  | 59.56  |

|       |           |       |          |         |         |         |         |         |         |
|-------|-----------|-------|----------|---------|---------|---------|---------|---------|---------|
| 23089 | PEG10     | 2.40  | 9.89E-03 | 443.02  | 242.35  | 434.09  | 889.42  | 903.71  | 898.78  |
| 23102 | TBC1D2B   | -1.53 | 7.98E-06 | 223.85  | 215.72  | 214.58  | 142.44  | 140.91  | 143.75  |
| 23150 | FRMD4B    | 2.90  | 2.47E-03 | 21.03   | 13.72   | 22.83   | 58.72   | 55.22   | 53.16   |
| 23204 | ARL6IP1   | 1.85  | 1.21E-04 | 1094.79 | 1209.07 | 1065.47 | 2138.85 | 2077.20 | 2022.96 |
| 23213 | SULF1     | -2.65 | 3.88E-08 | 729.50  | 716.36  | 720.48  | 275.52  | 272.83  | 269.04  |
| 23235 | SIK2      | -1.60 | 2.12E-06 | 585.30  | 569.30  | 573.53  | 356.25  | 366.04  | 360.93  |
| 23239 | PHLPP1    | 1.78  | 1.66E-03 | 44.88   | 55.05   | 45.95   | 79.47   | 89.48   | 90.51   |
| 23255 | KIAA0802  | -1.73 | 1.34E-05 | 79.37   | 82.62   | 79.88   | 47.97   | 45.19   | 46.44   |
| 23310 | NCAPD3    | 1.51  | 2.39E-05 | 74.68   | 77.25   | 77.11   | 113.05  | 118.85  | 114.56  |
| 23397 | NCAPH     | 3.82  | 8.40E-08 | 33.69   | 34.38   | 32.84   | 130.21  | 127.66  | 128.06  |
| 23421 | ITGB3BP   | 1.51  | 5.25E-03 | 110.21  | 137.58  | 111.87  | 185.88  | 182.94  | 172.73  |
| 23428 | SLC7A8    | -1.67 | 7.23E-03 | 684.38  | 517.64  | 707.37  | 377.14  | 391.58  | 371.42  |
| 23460 | ABCA6     | -2.81 | 2.66E-03 | 71.77   | 111.22  | 70.56   | 28.31   | 30.32   | 31.55   |
| 23461 | ABCA5     | -1.67 | 1.79E-03 | 25.41   | 31.58   | 26.87   | 16.30   | 16.35   | 17.49   |
| 23554 | TSPAN12   | -2.34 | 8.23E-03 | 23.01   | 37.26   | 22.54   | 12.58   | 10.99   | 11.86   |
| 23555 | TSPAN15   | 5.35  | 9.50E-06 | 16.04   | 13.83   | 16.17   | 83.43   | 77.16   | 85.64   |
| 23556 | PIGN      | -1.57 | 1.37E-03 | 139.38  | 122.92  | 142.96  | 91.24   | 85.59   | 81.72   |
| 23594 | ORC6L     | 1.77  | 1.54E-05 | 20.57   | 20.01   | 21.46   | 36.58   | 36.01   | 37.37   |
| 23705 | CADM1     | 1.90  | 8.00E-04 | 72.81   | 59.67   | 70.04   | 135.51  | 129.97  | 119.87  |
| 23710 | GABARAPL1 | -1.67 | 2.94E-03 | 1299.86 | 1031.63 | 1286.66 | 738.76  | 738.46  | 694.65  |
| 23768 | FLRT2     | -1.82 | 2.28E-04 | 384.61  | 340.92  | 392.32  | 200.82  | 212.11  | 201.19  |
| 24137 | KIF4A     | 5.23  | 9.22E-04 | 30.40   | 20.44   | 39.44   | 158.65  | 161.29  | 151.80  |
| 25788 | RAD54B    | 2.24  | 4.07E-04 | 36.26   | 29.16   | 36.63   | 76.85   | 75.53   | 75.73   |
| 25797 | QPCT      | 1.53  | 2.90E-03 | 85.01   | 73.97   | 71.30   | 111.10  | 114.69  | 125.96  |
| 25854 | FAM149A   | 2.10  | 7.76E-03 | 20.08   | 12.53   | 19.53   | 38.00   | 36.21   | 35.30   |
| 25878 | MXRA5     | -7.21 | 4.11E-05 | 194.87  | 232.52  | 180.14  | 24.43   | 29.67   | 30.18   |
| 25886 | POC1A     | 1.94  | 2.56E-03 | 26.91   | 21.43   | 27.99   | 47.20   | 54.75   | 46.08   |
| 25891 | PAMR1     | -2.45 | 1.68E-03 | 591.41  | 822.76  | 570.86  | 277.44  | 262.96  | 270.38  |
| 25903 | OLFML2B   | 4.82  | 2.02E-05 | 57.20   | 71.46   | 60.01   | 300.51  | 305.59  | 303.70  |
| 25924 | MYRIP     | 1.99  | 3.34E-03 | 20.42   | 14.07   | 18.63   | 35.34   | 34.72   | 35.79   |
| 25984 | KRT23     | 1.53  | 1.24E-03 | 15.04   | 13.09   | 15.32   | 22.28   | 21.50   | 22.88   |
| 26025 | PCDHGA12  | -1.73 | 1.82E-03 | 106.54  | 117.74  | 103.14  | 65.01   | 68.77   | 55.67   |
| 26147 | PHF19     | 1.66  | 5.42E-03 | 66.90   | 51.09   | 68.46   | 102.62  | 103.41  | 103.22  |
| 26191 | PTPN22    | 2.67  | 1.65E-03 | 14.25   | 21.75   | 17.13   | 47.62   | 50.98   | 43.15   |
| 26271 | FBXO5     | 2.49  | 3.82E-06 | 101.69  | 94.99   | 93.95   | 244.74  | 241.19  | 238.50  |
| 26503 | SLC17A5   | -1.69 | 1.95E-03 | 578.62  | 722.42  | 591.50  | 366.72  | 374.21  | 381.87  |
| 26585 | GREM1     | -1.52 | 1.35E-05 | 2833.23 | 2869.71 | 2787.10 | 1850.62 | 1917.34 | 1832.39 |
| 26586 | CKAP2     | 2.56  | 1.70E-03 | 165.16  | 115.59  | 171.61  | 399.57  | 374.16  | 382.70  |
| 27085 | MTBP      | 1.51  | 5.66E-03 | 18.19   | 20.41   | 16.76   | 30.77   | 26.28   | 26.58   |
| 27133 | KCNH5     | 2.20  | 8.51E-06 | 6.42    | 5.84    | 6.10    | 13.53   | 13.41   | 13.44   |

|       |          |       |          |        |        |        |         |         |         |
|-------|----------|-------|----------|--------|--------|--------|---------|---------|---------|
| 27141 | CIDEB    | 1.56  | 3.05E-03 | 22.60  | 19.80  | 24.38  | 32.98   | 34.12   | 36.98   |
| 27166 | PRELID1  | 1.51  | 3.29E-03 | 939.51 | 885.13 | 765.43 | 1244.93 | 1357.92 | 1300.07 |
| 27198 | GPR81    | 1.70  | 3.18E-04 | 7.43   | 6.90   | 8.06   | 12.54   | 12.57   | 13.01   |
| 27295 | PDLIM3   | 2.82  | 7.12E-04 | 21.19  | 15.21  | 21.19  | 55.37   | 53.57   | 53.17   |
| 27316 | RBMX     | 1.52  | 4.05E-03 | 132.93 | 117.21 | 120.89 | 168.07  | 188.83  | 205.86  |
| 27347 | STK39    | 1.56  | 2.44E-03 | 383.09 | 312.42 | 373.28 | 557.49  | 573.60  | 540.56  |
| 28951 | TRIB2    | -1.58 | 4.37E-04 | 53.51  | 55.14  | 60.23  | 34.72   | 37.40   | 35.03   |
| 29015 | SLC43A3  | 1.77  | 1.24E-04 | 553.02 | 610.28 | 542.97 | 992.12  | 1038.27 | 996.73  |
| 29028 | ATAD2    | 1.95  | 4.50E-03 | 63.70  | 48.79  | 72.31  | 122.91  | 114.71  | 123.34  |
| 29089 | UBE2T    | 2.56  | 1.35E-04 | 61.95  | 65.53  | 75.21  | 163.71  | 182.41  | 173.13  |
| 29091 | STXBP6   | 1.67  | 3.58E-03 | 32.85  | 42.71  | 36.49  | 63.31   | 58.15   | 65.69   |
| 29094 | HSPC159  | 1.51  | 6.56E-03 | 109.94 | 89.98  | 96.44  | 135.40  | 163.15  | 149.32  |
| 29127 | RACGAP1  | 2.66  | 2.13E-04 | 158.69 | 128.51 | 163.92 | 403.74  | 400.76  | 393.85  |
| 29128 | UHRF1    | 2.16  | 2.48E-04 | 70.42  | 78.35  | 85.72  | 171.34  | 159.99  | 174.20  |
| 29798 | C2orf27A | -1.55 | 1.57E-03 | 71.00  | 76.62  | 76.82  | 50.25   | 43.57   | 51.26   |
| 29893 | PSMC3IP  | 1.91  | 3.23E-03 | 20.64  | 16.96  | 23.46  | 38.14   | 41.97   | 36.35   |
| 29941 | PKN3     | 1.67  | 8.21E-06 | 28.82  | 30.45  | 29.91  | 50.21   | 49.07   | 49.53   |
| 29953 | TRHDE    | -2.09 | 3.39E-04 | 122.28 | 101.23 | 123.13 | 55.35   | 55.09   | 55.72   |
| 30061 | SLC40A1  | -2.81 | 1.97E-04 | 559.93 | 444.43 | 555.53 | 183.58  | 192.36  | 179.21  |
| 50515 | CHST11   | 1.64  | 3.66E-03 | 176.82 | 138.55 | 166.50 | 245.46  | 277.12  | 267.25  |
| 51016 | FAM158A  | 1.60  | 1.86E-04 | 34.42  | 31.87  | 35.34  | 53.38   | 55.87   | 52.96   |
| 51053 | GMNN     | 1.85  | 4.68E-04 | 43.72  | 52.19  | 47.96  | 85.40   | 94.05   | 87.15   |
| 51106 | TFB1M    | 1.49  | 4.33E-03 | 54.83  | 67.44  | 55.21  | 88.49   | 90.77   | 85.93   |
| 51129 | ANGPTL4  | -2.42 | 4.37E-05 | 201.97 | 225.45 | 195.36 | 87.80   | 83.20   | 86.16   |
| 51155 | HN1      | 1.67  | 1.86E-03 | 278.90 | 227.71 | 263.77 | 419.78  | 457.28  | 406.04  |
| 51171 | HSD17B14 | -1.64 | 8.52E-03 | 32.98  | 44.85  | 34.68  | 21.59   | 22.49   | 24.34   |
| 51200 | CPA4     | 2.40  | 7.65E-03 | 165.89 | 97.27  | 169.34 | 348.49  | 335.12  | 354.15  |
| 51203 | NUSAP1   | 4.47  | 1.56E-03 | 83.21  | 49.68  | 93.23  | 355.26  | 349.49  | 305.39  |
| 51363 | CHST15   | -2.08 | 2.98E-03 | 310.89 | 230.70 | 299.56 | 121.22  | 150.48  | 132.62  |
| 51384 | WNT16    | -1.59 | 3.59E-03 | 137.75 | 134.17 | 169.91 | 92.53   | 92.09   | 93.15   |
| 51512 | GTSE1    | 2.42  | 6.68E-05 | 35.67  | 37.20  | 41.47  | 89.71   | 89.88   | 96.77   |
| 51514 | DTL      | 2.37  | 2.35E-04 | 92.88  | 115.84 | 98.41  | 249.02  | 244.67  | 232.75  |
| 51533 | PHF7     | 1.64  | 1.04E-03 | 27.51  | 30.38  | 24.84  | 46.03   | 45.22   | 44.73   |
| 51555 | PEX5L    | 2.74  | 2.76E-03 | 55.36  | 36.19  | 59.14  | 138.77  | 130.42  | 143.13  |
| 51659 | GINS2    | 2.20  | 9.78E-05 | 155.43 | 144.79 | 166.47 | 347.05  | 355.85  | 321.80  |
| 51704 | GPRC5B   | -2.41 | 1.47E-03 | 170.98 | 236.06 | 172.79 | 74.62   | 82.59   | 83.39   |
| 51765 | MST4     | 2.14  | 9.92E-03 | 79.63  | 50.03  | 86.31  | 159.07  | 152.96  | 150.29  |
| 51816 | CECR1    | 2.25  | 3.17E-03 | 13.52  | 16.77  | 11.35  | 30.08   | 28.49   | 35.18   |
| 54069 | C21orf45 | 1.60  | 1.79E-04 | 39.08  | 40.28  | 40.02  | 63.57   | 67.65   | 60.17   |
| 54329 | GPR85    | 1.84  | 6.87E-04 | 12.57  | 11.91  | 14.59  | 23.67   | 24.92   | 23.18   |

|       |                |       |          |        |        |        |        |        |        |
|-------|----------------|-------|----------|--------|--------|--------|--------|--------|--------|
| 54443 | ANLN           | 5.83  | 6.49E-04 | 148.25 | 94.52  | 176.18 | 830.09 | 823.18 | 788.08 |
| 54478 | FAM64A         | 3.21  | 5.00E-04 | 31.05  | 24.88  | 35.75  | 97.85  | 105.53 | 90.81  |
| 54674 | LRRN3          | -2.09 | 7.35E-05 | 544.23 | 606.03 | 548.79 | 269.54 | 284.00 | 258.63 |
| 54700 | RRN3           | -1.53 | 2.79E-04 | 147.53 | 135.21 | 141.59 | 94.05  | 88.30  | 95.80  |
| 54733 | SLC35F2        | 2.73  | 3.68E-04 | 22.20  | 29.47  | 28.18  | 75.27  | 69.69  | 73.19  |
| 54757 | FAM20A         | -3.53 | 5.12E-04 | 86.61  | 129.68 | 99.96  | 28.13  | 30.68  | 30.80  |
| 54821 | ERCC6L         | 2.55  | 1.65E-04 | 5.19   | 4.35   | 5.40   | 12.82  | 12.28  | 12.91  |
| 54852 | PAQR5          | -2.61 | 5.00E-04 | 239.60 | 196.20 | 268.33 | 87.95  | 91.54  | 90.30  |
| 54879 | ST7L           | -1.90 | 5.93E-04 | 76.19  | 85.68  | 75.66  | 42.67  | 44.65  | 37.62  |
| 54892 | NCAPG2         | 2.87  | 2.14E-04 | 44.97  | 44.57  | 56.51  | 135.52 | 135.98 | 147.95 |
| 54941 | RNF125         | 1.66  | 4.90E-04 | 10.08  | 9.90   | 9.28   | 17.62  | 15.42  | 15.66  |
| 55008 | HERC6          | 1.56  | 1.58E-03 | 43.22  | 50.07  | 43.48  | 75.50  | 67.18  | 71.26  |
| 55061 | SUSD4          | 1.61  | 1.43E-03 | 14.46  | 12.67  | 15.27  | 21.68  | 22.97  | 23.68  |
| 55088 | C10orf118      | -1.71 | 1.27E-03 | 120.80 | 146.94 | 122.65 | 73.82  | 75.23  | 78.99  |
| 55089 | SLC38A4        | -2.13 | 6.10E-06 | 34.47  | 32.36  | 33.13  | 16.07  | 15.64  | 15.23  |
| 55143 | CDCA8          | 4.04  | 6.92E-05 | 36.82  | 27.77  | 32.65  | 131.36 | 132.57 | 128.61 |
| 55165 | CEP55          | 5.37  | 1.10E-03 | 53.26  | 32.56  | 64.69  | 273.78 | 270.14 | 264.01 |
| 55166 | CENPQ          | 2.21  | 2.15E-03 | 27.15  | 37.40  | 30.43  | 77.54  | 70.30  | 62.17  |
| 55214 | LEPREL1        | -1.79 | 1.90E-03 | 211.76 | 173.29 | 225.46 | 112.81 | 114.33 | 113.30 |
| 55215 | FANCI          | 2.49  | 2.69E-05 | 65.67  | 59.36  | 66.79  | 158.40 | 153.89 | 165.16 |
| 55224 | ETNK2          | -2.59 | 3.48E-04 | 102.17 | 134.58 | 109.48 | 45.25  | 44.79  | 43.46  |
| 55228 | PNMAL1         | 1.98  | 5.12E-04 | 17.72  | 20.54  | 18.23  | 41.01  | 35.24  | 35.62  |
| 55243 | KIRREL         | -1.52 | 2.16E-04 | 396.15 | 441.23 | 416.94 | 271.39 | 280.38 | 272.17 |
| 55244 | SLC47A1        | 2.20  | 1.52E-03 | 23.21  | 18.44  | 25.30  | 51.95  | 50.31  | 45.21  |
| 55247 | NEIL3          | 3.39  | 5.47E-04 | 29.72  | 25.60  | 38.30  | 103.03 | 101.09 | 112.84 |
| 55248 | TMEM206        | 1.66  | 3.77E-04 | 31.70  | 32.90  | 30.89  | 48.53  | 53.97  | 55.68  |
| 55320 | C14orf106      | 1.67  | 3.56E-03 | 57.34  | 47.98  | 60.10  | 98.97  | 84.01  | 92.62  |
| 55351 | STK32B         | -2.68 | 1.06E-04 | 49.10  | 43.51  | 53.63  | 17.44  | 18.57  | 18.59  |
| 55355 | HJURP          | 4.01  | 7.13E-05 | 66.56  | 52.10  | 63.98  | 247.74 | 254.61 | 229.19 |
| 55388 | MCM10          | 2.25  | 3.75E-04 | 33.32  | 40.43  | 39.04  | 80.12  | 81.57  | 91.73  |
| 55536 | CDCA7L         | 1.69  | 5.39E-03 | 64.06  | 85.62  | 67.52  | 115.26 | 131.71 | 121.08 |
| 55612 | FERMT1         | 1.61  | 8.50E-03 | 46.39  | 35.91  | 50.07  | 72.17  | 72.16  | 69.41  |
| 55635 | DEPDC1         | 5.18  | 7.47E-04 | 17.40  | 11.54  | 21.25  | 88.53  | 86.82  | 84.41  |
| 55706 | TMEM48         | 1.68  | 6.83E-04 | 97.79  | 115.42 | 99.27  | 170.23 | 178.96 | 176.76 |
| 55711 | FAR2           | -1.62 | 9.10E-05 | 188.83 | 193.01 | 187.13 | 122.56 | 117.56 | 110.92 |
| 55714 | ODZ3           | -2.09 | 5.39E-05 | 196.08 | 201.97 | 206.09 | 96.73  | 90.10  | 102.72 |
| 55723 | ASF1B          | 2.97  | 4.00E-05 | 97.43  | 97.01  | 113.59 | 302.24 | 317.34 | 296.34 |
| 55732 | C1orf112       | 1.60  | 1.31E-04 | 18.98  | 21.12  | 20.15  | 32.81  | 31.85  | 31.86  |
| 55771 | PRR11          | 3.71  | 1.98E-03 | 107.63 | 62.81  | 111.51 | 349.20 | 337.16 | 358.29 |
| 55789 | DEPDC1B        | 1.93  | 4.37E-03 | 13.23  | 9.82   | 13.72  | 23.39  | 21.98  | 25.52  |
| 55790 | CSGALNAC<br>T1 | -2.15 | 2.73E-04 | 73.31  | 81.42  | 73.78  | 33.21  | 33.77  | 39.34  |

|       |          |       |          |         |         |         |        |        |        |
|-------|----------|-------|----------|---------|---------|---------|--------|--------|--------|
| 55839 | CENPN    | 1.87  | 5.97E-03 | 201.67  | 138.74  | 195.84  | 335.54 | 332.42 | 335.26 |
| 55859 | BEX1     | -2.98 | 1.03E-04 | 70.38   | 58.10   | 68.22   | 22.85  | 20.34  | 22.78  |
| 55872 | PBK      | 5.28  | 6.47E-04 | 36.18   | 22.25   | 38.89   | 173.25 | 171.56 | 168.78 |
| 56062 | KLHL4    | 2.16  | 2.41E-05 | 4.39    | 4.80    | 4.59    | 9.49   | 10.17  | 10.15  |
| 56106 | PCDHGA10 | -2.31 | 5.90E-03 | 177.14  | 286.42  | 187.58  | 92.52  | 92.59  | 96.66  |
| 56108 | PCDHGA7  | -1.87 | 1.09E-03 | 21.66   | 23.84   | 23.71   | 13.75  | 12.33  | 10.85  |
| 56109 | PCDHGA6  | -1.82 | 8.64E-03 | 15.08   | 19.93   | 16.34   | 10.05  | 7.76   | 10.44  |
| 56111 | PCDHGA4  | -2.11 | 7.03E-03 | 24.02   | 18.24   | 28.27   | 10.01  | 10.87  | 12.58  |
| 56112 | PCDHGA3  | -3.34 | 6.09E-05 | 47.22   | 38.82   | 46.71   | 13.17  | 12.69  | 13.84  |
| 56113 | PCDHGA2  | -1.51 | 1.71E-04 | 43.26   | 39.75   | 41.66   | 28.05  | 28.06  | 26.60  |
| 56114 | PCDHGA1  | -1.52 | 1.30E-03 | 40.71   | 39.59   | 43.82   | 27.24  | 25.24  | 29.23  |
| 56122 | PCDHB14  | -3.69 | 1.18E-03 | 102.82  | 157.39  | 100.14  | 30.36  | 31.16  | 36.12  |
| 56123 | PCDHB13  | -2.39 | 5.79E-04 | 18.32   | 24.35   | 22.66   | 9.09   | 8.86   | 9.39   |
| 56124 | PCDHB12  | -1.50 | 8.41E-03 | 9.98    | 11.20   | 9.77    | 5.93   | 7.34   | 7.41   |
| 56125 | PCDHB11  | -1.92 | 2.36E-07 | 17.38   | 17.40   | 17.17   | 9.04   | 8.86   | 9.10   |
| 56126 | PCDHB10  | -2.38 | 1.60E-03 | 20.66   | 30.35   | 23.81   | 10.46  | 10.43  | 10.53  |
| 56127 | PCDHB9   | -2.72 | 1.21E-03 | 61.17   | 87.42   | 63.55   | 28.21  | 24.86  | 24.84  |
| 56128 | PCDHB8   | -1.69 | 8.40E-03 | 6.57    | 7.44    | 7.36    | 4.86   | 3.42   | 4.35   |
| 56133 | PCDHB2   | -2.08 | 1.97E-03 | 58.63   | 81.94   | 67.95   | 35.07  | 31.90  | 33.05  |
| 56180 | MOSPD1   | -1.62 | 2.64E-03 | 261.93  | 217.83  | 230.14  | 155.61 | 149.89 | 133.10 |
| 56271 | BEX4     | -1.95 | 9.21E-05 | 307.84  | 295.83  | 302.30  | 144.02 | 155.95 | 165.60 |
| 56477 | CCL28    | 2.57  | 3.06E-05 | 57.19   | 53.37   | 62.21   | 145.85 | 148.53 | 150.50 |
| 56675 | NRIP3    | 1.63  | 1.93E-04 | 159.15  | 142.80  | 157.07  | 247.45 | 256.87 | 244.41 |
| 56947 | MFF      | -1.63 | 6.67E-04 | 977.73  | 821.42  | 888.98  | 552.59 | 544.16 | 554.42 |
| 56992 | KIF15    | 3.21  | 1.26E-04 | 14.22   | 10.97   | 12.97   | 42.13  | 38.91  | 41.61  |
| 56999 | ADAMTS9  | -2.04 | 3.08E-03 | 45.89   | 33.99   | 47.91   | 21.66  | 20.25  | 20.82  |
| 57082 | CASC5    | 4.41  | 1.36E-03 | 45.01   | 28.96   | 54.60   | 192.28 | 176.37 | 198.06 |
| 57125 | PLXDC1   | 3.71  | 1.69E-06 | 44.52   | 43.70   | 40.91   | 158.55 | 164.68 | 156.02 |
| 57194 | ATP10A   | -2.07 | 4.48E-03 | 66.01   | 49.08   | 74.45   | 30.52  | 30.44  | 30.44  |
| 57205 | ATP10D   | -1.70 | 1.02E-05 | 300.86  | 295.00  | 306.22  | 182.57 | 173.85 | 174.33 |
| 57211 | GPR126   | 1.78  | 6.99E-03 | 40.75   | 60.44   | 49.30   | 90.38  | 85.76  | 91.92  |
| 57214 | KIAA1199 | -1.77 | 9.95E-03 | 1425.26 | 1003.11 | 1449.65 | 734.49 | 712.74 | 745.33 |
| 57405 | SPC25    | 4.43  | 7.68E-06 | 19.05   | 17.52   | 20.47   | 80.68  | 87.03  | 85.23  |
| 57480 | PLEKHG1  | -2.21 | 6.35E-04 | 19.14   | 24.63   | 20.89   | 10.41  | 9.28   | 9.60   |
| 57520 | HECW2    | -2.57 | 7.22E-03 | 78.11   | 45.58   | 78.30   | 25.42  | 25.87  | 27.23  |
| 57522 | SRGAP1   | -1.54 | 2.59E-03 | 294.53  | 321.23  | 322.69  | 194.69 | 188.17 | 226.92 |
| 57542 | KLHDC5   | -1.59 | 8.68E-04 | 70.81   | 84.21   | 76.89   | 49.80  | 48.29  | 47.67  |
| 57546 | PDP2     | -1.52 | 1.29E-04 | 88.50   | 85.75   | 89.93   | 55.13  | 57.98  | 60.18  |
| 57556 | SEMA6A   | -2.24 | 6.73E-04 | 50.19   | 44.60   | 53.97   | 19.82  | 21.87  | 24.71  |
| 57580 | PREX1    | 1.64  | 7.03E-06 | 24.20   | 23.57   | 24.81   | 40.07  | 39.21  | 40.06  |
| 57639 | CCDC146  | -1.54 | 2.28E-03 | 23.78   | 26.57   | 29.11   | 16.89  | 16.67  | 17.89  |

|       |           |       |          |        |        |        |        |        |        |
|-------|-----------|-------|----------|--------|--------|--------|--------|--------|--------|
| 57643 | ZSWIM5    | -2.02 | 1.71E-03 | 100.32 | 85.89  | 117.06 | 49.47  | 48.33  | 52.56  |
| 57650 | KIAA1524  | 2.90  | 2.30E-05 | 53.65  | 54.47  | 61.99  | 160.62 | 166.92 | 165.24 |
| 57717 | PCDHB16   | -5.14 | 1.83E-04 | 119.35 | 159.84 | 109.59 | 26.14  | 26.36  | 23.13  |
| 58189 | WFDC1     | -1.76 | 1.43E-03 | 249.19 | 301.39 | 242.67 | 153.48 | 143.16 | 152.94 |
| 58538 | MPP4      | 1.85  | 5.83E-05 | 18.77  | 19.26  | 19.64  | 35.30  | 33.67  | 37.59  |
| 59084 | ENPP5     | -1.51 | 4.12E-04 | 86.89  | 78.46  | 86.56  | 57.04  | 53.58  | 55.88  |
| 59277 | NTN4      | -2.16 | 5.47E-06 | 136.24 | 145.23 | 135.32 | 63.31  | 64.61  | 64.96  |
| 60312 | AFAP1     | -1.72 | 3.21E-03 | 275.09 | 212.85 | 267.47 | 141.95 | 143.04 | 153.73 |
| 60489 | APOBEC3G  | -1.69 | 2.02E-04 | 39.80  | 38.52  | 42.33  | 24.28  | 24.68  | 22.43  |
| 63901 | FAM111A   | 1.60  | 5.68E-04 | 76.56  | 86.65  | 78.53  | 127.61 | 136.16 | 123.56 |
| 63967 | CLSPN     | 2.44  | 5.93E-03 | 29.32  | 18.96  | 33.51  | 66.61  | 67.20  | 65.51  |
| 64093 | SMOC1     | 3.30  | 1.94E-03 | 56.25  | 31.77  | 44.90  | 147.63 | 138.13 | 153.38 |
| 64105 | CENPK     | 2.14  | 1.01E-04 | 62.18  | 71.45  | 71.67  | 142.11 | 149.44 | 147.57 |
| 64151 | NCAPG     | 3.99  | 3.26E-05 | 65.54  | 63.02  | 76.66  | 283.24 | 256.78 | 279.23 |
| 64288 | ZNF323    | -1.51 | 2.31E-03 | 16.04  | 19.06  | 16.09  | 10.95  | 11.35  | 11.58  |
| 64641 | EBF2      | 1.73  | 7.96E-03 | 6.60   | 8.03   | 7.71   | 14.77  | 13.23  | 10.74  |
| 64759 | TNS3      | -1.73 | 5.26E-03 | 477.55 | 357.47 | 479.94 | 257.32 | 246.98 | 253.84 |
| 64785 | GIN53     | 1.81  | 5.81E-04 | 29.61  | 27.28  | 30.83  | 56.57  | 54.31  | 48.21  |
| 64847 | SPATA20   | -2.92 | 2.82E-05 | 317.03 | 336.17 | 308.03 | 106.30 | 119.28 | 103.77 |
| 64866 | CDCP1     | 2.34  | 2.56E-04 | 196.13 | 238.85 | 242.89 | 542.19 | 518.20 | 527.04 |
| 64901 | RANBP17   | 1.78  | 2.13E-04 | 11.00  | 11.77  | 11.27  | 21.64  | 18.83  | 20.10  |
| 64943 | NT5DC2    | 1.51  | 3.78E-05 | 553.68 | 576.26 | 586.36 | 882.12 | 857.73 | 847.82 |
| 64946 | CENPH     | 2.33  | 9.32E-04 | 17.04  | 12.99  | 13.16  | 31.62  | 32.73  | 36.16  |
| 65997 | RASL11B   | -2.08 | 2.89E-03 | 49.87  | 66.44  | 46.91  | 24.73  | 26.28  | 27.36  |
| 78995 | C17orf53  | 1.72  | 1.45E-03 | 36.81  | 42.58  | 46.26  | 69.59  | 74.52  | 71.59  |
| 79019 | CENPM     | 1.88  | 3.98E-03 | 39.51  | 28.95  | 36.14  | 59.23  | 71.09  | 65.95  |
| 79056 | PRRG4     | 2.11  | 1.49E-03 | 24.82  | 20.55  | 27.67  | 50.91  | 55.27  | 47.67  |
| 79153 | GDPD3     | 1.63  | 5.19E-03 | 15.29  | 12.11  | 13.82  | 21.30  | 25.12  | 20.96  |
| 79154 | DHRS11    | 1.52  | 2.69E-03 | 80.48  | 71.90  | 89.57  | 121.33 | 123.37 | 122.78 |
| 79172 | CENPO     | 1.84  | 4.34E-04 | 69.70  | 62.24  | 74.42  | 122.96 | 132.56 | 124.25 |
| 79365 | BHLHE41   | 1.51  | 7.91E-05 | 74.94  | 79.13  | 74.31  | 115.28 | 117.25 | 111.38 |
| 79603 | LASS4     | 1.99  | 1.25E-04 | 33.94  | 32.09  | 33.40  | 62.34  | 63.58  | 71.67  |
| 79633 | FAT4      | -1.67 | 4.70E-03 | 225.47 | 253.46 | 244.27 | 137.65 | 126.97 | 168.56 |
| 79652 | TMEM204   | -1.63 | 8.85E-04 | 300.84 | 313.66 | 313.46 | 175.83 | 210.09 | 184.04 |
| 79659 | DYNC2H1   | -1.83 | 3.34E-03 | 48.28  | 49.71  | 56.61  | 30.00  | 23.67  | 30.86  |
| 79674 | VEPH1     | 1.82  | 1.45E-03 | 56.02  | 43.30  | 51.32  | 94.77  | 89.61  | 90.29  |
| 79682 | MLF1IP    | 3.17  | 5.69E-05 | 83.45  | 68.98  | 80.29  | 259.95 | 240.72 | 237.58 |
| 79686 | C14orf139 | -1.55 | 2.78E-03 | 117.61 | 104.26 | 125.87 | 80.18  | 70.81  | 74.00  |
| 79733 | E2F8      | 3.01  | 2.01E-07 | 15.87  | 15.67  | 15.26  | 47.62  | 46.07  | 46.97  |
| 79750 | ZNF385D   | 2.09  | 2.16E-04 | 83.18  | 100.96 | 88.66  | 186.66 | 193.75 | 190.60 |
| 79789 | CLMN      | 1.57  | 8.12E-04 | 7.48   | 6.99   | 7.96   | 11.03  | 11.81  | 12.33  |

|       |          |       |          |        |        |        |         |         |         |
|-------|----------|-------|----------|--------|--------|--------|---------|---------|---------|
| 79801 | SHCBP1   | 3.66  | 1.40E-04 | 63.04  | 50.03  | 67.29  | 226.62  | 214.55  | 218.41  |
| 79822 | ARHGAP28 | 1.75  | 2.07E-03 | 37.02  | 30.44  | 31.11  | 61.57   | 52.23   | 58.56   |
| 79834 | SGK269   | -1.57 | 4.28E-04 | 374.43 | 413.53 | 369.80 | 237.38  | 241.71  | 256.28  |
| 79866 | C13orf34 | 1.73  | 5.19E-05 | 19.08  | 20.92  | 20.14  | 35.49   | 33.97   | 34.39   |
| 79905 | TMC7     | 2.37  | 1.06E-04 | 59.59  | 54.26  | 64.88  | 136.86  | 139.15  | 147.53  |
| 79968 | WDR76    | 2.14  | 1.58E-04 | 88.27  | 92.14  | 80.26  | 191.86  | 194.24  | 172.82  |
| 79974 | C7orf58  | -1.51 | 5.85E-03 | 405.27 | 338.39 | 437.01 | 260.34  | 259.09  | 262.09  |
| 79980 | DSN1     | 1.80  | 1.13E-04 | 102.80 | 112.39 | 107.30 | 192.01  | 203.43  | 183.99  |
| 80010 | RMI1     | 1.92  | 6.09E-06 | 27.83  | 28.65  | 27.71  | 55.19   | 54.18   | 51.96   |
| 80071 | CCDC15   | 1.77  | 6.06E-03 | 7.76   | 10.95  | 10.23  | 17.32   | 17.82   | 16.12   |
| 80176 | SPSB1    | -1.50 | 2.61E-03 | 167.01 | 172.30 | 145.45 | 104.63  | 114.27  | 103.41  |
| 80210 | ARMC9    | -1.52 | 1.25E-05 | 313.08 | 300.64 | 302.37 | 199.96  | 204.74  | 198.21  |
| 80310 | PDGFD    | -1.99 | 2.36E-03 | 34.79  | 44.31  | 35.63  | 17.06   | 19.45   | 21.22   |
| 80315 | CPEB4    | -2.17 | 2.02E-03 | 115.73 | 159.13 | 129.70 | 57.60   | 60.35   | 68.80   |
| 80323 | CCDC68   | -2.72 | 3.03E-04 | 116.34 | 104.55 | 138.89 | 45.18   | 42.63   | 44.67   |
| 80339 | PNPLA3   | -2.19 | 1.42E-03 | 87.09  | 63.10  | 79.53  | 36.60   | 33.95   | 34.51   |
| 80704 | SLC19A3  | -1.70 | 2.02E-03 | 21.79  | 18.28  | 22.40  | 12.74   | 11.40   | 12.70   |
| 81031 | SLC2A10  | -1.66 | 8.00E-03 | 222.15 | 306.12 | 234.43 | 153.75  | 148.67  | 158.21  |
| 81610 | FAM83D   | 2.94  | 1.15E-03 | 61.62  | 43.09  | 65.56  | 164.38  | 163.46  | 172.70  |
| 81624 | DIAPH3   | 2.84  | 3.07E-03 | 61.95  | 39.98  | 68.67  | 155.86  | 166.64  | 161.29  |
| 81691 | LOC81691 | 2.10  | 3.65E-03 | 42.59  | 31.43  | 47.19  | 81.79   | 84.61   | 88.60   |
| 81831 | NETO2    | 2.88  | 3.65E-03 | 121.43 | 73.58  | 128.09 | 321.47  | 298.84  | 308.67  |
| 81832 | NETO1    | -3.34 | 1.35E-03 | 17.89  | 26.83  | 16.93  | 5.91    | 6.01    | 6.57    |
| 81851 | KRTAP1-1 | 2.64  | 5.38E-03 | 225.56 | 130.00 | 222.78 | 503.90  | 524.57  | 496.75  |
| 83461 | CDCA3    | 3.30  | 2.48E-04 | 30.24  | 22.17  | 28.67  | 92.18   | 88.61   | 86.75   |
| 83463 | MXD3     | 1.54  | 1.53E-03 | 46.44  | 40.05  | 47.46  | 70.90   | 69.34   | 66.42   |
| 83540 | NUF2     | 6.10  | 2.17E-05 | 19.72  | 15.59  | 19.15  | 117.06  | 108.27  | 106.77  |
| 83543 | AIF1L    | 3.40  | 2.62E-04 | 20.15  | 15.78  | 21.52  | 60.97   | 65.23   | 69.22   |
| 83716 | CRISPLD2 | -2.73 | 1.24E-03 | 471.21 | 320.01 | 442.02 | 144.77  | 153.88  | 153.87  |
| 83857 | TMTC1    | -1.61 | 9.87E-04 | 832.11 | 707.27 | 780.82 | 468.84  | 466.35  | 507.99  |
| 83872 | HMCN1    | -2.48 | 4.68E-04 | 39.48  | 35.45  | 40.74  | 16.28   | 13.33   | 17.08   |
| 83879 | CDCA7    | 2.17  | 1.87E-04 | 13.03  | 12.53  | 10.92  | 27.11   | 25.15   | 26.94   |
| 83895 | KRTAP1-5 | 3.31  | 5.74E-04 | 296.31 | 444.82 | 337.33 | 1185.64 | 1238.11 | 1147.63 |
| 83903 | GSG2     | 1.66  | 1.43E-03 | 30.97  | 26.46  | 28.05  | 43.17   | 48.83   | 50.06   |
| 83935 | TMEM133  | 1.92  | 1.93E-03 | 88.29  | 113.56 | 116.47 | 195.02  | 206.70  | 210.00  |
| 83956 | RACGAP1P | 1.83  | 3.86E-03 | 6.76   | 6.52   | 7.74   | 14.01   | 13.64   | 10.73   |
| 83987 | CCDC8    | 1.55  | 2.48E-03 | 26.16  | 23.76  | 24.83  | 42.76   | 35.08   | 37.80   |
| 83990 | BRIP1    | 1.77  | 2.09E-03 | 33.09  | 42.08  | 35.91  | 61.62   | 64.51   | 70.64   |
| 84002 | B3GNT5   | 1.71  | 7.66E-03 | 44.25  | 33.29  | 41.69  | 67.81   | 75.56   | 60.30   |
| 84057 | MND1     | 3.11  | 2.51E-04 | 10.36  | 11.60  | 13.65  | 36.10   | 40.35   | 34.48   |
| 84058 | WDR54    | 1.61  | 1.09E-03 | 128.98 | 155.07 | 133.84 | 223.84  | 226.29  | 221.10  |



|       |            |       |          |        |        |        |        |        |        |
|-------|------------|-------|----------|--------|--------|--------|--------|--------|--------|
| 84197 | SGK196     | -1.55 | 2.90E-03 | 212.99 | 260.11 | 237.52 | 146.68 | 148.13 | 163.39 |
| 84216 | TMEM117    | -1.64 | 8.47E-04 | 112.72 | 129.08 | 113.81 | 74.46  | 75.04  | 67.72  |
| 84251 | SGIP1      | -2.30 | 5.77E-04 | 276.20 | 346.66 | 279.31 | 132.24 | 138.68 | 121.58 |
| 84288 | EFCAB2     | -1.56 | 9.04E-04 | 39.39  | 39.86  | 34.78  | 25.43  | 23.33  | 24.34  |
| 84293 | C10orf58   | 2.20  | 1.46E-03 | 7.14   | 9.76   | 7.92   | 19.43  | 18.52  | 16.74  |
| 84296 | GIN54      | 1.94  | 4.43E-03 | 57.58  | 44.59  | 62.87  | 113.76 | 110.35 | 95.90  |
| 84441 | MAML2      | -1.65 | 5.18E-05 | 392.88 | 366.76 | 389.35 | 228.31 | 240.39 | 229.43 |
| 84456 | L3MBTL3    | -1.56 | 3.92E-04 | 60.07  | 53.43  | 58.41  | 35.95  | 38.19  | 36.05  |
| 84515 | MCM8       | 1.86  | 4.32E-03 | 109.81 | 82.99  | 117.99 | 195.54 | 187.54 | 194.10 |
| 84649 | DGAT2      | 1.94  | 1.61E-03 | 53.54  | 43.25  | 51.13  | 106.60 | 87.93  | 92.01  |
| 84675 | TRIM55     | 2.62  | 2.40E-04 | 17.09  | 15.43  | 16.70  | 39.60  | 40.15  | 49.26  |
| 84681 | HINT2      | 1.50  | 4.12E-03 | 258.08 | 285.32 | 226.52 | 397.55 | 376.59 | 378.34 |
| 84795 | PYROXD2    | -1.89 | 6.70E-03 | 72.15  | 88.96  | 58.76  | 37.88  | 39.07  | 39.52  |
| 84870 | RSPO3      | 1.90  | 1.44E-03 | 96.42  | 121.94 | 108.36 | 189.58 | 222.58 | 207.78 |
| 84898 | PLXDC2     | -2.46 | 7.32E-04 | 350.25 | 455.37 | 336.51 | 157.91 | 152.93 | 153.45 |
| 84900 | RNFT2      | 2.01  | 2.36E-04 | 42.07  | 50.09  | 43.48  | 89.92  | 93.85  | 88.77  |
| 84930 | MASTL      | 1.55  | 2.82E-03 | 160.61 | 137.21 | 172.23 | 247.56 | 242.00 | 240.06 |
| 84952 | CGNL1      | 2.42  | 2.08E-04 | 9.29   | 8.53   | 8.29   | 18.97  | 20.89  | 23.28  |
| 84969 | TOX2       | 1.59  | 4.21E-04 | 38.64  | 38.76  | 34.37  | 57.24  | 59.56  | 60.59  |
| 85004 | RERG       | 1.76  | 6.77E-03 | 8.06   | 9.60   | 11.81  | 16.65  | 17.37  | 17.78  |
| 85235 | HIST1H2AH  | 2.76  | 6.60E-04 | 8.25   | 8.44   | 8.87   | 20.71  | 28.55  | 21.31  |
| 85444 | LRRCC1     | 1.78  | 2.81E-03 | 52.15  | 42.46  | 50.61  | 92.91  | 88.93  | 76.22  |
| 85461 | TANC1      | -1.68 | 1.42E-03 | 130.31 | 159.36 | 136.07 | 81.39  | 84.17  | 88.18  |
| 85463 | ZC3H12C    | -1.91 | 2.25E-04 | 145.36 | 170.77 | 161.40 | 82.86  | 80.40  | 86.12  |
| 89891 | WDR34      | 1.51  | 9.68E-05 | 153.35 | 159.20 | 155.49 | 237.83 | 242.60 | 224.20 |
| 90102 | PHLDB2     | -1.84 | 5.91E-03 | 137.59 | 96.48  | 130.76 | 67.61  | 64.21  | 66.53  |
| 90381 | C15orf42   | 2.60  | 3.95E-03 | 27.80  | 18.68  | 31.89  | 66.91  | 64.49  | 72.64  |
| 90417 | C15orf23   | 2.06  | 1.37E-03 | 135.72 | 110.12 | 149.28 | 278.23 | 260.62 | 275.46 |
| 90865 | IL33       | -2.66 | 4.42E-03 | 210.08 | 129.15 | 209.07 | 73.30  | 67.51  | 65.08  |
| 91057 | CCDC34     | 1.61  | 1.13E-03 | 43.50  | 36.24  | 37.82  | 63.57  | 64.33  | 61.10  |
| 91368 | CDKN2AIPNL | 1.51  | 5.58E-03 | 250.69 | 193.30 | 216.83 | 342.28 | 326.31 | 328.16 |
| 91526 | ANKRD44    | -1.59 | 9.18E-04 | 46.77  | 46.54  | 48.10  | 31.84  | 26.75  | 30.34  |
| 91687 | CENPL      | 1.54  | 2.72E-03 | 28.42  | 25.03  | 24.27  | 39.77  | 36.98  | 43.14  |
| 91752 | ZNF804A    | -1.79 | 5.35E-03 | 62.72  | 89.79  | 75.99  | 42.61  | 42.38  | 42.89  |
| 92126 | DSEL       | -1.50 | 8.96E-04 | 919.30 | 985.23 | 889.77 | 630.37 | 579.86 | 651.46 |
| 92667 | C20orf72   | 1.82  | 2.52E-04 | 51.25  | 57.45  | 49.78  | 95.52  | 100.27 | 93.02  |
| 92737 | DNER       | -1.58 | 3.20E-04 | 59.29  | 54.09  | 60.26  | 37.38  | 37.48  | 35.20  |
| 93100 | NAPRT1     | -1.52 | 1.96E-03 | 117.52 | 111.44 | 106.41 | 80.99  | 68.34  | 71.89  |
| 93166 | PRDM6      | 1.89  | 2.64E-04 | 33.49  | 28.48  | 28.82  | 57.65  | 57.72  | 56.39  |
| 93323 | HAUS8      | 1.62  | 3.59E-04 | 17.31  | 15.00  | 16.44  | 26.63  | 25.78  | 26.45  |
| 93517 | SDR42E1    | 2.10  | 2.48E-03 | 18.54  | 16.42  | 21.43  | 39.94  | 34.05  | 44.55  |

|        |          |       |          |        |        |        |        |        |        |
|--------|----------|-------|----------|--------|--------|--------|--------|--------|--------|
| 112574 | SNX18    | -1.62 | 3.41E-05 | 103.58 | 112.22 | 108.42 | 66.47  | 66.77  | 67.35  |
| 113115 | FAM54A   | 2.42  | 3.60E-04 | 14.88  | 13.95  | 15.19  | 35.56  | 30.91  | 39.92  |
| 113130 | CDCA5    | 2.39  | 1.11E-03 | 28.07  | 24.15  | 34.25  | 72.49  | 68.22  | 65.73  |
| 113835 | ZNF257   | 1.73  | 9.18E-03 | 3.46   | 2.73   | 3.99   | 5.49   | 6.29   | 5.81   |
| 114134 | SLC2A13  | -1.74 | 7.71E-03 | 207.37 | 165.23 | 239.11 | 118.94 | 112.88 | 120.02 |
| 114795 | TMEM132B | 1.58  | 1.09E-03 | 34.58  | 33.41  | 33.89  | 55.45  | 57.25  | 48.18  |
| 114804 | RNF157   | 2.41  | 9.17E-03 | 43.18  | 77.49  | 44.41  | 132.67 | 140.41 | 124.02 |
| 114897 | C1QTNF1  | -1.66 | 5.13E-05 | 196.01 | 203.58 | 186.98 | 116.16 | 120.86 | 117.17 |
| 114898 | C1QTNF2  | 2.38  | 7.41E-05 | 69.06  | 71.72  | 80.77  | 176.09 | 169.24 | 182.28 |
| 114899 | C1QTNF3  | 1.51  | 9.11E-04 | 9.48   | 9.91   | 10.02  | 15.03  | 15.70  | 13.58  |
| 115701 | ALPK2    | -1.83 | 1.74E-05 | 31.98  | 33.59  | 30.86  | 17.59  | 17.73  | 17.49  |
| 115752 | DIS3L    | 1.58  | 4.70E-03 | 46.32  | 51.25  | 40.13  | 76.70  | 73.58  | 67.24  |
| 116093 | DIRC1    | -2.02 | 2.46E-03 | 14.36  | 18.98  | 13.85  | 7.47   | 8.02   | 7.92   |
| 116496 | FAM129A  | 1.89  | 3.29E-05 | 217.33 | 197.36 | 210.55 | 387.15 | 390.62 | 403.20 |
| 116832 | RPL39L   | 2.12  | 1.11E-04 | 22.17  | 22.55  | 20.46  | 43.10  | 49.37  | 45.62  |
| 117854 | TRIM6    | 1.81  | 3.36E-03 | 40.76  | 36.13  | 31.21  | 60.14  | 62.76  | 72.30  |
| 120892 | LRRK2    | -1.61 | 2.98E-03 | 50.74  | 43.42  | 55.25  | 30.00  | 30.79  | 32.06  |
| 121601 | ANO4     | -2.17 | 4.73E-04 | 135.28 | 115.75 | 106.72 | 52.95  | 57.49  | 54.59  |
| 122402 | TDRD9    | 1.63  | 2.18E-03 | 3.17   | 3.71   | 3.85   | 5.94   | 5.42   | 6.09   |
| 122704 | MRPL52   | 1.52  | 4.47E-05 | 57.86  | 53.96  | 54.56  | 85.32  | 84.39  | 83.96  |
| 122769 | PPIL5    | 2.07  | 1.65E-04 | 26.93  | 31.17  | 31.89  | 62.94  | 62.48  | 61.29  |
| 126820 | WDR63    | -1.79 | 4.50E-03 | 57.04  | 42.86  | 56.85  | 30.92  | 27.88  | 28.84  |
| 127435 | PODN     | -2.38 | 4.16E-04 | 994.83 | 785.02 | 991.31 | 398.94 | 379.57 | 385.52 |
| 128239 | IQGAP3   | 4.86  | 1.30E-04 | 32.46  | 23.89  | 33.03  | 149.70 | 148.46 | 136.24 |
| 128553 | TSHZ2    | 2.10  | 1.68E-03 | 19.37  | 17.56  | 21.60  | 44.89  | 34.90  | 43.24  |
| 130271 | PLEKHH2  | -1.82 | 1.41E-04 | 102.89 | 95.03  | 99.52  | 50.77  | 56.46  | 56.37  |
| 130576 | LYPD6B   | -2.25 | 9.34E-04 | 26.69  | 24.10  | 24.17  | 9.89   | 10.33  | 13.09  |
| 131578 | LRRC15   | -1.99 | 2.82E-05 | 245.32 | 267.47 | 255.72 | 129.60 | 133.11 | 124.22 |
| 131873 | COL6A6   | -1.65 | 1.20E-03 | 46.34  | 46.50  | 44.11  | 28.62  | 24.50  | 29.73  |
| 132299 | OCIAD2   | 1.86  | 3.74E-03 | 40.72  | 54.88  | 40.31  | 86.15  | 85.83  | 80.33  |
| 133383 | C5orf35  | 1.60  | 3.25E-03 | 12.31  | 14.42  | 11.21  | 20.87  | 19.89  | 19.89  |
| 134492 | NUDCD2   | 1.53  | 3.05E-03 | 28.54  | 22.75  | 24.98  | 38.09  | 39.75  | 38.76  |
| 137835 | TMEM71   | 3.05  | 8.82E-04 | 12.07  | 15.46  | 13.81  | 38.54  | 51.01  | 36.74  |
| 140862 | ISM1     | -2.91 | 9.21E-03 | 170.89 | 92.74  | 174.25 | 43.37  | 51.50  | 55.45  |
| 143872 | ARHGAP42 | 1.90  | 2.05E-03 | 183.20 | 222.87 | 249.44 | 406.45 | 414.19 | 422.26 |
| 144455 | E2F7     | 1.58  | 5.89E-04 | 50.36  | 53.06  | 58.34  | 86.11  | 82.42  | 87.53  |
| 144535 | C12orf55 | 2.34  | 1.06E-04 | 20.25  | 19.82  | 18.23  | 41.98  | 49.08  | 45.17  |
| 144811 | C13orf31 | -1.66 | 2.02E-04 | 52.67  | 49.38  | 46.75  | 29.53  | 30.86  | 28.99  |
| 146434 | ZNF597   | -1.71 | 2.60E-03 | 69.43  | 89.19  | 79.69  | 46.10  | 49.32  | 44.08  |
| 146909 | KIF18B   | 2.19  | 4.32E-04 | 24.62  | 20.77  | 26.38  | 54.64  | 51.30  | 51.56  |
| 146956 | EME1     | 2.38  | 3.99E-04 | 14.06  | 13.29  | 16.84  | 32.78  | 36.98  | 35.38  |

|        |           |       |          |        |        |        |        |        |        |
|--------|-----------|-------|----------|--------|--------|--------|--------|--------|--------|
| 147495 | APCDD1    | 1.95  | 3.37E-03 | 97.41  | 133.12 | 94.83  | 214.78 | 211.86 | 208.42 |
| 148206 | ZNF714    | 1.56  | 2.73E-03 | 35.40  | 29.55  | 34.96  | 55.47  | 49.56  | 50.73  |
| 148523 | C1orf51   | 1.63  | 9.87E-04 | 40.55  | 35.89  | 43.19  | 63.35  | 67.33  | 64.82  |
| 150468 | CKAP2L    | 4.40  | 3.98E-04 | 38.28  | 31.97  | 50.47  | 188.08 | 167.13 | 175.98 |
| 151246 | SGOL2     | 2.40  | 6.24E-03 | 57.20  | 36.47  | 63.53  | 124.39 | 122.19 | 130.70 |
| 151648 | SGOL1     | 4.24  | 4.89E-04 | 17.32  | 13.82  | 22.22  | 79.37  | 70.98  | 75.69  |
| 153769 | SH3RF2    | 2.60  | 5.22E-03 | 53.19  | 32.86  | 57.35  | 120.82 | 133.14 | 119.34 |
| 155368 | WBSCR27   | 1.84  | 2.32E-04 | 56.84  | 56.59  | 55.10  | 94.59  | 103.36 | 111.38 |
| 157313 | CDCA2     | 2.26  | 7.21E-03 | 56.99  | 39.62  | 69.94  | 126.48 | 125.62 | 123.81 |
| 157570 | ESCO2     | 3.41  | 5.81E-04 | 55.47  | 36.84  | 50.68  | 168.46 | 159.23 | 160.52 |
| 158158 | RASEF     | 1.51  | 5.93E-04 | 11.02  | 11.74  | 11.45  | 16.97  | 18.37  | 16.18  |
| 160857 | CCDC122   | -1.67 | 1.66E-03 | 36.15  | 43.46  | 37.90  | 21.79  | 24.87  | 23.84  |
| 161176 | C14orf49  | -1.54 | 6.87E-04 | 80.86  | 80.95  | 82.03  | 50.03  | 50.54  | 57.63  |
| 161198 | CLEC14A   | -2.73 | 3.67E-03 | 41.68  | 68.84  | 46.07  | 21.03  | 17.83  | 18.49  |
| 161291 | TMEM30B   | 1.55  | 1.00E-03 | 63.91  | 62.50  | 73.07  | 100.82 | 105.97 | 102.02 |
| 161357 | MDGA2     | -2.49 | 1.68E-03 | 13.95  | 11.60  | 17.05  | 5.78   | 6.11   | 5.25   |
| 162681 | C18orf54  | 2.30  | 4.64E-03 | 21.76  | 16.21  | 26.91  | 51.79  | 47.14  | 50.60  |
| 163786 | SASS6     | 1.94  | 5.12E-04 | 23.89  | 27.71  | 29.62  | 54.23  | 51.59  | 52.07  |
| 167359 | MGC42105  | 1.91  | 5.08E-04 | 16.12  | 15.79  | 17.70  | 34.73  | 29.18  | 30.62  |
| 167681 | PRSS35    | -2.08 | 8.56E-04 | 66.13  | 56.79  | 62.80  | 32.15  | 31.41  | 25.90  |
| 169792 | GLIS3     | -2.05 | 5.20E-05 | 175.98 | 184.25 | 188.51 | 85.30  | 87.37  | 95.25  |
| 192683 | SCAMP5    | -2.18 | 2.35E-04 | 97.98  | 96.22  | 101.67 | 45.74  | 40.46  | 49.80  |
| 195828 | ZNF367    | 2.18  | 6.53E-03 | 56.59  | 94.72  | 66.99  | 163.01 | 149.52 | 163.91 |
| 196051 | PPAPDC1A  | -3.67 | 4.23E-06 | 130.91 | 120.05 | 127.12 | 33.20  | 33.52  | 36.26  |
| 199777 | ZNF626    | -1.50 | 1.68E-03 | 177.78 | 170.23 | 153.30 | 118.15 | 106.52 | 109.08 |
| 219621 | C10orf107 | -3.78 | 3.97E-05 | 30.39  | 24.29  | 26.82  | 6.99   | 7.10   | 7.45   |
| 219844 | HYLS1     | 2.05  | 6.93E-03 | 18.52  | 12.44  | 16.54  | 36.16  | 33.58  | 27.77  |
| 220042 | C11orf82  | 2.01  | 2.58E-04 | 26.65  | 25.85  | 30.91  | 54.86  | 54.96  | 57.43  |
| 220134 | SKA1      | 3.89  | 3.33E-04 | 25.15  | 18.96  | 27.05  | 97.07  | 96.49  | 83.17  |
| 220441 | RNF152    | -2.39 | 7.74E-04 | 188.28 | 189.89 | 236.34 | 76.07  | 89.00  | 91.82  |
| 220963 | SLC16A9   | 1.73  | 4.10E-03 | 8.13   | 6.10   | 7.83   | 13.33  | 12.67  | 12.19  |
| 220965 | FAM13C    | 1.72  | 5.44E-03 | 25.75  | 33.20  | 24.17  | 49.37  | 45.10  | 48.58  |
| 221079 | ARL5B     | -1.58 | 3.37E-03 | 210.45 | 270.42 | 236.67 | 148.64 | 153.11 | 151.20 |
| 221150 | SKA3      | 3.75  | 5.55E-04 | 35.05  | 29.56  | 46.11  | 144.13 | 141.38 | 129.93 |
| 221184 | CPNE2     | 1.57  | 6.72E-03 | 136.72 | 183.07 | 148.46 | 249.18 | 250.25 | 235.90 |
| 221662 | RBM24     | -1.57 | 5.42E-03 | 32.12  | 39.57  | 38.37  | 21.17  | 24.74  | 24.33  |
| 221756 | MGC39372  | 2.14  | 4.78E-04 | 13.17  | 15.62  | 15.51  | 32.80  | 28.67  | 33.19  |
| 221935 | SDK1      | 2.04  | 1.36E-03 | 19.54  | 15.17  | 17.88  | 33.19  | 34.77  | 39.45  |
| 246777 | SPESP1    | -2.70 | 2.57E-05 | 12.61  | 13.94  | 12.40  | 4.74   | 5.07   | 4.64   |
| 259266 | ASPM      | 5.43  | 7.92E-04 | 32.11  | 19.43  | 35.62  | 157.56 | 151.91 | 164.21 |
| 283209 | PGM2L1    | -1.74 | 1.22E-03 | 150.81 | 130.73 | 158.24 | 81.04  | 80.97  | 90.27  |

|        |           |       |          |        |        |        |        |        |        |
|--------|-----------|-------|----------|--------|--------|--------|--------|--------|--------|
| 283383 | GPR133    | -2.10 | 2.95E-03 | 55.80  | 39.57  | 54.11  | 22.79  | 23.63  | 24.89  |
| 283431 | GAS2L3    | 2.22  | 3.29E-05 | 91.08  | 85.83  | 92.39  | 211.70 | 191.24 | 194.50 |
| 284371 | ZNF841    | -1.60 | 9.05E-05 | 63.17  | 67.12  | 67.38  | 40.85  | 39.77  | 42.73  |
| 284403 | WDR62     | 1.88  | 5.08E-04 | 27.64  | 24.89  | 27.80  | 51.56  | 53.90  | 45.63  |
| 284612 | SYPL2     | -1.62 | 2.72E-03 | 66.03  | 80.54  | 65.90  | 41.19  | 45.60  | 44.02  |
| 285025 | CCDC141   | 1.55  | 9.14E-03 | 5.26   | 4.15   | 4.69   | 8.15   | 6.60   | 7.09   |
| 285440 | CYP4V2    | 1.73  | 7.00E-05 | 222.96 | 216.08 | 221.89 | 404.17 | 372.28 | 366.04 |
| 285643 | KIF4B     | 2.07  | 2.28E-04 | 11.61  | 11.24  | 12.77  | 23.66  | 26.74  | 23.36  |
| 286097 | EFHA2     | -1.68 | 5.57E-06 | 59.99  | 60.11  | 61.84  | 36.75  | 35.19  | 36.27  |
| 286826 | LIN9      | 1.77  | 3.73E-03 | 14.31  | 19.23  | 18.28  | 31.56  | 28.93  | 31.04  |
| 286827 | TRIM59    | 2.60  | 8.34E-05 | 50.27  | 46.24  | 53.84  | 138.27 | 131.19 | 121.01 |
| 317772 | HIST2H2AB | 2.81  | 2.95E-05 | 130.25 | 145.36 | 152.47 | 405.15 | 407.91 | 389.16 |
| 337875 | HIST2H2BA | 2.04  | 2.90E-03 | 493.24 | 347.98 | 452.16 | 938.79 | 877.91 | 824.56 |
| 339834 | CCDC36    | 1.62  | 5.97E-03 | 16.73  | 14.05  | 15.57  | 25.15  | 28.14  | 21.77  |
| 343099 | CCDC18    | 1.51  | 6.40E-03 | 13.92  | 15.90  | 12.18  | 20.53  | 22.17  | 20.90  |
| 344887 | LOC344887 | -1.76 | 2.78E-03 | 39.99  | 41.74  | 34.68  | 24.98  | 20.59  | 20.40  |
| 345557 | PLCXD3    | 3.36  | 1.05E-03 | 16.94  | 11.25  | 17.46  | 54.02  | 50.85  | 48.72  |
| 346171 | ZFP57     | 2.17  | 9.72E-04 | 12.31  | 10.24  | 9.64   | 23.65  | 25.04  | 21.05  |
| 347240 | KIF24     | 1.64  | 4.98E-03 | 11.57  | 10.69  | 13.76  | 17.87  | 20.20  | 20.99  |
| 348093 | RBPM52    | 1.70  | 6.56E-04 | 45.77  | 38.71  | 39.03  | 68.75  | 71.01  | 69.81  |
| 348654 | GEN1      | 1.71  | 1.15E-04 | 52.33  | 55.29  | 50.40  | 91.29  | 86.03  | 93.05  |
| 353139 | LCE2A     | 3.17  | 6.75E-04 | 189.54 | 249.05 | 181.43 | 597.07 | 749.43 | 619.86 |
| 374393 | FAM111B   | 3.37  | 3.69E-05 | 33.03  | 37.01  | 39.89  | 129.05 | 123.90 | 117.80 |
| 374467 | C12orf63  | 4.26  | 3.69E-04 | 4.64   | 3.81   | 5.54   | 22.80  | 17.78  | 19.08  |
| 375444 | C5orf34   | 1.51  | 6.36E-03 | 20.15  | 16.87  | 17.72  | 30.30  | 24.81  | 27.41  |
| 386618 | KCTD4     | 3.05  | 6.79E-04 | 13.65  | 11.14  | 10.00  | 35.73  | 30.68  | 39.53  |
| 387103 | CENPW     | 2.55  | 1.69E-04 | 14.15  | 12.60  | 15.97  | 36.75  | 35.64  | 36.37  |
| 387496 | RASL11A   | 1.54  | 1.94E-03 | 50.13  | 45.45  | 54.79  | 81.33  | 74.79  | 75.56  |
| 388272 | C16orf87  | -1.77 | 2.65E-03 | 90.10  | 101.26 | 115.99 | 52.80  | 60.49  | 60.19  |
| 388566 | ZNF470    | -1.58 | 4.15E-04 | 37.94  | 40.87  | 41.18  | 26.56  | 25.51  | 23.68  |
| 389432 | SAMD5     | -2.03 | 4.55E-04 | 21.32  | 25.54  | 26.06  | 11.72  | 12.45  | 11.82  |
| 390980 | ZNF805    | -1.64 | 1.14E-03 | 81.66  | 75.79  | 87.92  | 49.74  | 46.42  | 53.51  |
| 399694 | SHC4      | -2.94 | 5.83E-03 | 56.27  | 109.60 | 75.30  | 26.47  | 27.04  | 28.49  |
| 400451 | FAM174B   | 1.89  | 3.98E-03 | 33.29  | 32.95  | 34.16  | 50.80  | 70.94  | 67.55  |
| 401207 | FLJ44606  | 1.52  | 6.70E-03 | 22.75  | 27.24  | 22.48  | 34.34  | 35.27  | 40.73  |
| 401233 | LOC401233 | -3.17 | 4.47E-04 | 44.72  | 62.78  | 58.02  | 16.56  | 17.04  | 18.55  |
| 414149 | ACBD7     | 1.52  | 2.79E-03 | 6.45   | 5.44   | 6.71   | 9.44   | 9.34   | 9.47   |
| 440993 | LOC440993 | -1.53 | 5.00E-05 | 42.11  | 40.32  | 41.99  | 27.58  | 27.72  | 26.19  |
| 441631 | TSPAN11   | -2.85 | 7.20E-03 | 86.37  | 157.81 | 88.69  | 36.53  | 41.04  | 39.12  |
| 442213 | C6orf138  | -2.30 | 4.01E-04 | 56.71  | 67.67  | 55.84  | 27.83  | 26.69  | 23.98  |
| 574449 | MIR492    | 1.55  | 9.05E-03 | 7.33   | 5.63   | 5.83   | 10.49  | 9.67   | 9.00   |

|        |              |       |          |         |         |         |         |         |         |
|--------|--------------|-------|----------|---------|---------|---------|---------|---------|---------|
| 643853 | TMPPE        | -1.50 | 3.11E-03 | 44.60   | 47.46   | 43.61   | 29.59   | 33.49   | 27.36   |
| 644128 | RPL23AP53    | -1.81 | 8.15E-04 | 8.85    | 10.24   | 9.46    | 5.33    | 5.65    | 4.76    |
| 654342 | LOC654342    | -1.67 | 1.29E-03 | 455.32  | 393.66  | 465.67  | 255.25  | 280.89  | 250.14  |
| 654433 | LOC654433    | -1.81 | 1.88E-03 | 147.31  | 138.55  | 124.81  | 74.04   | 84.88   | 67.63   |
| 677837 | SNORA60      | -1.55 | 2.38E-03 | 45.41   | 52.75   | 47.98   | 34.03   | 28.95   | 31.34   |
| 727936 | GXYLT2       | -1.52 | 2.59E-04 | 183.57  | 171.38  | 175.98  | 122.51  | 115.51  | 111.31  |
| 728392 | LOC728392    | -3.33 | 1.34E-03 | 373.16  | 239.45  | 358.23  | 88.49   | 100.36  | 102.57  |
| 767582 | SNORD114-6   | -3.57 | 1.80E-03 | 12.25   | 12.06   | 18.52   | 3.30    | 4.11    | 4.60    |
| 1E+08  | TSTD1        | 2.71  | 8.50E-04 | 30.94   | 42.97   | 30.61   | 92.48   | 93.51   | 96.76   |
| 1E+08  | LOC100132288 | 2.61  | 3.96E-05 | 58.54   | 52.29   | 61.45   | 151.35  | 146.72  | 151.42  |
| 1E+08  | LOC100133106 | -1.85 | 4.06E-03 | 12.47   | 17.50   | 14.92   | 8.54    | 8.01    | 7.77    |
| 1E+08  | CD24         | 30.08 | 2.58E-03 | 28.59   | 4.96    | 21.25   | 590.29  | 551.33  | 506.88  |
| 25     | ABL1         | -1.14 | 4.14E-02 | 493.67  | 427.63  | 479.74  | 408.72  | 407.97  | 410.92  |
| 92     | ACVR2A       | -1.23 | 3.00E-03 | 34.33   | 33.10   | 33.79   | 26.20   | 27.36   | 29.05   |
| 473    | RERE         | -1.18 | 1.94E-02 | 262.23  | 244.40  | 277.84  | 216.21  | 219.41  | 231.58  |
| 613    | BCR          | -1.12 | 4.97E-02 | 190.89  | 179.06  | 199.29  | 159.66  | 171.13  | 175.52  |
| 767    | CA8          | -1.07 | 3.77E-02 | 3.59    | 3.46    | 3.38    | 3.30    | 3.18    | 3.29    |
| 919    | CD247        | -1.09 | 2.17E-01 | 9.91    | 8.56    | 8.61    | 8.55    | 8.51    | 7.86    |
| 923    | CD6          | -1.04 | 1.23E-01 | 17.49   | 17.07   | 17.17   | 17.06   | 16.75   | 16.14   |
| 953    | ENTPD1       | -2.85 | 2.93E-02 | 24.89   | 57.41   | 24.24   | 13.91   | 11.07   | 12.43   |
| 1107   | CHD3         | -1.20 | 1.89E-02 | 166.71  | 144.71  | 165.28  | 131.68  | 128.55  | 135.60  |
| 1352   | COX10        | -1.11 | 4.75E-03 | 115.38  | 110.74  | 113.55  | 103.88  | 103.02  | 99.30   |
| 1439   | CSF2RB       | -1.21 | 2.41E-02 | 20.04   | 17.40   | 17.50   | 14.64   | 15.92   | 15.01   |
| 1871   | E2F3         | -1.11 | 1.72E-01 | 37.15   | 44.90   | 39.10   | 37.13   | 35.35   | 37.06   |
| 2297   | FOXD1        | -1.13 | 3.07E-02 | 150.03  | 160.66  | 170.07  | 142.02  | 141.37  | 142.85  |
| 2348   | FOLR1        | -1.32 | 2.91E-02 | 21.33   | 18.87   | 20.91   | 17.06   | 13.28   | 16.01   |
| 2803   | GOLGA4       | -1.12 | 5.15E-02 | 257.58  | 225.61  | 251.50  | 218.22  | 213.94  | 221.47  |
| 3064   | HTT          | -1.16 | 2.67E-02 | 139.76  | 134.98  | 145.56  | 118.06  | 114.19  | 129.69  |
| 3075   | CFH          | 1.52  | 2.33E-02 | 287.97  | 197.26  | 277.14  | 393.30  | 380.52  | 383.68  |
| 3223   | HOXC6        | -1.37 | 3.94E-02 | 58.23   | 51.51   | 60.26   | 49.61   | 37.30   | 37.17   |
| 3460   | IFNGR2       | -1.13 | 3.88E-03 | 223.34  | 217.19  | 225.44  | 190.62  | 197.66  | 201.88  |
| 3651   | PDX1         | -1.09 | 1.43E-01 | 24.02   | 21.12   | 20.86   | 20.63   | 19.36   | 20.29   |
| 3675   | ITGA3        | 1.87  | 2.31E-02 | 405.49  | 241.40  | 427.01  | 679.22  | 648.21  | 676.16  |
| 3920   | LAMP2        | -1.08 | 2.01E-02 | 625.38  | 602.82  | 600.75  | 579.50  | 562.50  | 546.02  |
| 4035   | LRP1         | -1.48 | 4.12E-02 | 1285.04 | 953.33  | 1345.54 | 804.33  | 703.46  | 908.54  |
| 4054   | LTBP3        | -1.35 | 4.99E-03 | 232.61  | 214.85  | 257.29  | 171.53  | 173.83  | 177.07  |
| 4088   | SMAD3        | -1.17 | 2.70E-03 | 464.80  | 466.06  | 485.20  | 390.60  | 417.54  | 401.49  |
| 4240   | MFGE8        | -1.34 | 2.16E-02 | 2097.67 | 1621.71 | 1983.73 | 1399.92 | 1449.85 | 1394.47 |
| 4609   | MYC          | -1.44 | 2.51E-02 | 165.49  | 230.93  | 181.86  | 127.72  | 139.58  | 133.41  |

|       |          |       |          |         |         |         |         |         |         |
|-------|----------|-------|----------|---------|---------|---------|---------|---------|---------|
| 4803  | NGF      | -1.06 | 1.70E-01 | 35.17   | 32.09   | 31.50   | 31.38   | 30.06   | 31.34   |
| 4837  | NNMT     | -1.21 | 3.23E-04 | 745.27  | 739.43  | 736.06  | 598.39  | 612.08  | 631.89  |
| 4908  | NTF3     | -1.21 | 1.60E-01 | 27.99   | 36.01   | 28.08   | 21.97   | 27.77   | 26.32   |
| 6041  | RNASEL   | -1.28 | 1.98E-02 | 23.91   | 24.09   | 27.42   | 18.44   | 19.05   | 21.56   |
| 6514  | SLC2A2   | -1.06 | 2.32E-01 | 3.27    | 3.65    | 3.23    | 3.21    | 3.17    | 3.22    |
| 6830  | SUPT6H   | -1.07 | 4.10E-02 | 518.99  | 510.73  | 515.91  | 473.61  | 473.43  | 504.07  |
| 6909  | TBX2     | -1.38 | 5.79E-03 | 157.81  | 191.66  | 165.16  | 126.47  | 122.80  | 123.53  |
| 7102  | TSPAN7   | -1.09 | 1.87E-01 | 5.43    | 6.41    | 5.54    | 5.34    | 5.15    | 5.42    |
| 7150  | TOP1     | -1.13 | 3.97E-02 | 685.84  | 600.19  | 653.64  | 573.14  | 570.96  | 577.57  |
| 7249  | TSC2     | -1.19 | 5.84E-03 | 239.69  | 266.00  | 247.10  | 213.71  | 211.68  | 206.96  |
| 7430  | EZR      | 1.78  | 1.79E-02 | 321.29  | 197.99  | 307.92  | 500.58  | 490.94  | 484.45  |
| 7574  | ZNF26    | -1.10 | 1.84E-02 | 27.27   | 28.50   | 27.75   | 26.04   | 25.71   | 24.35   |
| 7837  | PXDN     | -1.23 | 3.25E-04 | 931.17  | 931.46  | 916.10  | 758.74  | 730.29  | 773.80  |
| 8237  | USP11    | -1.10 | 4.06E-02 | 286.29  | 276.61  | 308.81  | 263.45  | 262.94  | 263.83  |
| 8450  | CUL4B    | -1.33 | 4.22E-02 | 252.43  | 187.99  | 243.70  | 173.38  | 170.47  | 171.95  |
| 8521  | GCM1     | -1.05 | 4.90E-02 | 4.13    | 4.22    | 4.19    | 3.88    | 4.03    | 4.08    |
| 8707  | B3GALT2  | -2.20 | 4.34E-02 | 12.35   | 26.69   | 15.35   | 7.50    | 7.08    | 10.18   |
| 8729  | GBF1     | -1.19 | 2.88E-02 | 451.23  | 399.25  | 451.57  | 354.84  | 352.90  | 388.34  |
| 8871  | SYNJ2    | -1.44 | 2.09E-03 | 162.78  | 147.32  | 171.90  | 111.64  | 106.93  | 116.23  |
| 8908  | GYG2     | -1.31 | 4.80E-02 | 31.76   | 42.62   | 33.54   | 28.02   | 26.51   | 28.03   |
| 9074  | CLDN6    | -1.17 | 5.32E-02 | 3.96    | 4.04    | 4.67    | 3.72    | 3.68    | 3.47    |
| 9635  | CLCA2    | -4.65 | 1.81E-02 | 98.26   | 30.88   | 86.04   | 16.62   | 15.40   | 14.23   |
| 9871  | SEC24D   | -1.20 | 1.80E-02 | 729.35  | 803.74  | 701.74  | 615.92  | 648.10  | 595.94  |
| 10014 | HDAC5    | -1.14 | 4.52E-02 | 199.87  | 220.76  | 218.45  | 175.95  | 194.27  | 192.13  |
| 10577 | NPC2     | -1.18 | 4.16E-02 | 1210.12 | 1375.61 | 1154.97 | 1072.53 | 1077.34 | 1011.54 |
| 22808 | MRAS     | -1.28 | 4.55E-02 | 240.76  | 183.79  | 230.73  | 168.51  | 174.03  | 168.13  |
| 22954 | TRIM32   | -1.15 | 3.68E-02 | 164.22  | 184.53  | 166.87  | 145.89  | 157.36  | 146.99  |
| 23041 | MON2     | -1.27 | 2.22E-02 | 163.53  | 194.68  | 170.62  | 134.67  | 132.42  | 149.80  |
| 23160 | WDR43    | -1.22 | 2.50E-03 | 281.85  | 257.03  | 278.85  | 225.36  | 221.71  | 221.84  |
| 23345 | SYNE1    | -1.27 | 2.67E-02 | 47.49   | 45.99   | 52.20   | 38.26   | 34.51   | 42.24   |
| 23352 | UBR4     | -1.29 | 2.83E-02 | 423.73  | 431.14  | 454.94  | 336.10  | 294.74  | 382.18  |
| 23389 | MED13L   | -1.17 | 4.49E-02 | 287.92  | 335.44  | 291.66  | 252.79  | 258.10  | 271.87  |
| 23411 | SIRT1    | -1.05 | 2.72E-03 | 144.32  | 140.91  | 143.39  | 136.57  | 135.91  | 135.75  |
| 23429 | RYBP     | -1.31 | 1.79E-03 | 142.20  | 154.63  | 146.68  | 108.41  | 118.74  | 110.54  |
| 23654 | PLXNB2   | -1.20 | 2.48E-03 | 638.65  | 678.38  | 629.14  | 528.73  | 551.42  | 546.95  |
| 23741 | EID1     | -1.14 | 2.31E-02 | 468.29  | 485.33  | 515.35  | 445.72  | 408.89  | 429.48  |
| 26092 | TOR1AIP1 | -1.18 | 2.90E-02 | 701.36  | 765.43  | 660.84  | 630.64  | 589.27  | 579.95  |
| 26813 | SNORD36C | -1.30 | 1.67E-02 | 101.63  | 97.81   | 101.36  | 74.15   | 87.49   | 70.40   |
| 27063 | ANKRD1   | -1.80 | 4.41E-02 | 28.19   | 16.51   | 29.99   | 14.63   | 13.19   | 13.63   |
| 27079 | RPUSD2   | -1.08 | 1.44E-01 | 43.99   | 44.78   | 49.21   | 40.82   | 43.14   | 43.97   |
| 29035 | C16orf72 | -1.17 | 4.94E-02 | 240.56  | 282.42  | 244.01  | 212.87  | 225.88  | 219.37  |

|        |           |       |          |        |        |        |        |        |        |
|--------|-----------|-------|----------|--------|--------|--------|--------|--------|--------|
| 51310  | SLC22A17  | -1.45 | 1.24E-01 | 156.45 | 262.72 | 154.51 | 126.79 | 132.84 | 135.44 |
| 51566  | ARMCX3    | -1.28 | 3.37E-02 | 121.47 | 101.93 | 125.49 | 94.97  | 83.91  | 94.41  |
| 53373  | TPCN1     | -1.36 | 2.97E-03 | 172.68 | 200.51 | 180.61 | 132.79 | 135.32 | 140.13 |
| 54850  | FBXL12    | -1.06 | 5.14E-02 | 114.25 | 118.69 | 113.72 | 111.68 | 110.14 | 106.28 |
| 55285  | RBM41     | -1.12 | 5.12E-03 | 27.74  | 28.99  | 28.04  | 24.84  | 24.76  | 26.00  |
| 55356  | SLC22A15  | -1.38 | 1.23E-01 | 23.57  | 38.31  | 25.36  | 20.53  | 21.20  | 21.62  |
| 55701  | ARHGEF40  | -1.21 | 3.87E-02 | 80.55  | 96.71  | 87.76  | 75.98  | 68.88  | 74.94  |
| 55761  | TTC17     | -1.29 | 2.18E-01 | 170.17 | 271.17 | 169.24 | 161.71 | 154.88 | 157.03 |
| 55779  | WDR52     | -1.13 | 5.62E-02 | 7.40   | 6.83   | 6.57   | 5.99   | 6.49   | 5.87   |
| 56160  | NDNL2     | -1.07 | 2.56E-02 | 90.89  | 95.18  | 89.77  | 87.37  | 84.77  | 84.47  |
| 56776  | FMN2      | -1.44 | 2.84E-02 | 205.81 | 149.90 | 201.75 | 127.63 | 135.28 | 124.85 |
| 57181  | SLC39A10  | -1.47 | 2.55E-04 | 301.46 | 328.78 | 327.54 | 214.97 | 222.63 | 212.46 |
| 57393  | TMEM27    | -1.27 | 5.59E-02 | 7.49   | 6.15   | 7.97   | 5.41   | 6.12   | 5.54   |
| 57573  | ZNF471    | -1.17 | 1.42E-01 | 19.48  | 18.87  | 19.49  | 18.61  | 17.11  | 13.83  |
| 57633  | LRRN1     | 1.97  | 4.35E-02 | 31.23  | 15.36  | 34.14  | 52.57  | 54.08  | 52.54  |
| 58476  | TP53INP2  | -1.15 | 1.82E-03 | 178.03 | 182.86 | 184.13 | 158.09 | 152.56 | 161.50 |
| 79174  | CRELD2    | -1.08 | 1.20E-01 | 79.64  | 85.73  | 75.00  | 72.92  | 74.84  | 74.30  |
| 80781  | COL18A1   | -1.10 | 4.56E-02 | 61.93  | 59.21  | 56.53  | 52.40  | 52.82  | 56.02  |
| 81539  | SLC38A1   | -1.38 | 1.43E-04 | 839.17 | 864.08 | 817.70 | 611.60 | 588.53 | 622.03 |
| 81622  | UNC93B1   | -1.31 | 3.35E-02 | 100.11 | 125.54 | 102.94 | 91.08  | 80.54  | 80.11  |
| 84074  | QRICH2    | -1.30 | 4.02E-02 | 26.25  | 29.72  | 23.82  | 22.95  | 19.07  | 19.40  |
| 84078  | KBTBD7    | -1.37 | 5.51E-03 | 55.40  | 63.93  | 56.84  | 46.03  | 40.71  | 41.72  |
| 84129  | ACAD11    | -1.15 | 5.40E-02 | 82.59  | 93.63  | 97.65  | 77.83  | 81.07  | 78.67  |
| 84181  | CHD6      | -1.19 | 2.61E-02 | 97.99  | 109.45 | 98.38  | 84.70  | 81.67  | 91.53  |
| 85365  | ALG2      | -1.18 | 2.22E-01 | 139.66 | 192.03 | 137.94 | 133.13 | 130.98 | 132.63 |
| 113235 | SLC46A1   | -1.10 | 1.27E-01 | 65.46  | 64.98  | 65.35  | 54.64  | 64.64  | 59.49  |
| 128025 | WDR64     | -1.08 | 4.64E-02 | 2.85   | 2.77   | 2.68   | 2.66   | 2.54   | 2.49   |
| 128312 | HIST3H2BB | 1.70  | 1.88E-02 | 32.77  | 24.60  | 23.61  | 52.69  | 46.87  | 38.17  |
| 133308 | NHEDC2    | -1.24 | 4.31E-02 | 305.24 | 245.99 | 304.21 | 228.13 | 230.43 | 232.01 |
| 135656 | DPCR1     | -1.01 | 4.17E-02 | 10.70  | 10.63  | 10.69  | 10.63  | 10.57  | 10.57  |
| 136242 | PRSS37    | -1.12 | 1.18E-01 | 4.37   | 4.33   | 5.01   | 3.97   | 3.98   | 4.31   |
| 145389 | SLC38A6   | -1.31 | 1.58E-01 | 202.34 | 301.95 | 191.78 | 184.51 | 175.62 | 169.86 |
| 147837 | ZNF563    | -1.08 | 2.29E-01 | 13.64  | 13.97  | 13.55  | 13.43  | 13.37  | 11.40  |
| 151651 | EFHB      | -1.51 | 1.98E-02 | 8.48   | 5.97   | 7.69   | 4.83   | 4.70   | 5.10   |
| 151790 | WDR49     | -1.05 | 2.19E-01 | 4.04   | 4.02   | 4.46   | 3.97   | 3.95   | 3.99   |
| 153443 | SRFBP1    | -1.23 | 4.13E-02 | 136.18 | 162.28 | 136.35 | 126.18 | 111.78 | 116.37 |
| 162394 | SLFN5     | -1.19 | 1.29E-04 | 843.61 | 865.88 | 834.91 | 718.36 | 707.26 | 706.07 |
| 202374 | STK32A    | -1.34 | 2.04E-02 | 11.59  | 9.07   | 11.13  | 8.08   | 7.79   | 7.89   |
| 245812 | CNPY4     | -1.19 | 1.62E-01 | 47.39  | 62.15  | 47.03  | 45.83  | 41.05  | 44.60  |
| 266727 | MDGA1     | -1.47 | 4.13E-02 | 92.13  | 63.95  | 93.33  | 55.38  | 58.57  | 55.62  |
| 284307 | ZIK1      | -1.18 | 4.36E-02 | 42.41  | 49.05  | 41.15  | 36.71  | 38.29  | 37.48  |

|        |           |       |          |        |        |        |        |        |        |
|--------|-----------|-------|----------|--------|--------|--------|--------|--------|--------|
| 285761 | DCBLD1    | -1.22 | 2.65E-02 | 116.96 | 132.37 | 128.28 | 95.08  | 109.98 | 105.54 |
| 286148 | DPY19L4   | -1.15 | 2.04E-03 | 188.81 | 179.14 | 178.11 | 159.71 | 158.28 | 156.01 |
| 337880 | KRTAP11-1 | -1.06 | 2.44E-01 | 9.94   | 9.76   | 9.82   | 9.76   | 8.58   | 9.62   |
| 339669 | C22orf33  | -1.11 | 1.76E-01 | 6.75   | 5.64   | 5.67   | 5.64   | 5.39   | 5.20   |
| 345895 | RSPH4A    | -1.13 | 1.89E-02 | 4.87   | 4.42   | 4.61   | 3.99   | 4.21   | 4.09   |
| 348487 | FAM131C   | -1.13 | 3.77E-03 | 58.16  | 60.04  | 58.77  | 52.82  | 50.72  | 53.74  |
| 360030 | NANOGNB   | -1.06 | 2.14E-01 | 2.87   | 2.84   | 3.17   | 2.83   | 2.82   | 2.74   |
| 375061 | FAM89A    | -1.23 | 3.80E-04 | 66.75  | 66.62  | 68.57  | 55.50  | 52.97  | 55.73  |
| 400713 | ZNF880    | -1.41 | 1.17E-05 | 131.70 | 136.54 | 132.10 | 93.81  | 95.57  | 94.07  |
| 407024 | MIR29B1   | -1.05 | 4.47E-02 | 1.95   | 2.02   | 2.05   | 1.92   | 1.91   | 1.93   |
| 440026 | TMEM41B   | -1.12 | 2.66E-03 | 114.59 | 117.62 | 111.20 | 101.83 | 103.22 | 102.23 |
| 492311 | C5orf53   | -1.22 | 4.52E-02 | 26.14  | 20.89  | 23.65  | 18.54  | 19.13  | 20.09  |



**Supplementary Table 2. The 227 genes that expressed differently in HPAH and IPAH HPASMC compared with Normal cells.** The table showed the entrez gene ID, gene symbol, the fold change of mRNA expression in HPAH and IPAH samples compared with normal HPASMC, and the normalized expression value of control, HPAH and IPAH samples.

| Symbol            | Entrez Gene Name                                                     | Entrez Gene ID | Fold Change (HPAH) | p-value (HPAH) | Fold Change (IPAH) | p-value (IPAH) |
|-------------------|----------------------------------------------------------------------|----------------|--------------------|----------------|--------------------|----------------|
| A2M               | alpha-2-macroglobulin                                                | 2              | -2.014             | 1.10E-03       | -1.809             | 1.44E-03       |
| ABCA6             | ATP-binding cassette, sub-family A (ABC1), member 6                  | 23460          | -2.087             | 9.09E-03       | -2.812             | 2.66E-03       |
| ABCA9             | ATP-binding cassette, sub-family A (ABC1), member 9                  | 10350          | -1.528             | 1.98E-04       | -2.045             | 2.87E-04       |
| ADAMTS5           | ADAM metalloproteinase with thrombospondin type 1 motif, 5           | 11096          | -1.683             | 3.55E-04       | -2.554             | 1.02E-04       |
| ADRB2             | adrenoceptor beta 2, surface                                         | 154            | 2.089              | 2.18E-04       | 2.191              | 1.48E-04       |
| AHR               | aryl hydrocarbon receptor                                            | 196            | -1.592             | 2.01E-04       | -1.835             | 7.09E-05       |
| ANLN              | anillin, actin binding protein                                       | 54443          | 2.356              | 8.74E-03       | 5.827              | 6.49E-04       |
| ANO4              | anoctamin 4                                                          | 121601         | -1.961             | 8.81E-04       | -2.168             | 4.73E-04       |
| ANXA3             | annexin A3                                                           | 306            | 2.044              | 2.31E-04       | 4.137              | 7.40E-05       |
| APOBEC3G          | apolipoprotein B mRNA editing enzyme, catalytic polypeptide-like 3G  | 60489          | -1.333             | 3.82E-03       | -1.690             | 2.02E-04       |
| ASF1B             | anti-silencing function 1B histone chaperone                         | 55723          | 1.576              | 3.70E-03       | 2.973              | 4.00E-05       |
| ASPM              | asp (abnormal spindle) homolog, microcephaly associated (Drosophila) | 259266         | 2.308              | 9.73E-03       | 5.434              | 7.92E-04       |
| ATP2B1            | ATPase, Ca <sup>++</sup> transporting, plasma membrane 1             | 490            | -1.860             | 4.03E-04       | -1.651             | 3.89E-04       |
| ATP6V1G2          | ATPase, H <sup>+</sup> transporting, lysosomal 13kDa, V1 subunit G2  | 534            | -2.346             | 2.20E-04       | -1.796             | 6.28E-04       |
| BDKRB2            | bradykinin receptor B2                                               | 624            | -1.607             | 9.36E-03       | -1.871             | 5.29E-03       |
| BDNF              | brain-derived neurotrophic factor                                    | 627            | -2.078             | 1.29E-03       | -2.561             | 2.20E-04       |
| BEX1              | brain expressed, X-linked 1                                          | 55859          | -3.925             | 5.96E-05       | -2.982             | 1.03E-04       |
| BMP4              | bone morphogenetic protein 4                                         | 652            | 2.405              | 3.17E-05       | 3.323              | 1.20E-05       |
| BUB1B             | BUB1 mitotic checkpoint serine/threonine kinase B                    | 701            | 2.013              | 3.45E-04       | 4.950              | 1.29E-05       |
| C1QTNF1           | C1q and tumor necrosis factor related protein 1                      | 114897         | -1.351             | 3.68E-04       | -1.656             | 5.13E-05       |
| C1QTNF3           | C1q and tumor necrosis factor related protein 3                      | 114899         | 2.935              | 1.97E-05       | 1.506              | 9.11E-04       |
| C2orf27A/C2orf27B | chromosome 2 open reading frame 27A                                  | 29798          | -2.322             | 5.63E-04       | -1.547             | 1.57E-03       |
| CADM1             | cell adhesion molecule 1                                             | 23705          | 1.841              | 6.46E-04       | 1.903              | 8.00E-04       |
| CCDC146           | coiled-coil domain containing 146                                    | 57639          | -1.266             | 4.77E-02       | -1.545             | 2.28E-03       |
| CCDC68            | coiled-coil domain containing 68                                     | 80323          | -4.003             | 4.26E-04       | -2.716             | 3.03E-04       |
| CCL20             | chemokine (C-C motif) ligand 20                                      | 6364           | -2.526             | 9.66E-04       | -2.356             | 1.16E-03       |
| CCL28             | chemokine (C-C motif) ligand 28                                      | 56477          | 1.633              | 4.05E-04       | 2.575              | 3.06E-05       |

|            |                                                                      |        |        |          |        |          |
|------------|----------------------------------------------------------------------|--------|--------|----------|--------|----------|
| CCNB2      | cyclin B2                                                            | 9133   | 1.986  | 9.20E-03 | 5.419  | 4.72E-04 |
| CCNE2      | cyclin E2                                                            | 9134   | 1.681  | 4.13E-03 | 2.066  | 6.67E-04 |
| CD180      | CD180 molecule                                                       | 4064   | 10.042 | 1.53E-05 | 35.065 | 2.77E-06 |
| CD4        | CD4 molecule                                                         | 920    | -3.185 | 7.77E-05 | -2.003 | 2.27E-04 |
| CDC20      | cell division cycle 20                                               | 991    | 2.717  | 4.02E-03 | 7.059  | 3.05E-04 |
| CDCP1      | CUB domain containing protein 1                                      | 64866  | 1.666  | 1.69E-03 | 2.342  | 2.56E-04 |
| CDK1       | cyclin-dependent kinase 1                                            | 983    | 1.981  | 3.75E-03 | 4.634  | 1.86E-04 |
| CDKN3      | cyclin-dependent kinase inhibitor 3                                  | 1033   | 2.134  | 2.51E-02 | 5.987  | 1.50E-03 |
| CECR1      | cat eye syndrome chromosome region, candidate 1                      | 51816  | 2.017  | 3.20E-03 | 2.252  | 3.17E-03 |
| CENPE      | centromere protein E, 312kDa                                         | 1062   | 2.005  | 1.30E-03 | 3.865  | 1.23E-04 |
| CENPQ      | centromere protein Q                                                 | 55166  | 1.946  | 3.05E-03 | 2.211  | 2.15E-03 |
| CERS4      | ceramide synthase 4                                                  | 79603  | 1.566  | 2.28E-04 | 1.987  | 1.25E-04 |
| CGNL1      | cingulin-like 1                                                      | 84952  | 2.631  | 4.02E-04 | 2.418  | 2.08E-04 |
| CKAP2L     | cytoskeleton associated protein 2-like                               | 150468 | 2.004  | 5.87E-03 | 4.400  | 3.98E-04 |
| CMAHP      | cytidine monophospho-N-acetylneuraminic acid hydroxylase, pseudogene | 8418   | 1.743  | 1.29E-03 | 3.538  | 9.43E-05 |
| CPA4       | carboxypeptidase A4                                                  | 51200  | 2.566  | 5.88E-03 | 2.399  | 7.65E-03 |
| CPED1      | cadherin-like and PC-esterase domain containing 1                    | 79974  | -2.148 | 6.58E-04 | -1.511 | 5.85E-03 |
| CSGALNACT1 | chondroitin sulfate N-acetylgalactosaminyltransferase 1              | 55790  | -1.673 | 2.67E-04 | -2.149 | 2.73E-04 |
| CST1       | cystatin SN                                                          | 1469   | -4.771 | 2.44E-04 | -7.229 | 1.12E-04 |
| CTSH       | cathepsin H                                                          | 1512   | 3.570  | 1.48E-04 | 2.252  | 7.90E-04 |
| CXCL10     | chemokine (C-X-C motif) ligand 10                                    | 3627   | -2.279 | 6.46E-05 | -2.067 | 3.17E-04 |
| CXCL12     | chemokine (C-X-C motif) ligand 12                                    | 6387   | -1.651 | 5.42E-03 | -2.238 | 9.22E-04 |
| DAPK1      | death-associated protein kinase 1                                    | 1612   | 3.125  | 1.55E-04 | 1.532  | 2.49E-03 |
| DIRC1      | disrupted in renal carcinoma 1                                       | 116093 | -2.181 | 3.33E-03 | -2.015 | 2.46E-03 |
| DNAH5      | dynein, axonemal, heavy chain 5                                      | 1767   | -1.455 | 2.99E-02 | -1.935 | 4.85E-03 |
| DNAJC6     | DnaJ (Hsp40) homolog, subfamily C, member 6                          | 9829   | -1.583 | 6.09E-03 | -1.770 | 3.77E-03 |
| DNER       | delta/notch-like EGF repeat containing                               | 92737  | -2.764 | 3.24E-05 | -1.578 | 3.20E-04 |
| DOCK4      | dedicator of cytokinesis 4                                           | 9732   | -1.720 | 6.22E-04 | -1.767 | 3.65E-04 |
| DSEL       | dermatan sulfate epimerase-like                                      | 92126  | -1.709 | 3.39E-04 | -1.501 | 8.96E-04 |
| DSG2       | desmoglein 2                                                         | 1829   | -5.663 | 3.97E-06 | -6.511 | 7.42E-06 |
| DTL        | denticleless E3 ubiquitin protein ligase homolog (Drosophila)        | 51514  | 1.586  | 5.52E-03 | 2.365  | 2.35E-04 |
| E2F7       | E2F transcription factor 7                                           | 144455 | 1.505  | 2.10E-03 | 1.583  | 5.89E-04 |
| EDNRB      | endothelin receptor type B                                           | 1910   | -7.616 | 4.90E-04 | -2.321 | 6.53E-03 |
| EFHB       | EF-hand domain family, member B                                      | 151651 | -1.740 | 9.69E-03 | -1.513 | 1.98E-02 |
| ENC1       | ectodermal-neural cortex 1 (with BTB domain)                         | 8507   | -2.227 | 2.14E-04 | -2.167 | 3.98E-05 |
| EPHB1      | EPH receptor B1                                                      | 2047   | 1.689  | 2.95E-05 | 1.748  | 6.92E-05 |
| EREG       | epiregulin                                                           | 2069   | -6.881 | 6.81E-04 | -6.292 | 4.23E-04 |
| ERG        | v-ets avian erythroblastosis virus E26 oncogene homolog              | 2078   | 8.529  | 3.40E-03 | 6.278  | 5.79E-03 |
| ESCO2      | establishment of sister chromatid cohesion N-acetyltransferase 2     | 157570 | 2.176  | 3.35E-03 | 3.414  | 5.81E-04 |
| EVI2A      | ecotropic viral integration site 2A                                  | 2123   | 2.992  | 1.44E-04 | 4.062  | 1.03E-04 |

|                              |                                                          |        |        |          |        |          |
|------------------------------|----------------------------------------------------------|--------|--------|----------|--------|----------|
| FABP4                        | fatty acid binding protein 4, adipocyte                  | 2167   | -4.565 | 7.90E-03 | -5.134 | 5.25E-03 |
| FAM111B                      | family with sequence similarity 111, member B            | 374393 | 2.357  | 2.25E-04 | 3.373  | 3.69E-05 |
| FAM129A                      | family with sequence similarity 129, member A            | 116496 | 1.500  | 3.46E-04 | 1.889  | 3.29E-05 |
| FAM20A                       | family with sequence similarity 20, member A             | 54757  | -2.786 | 1.09E-03 | -3.529 | 5.12E-04 |
| FANCI                        | Fanconi anemia, complementation group I                  | 55215  | 1.522  | 3.42E-04 | 2.489  | 2.69E-05 |
| FLRT2                        | fibronectin leucine rich transmembrane protein 2         | 23768  | -2.573 | 6.22E-05 | -1.820 | 2.28E-04 |
| FOXE1                        | forkhead box E1 (thyroid transcription factor 2)         | 2304   | -2.693 | 2.54E-03 | -2.788 | 2.76E-03 |
| FRMD4B                       | FERM domain containing 4B                                | 23150  | 2.845  | 2.77E-03 | 2.902  | 2.47E-03 |
| GDF15                        | growth differentiation factor 15                         | 9518   | -1.981 | 3.31E-04 | -1.933 | 5.68E-04 |
| GINS1                        | GINS complex subunit 1 (Psf1 homolog)                    | 9837   | 1.585  | 4.14E-03 | 2.185  | 4.80E-04 |
| GRIK2                        | glutamate receptor, ionotropic, kainate 2                | 2898   | -1.872 | 1.28E-03 | -3.612 | 1.21E-04 |
| HDHD1                        | haloacid dehalogenase-like hydrolase domain containing 1 | 8226   | -1.817 | 1.55E-04 | -1.610 | 1.31E-04 |
| HIST1H2A G (includes others) | histone cluster 1, H2ag                                  | 8332   | 1.709  | 4.51E-04 | 2.798  | 8.17E-05 |
| HIST1H2A G (includes others) | histone cluster 1, H2ag                                  | 8969   | 1.840  | 2.68E-03 | 3.164  | 1.83E-04 |
| HIST1H2B B                   | histone cluster 1, H2bb                                  | 3018   | 1.515  | 5.05E-03 | 3.567  | 1.03E-04 |
| HIST1H2B H/HIST1H2BO         | histone cluster 1, H2bo                                  | 8345   | 1.868  | 5.79E-04 | 2.999  | 1.98E-05 |
| HIST1H3A (includes others)   | histone cluster 1, H3a                                   | 8354   | 1.667  | 1.88E-04 | 2.563  | 8.83E-06 |
| HIST1H3A (includes others)   | histone cluster 1, H3a                                   | 8357   | 1.773  | 2.53E-03 | 4.023  | 8.59E-05 |
| HIST1H4A (includes others)   | histone cluster 1, H4a                                   | 8359   | 1.530  | 5.61E-03 | 2.156  | 1.55E-03 |
| HIST1H4A (includes others)   | histone cluster 1, H4a                                   | 8364   | 1.815  | 8.69E-04 | 2.878  | 1.40E-04 |
| HIST2H2A B                   | histone cluster 2, H2ab                                  | 317772 | 1.626  | 7.19E-04 | 2.808  | 2.95E-05 |
| HIST2H2B E (includes others) | histone cluster 2, H2be                                  | 8344   | 1.508  | 1.62E-03 | 2.372  | 7.45E-05 |
| HJURP                        | Holliday junction recognition protein                    | 55355  | 1.534  | 5.00E-03 | 4.005  | 7.13E-05 |
| HLA-DPA1                     | major histocompatibility complex, class II, DP alpha 1   | 3113   | -6.723 | 5.71E-05 | -2.133 | 1.01E-04 |

|            |                                                                                    |        |        |          |        |          |
|------------|------------------------------------------------------------------------------------|--------|--------|----------|--------|----------|
| HMMR       | hyaluronan-mediated motility receptor (RHAMM)                                      | 3161   | 2.538  | 3.22E-03 | 6.795  | 2.25E-04 |
| HOMER2     | homer homolog 2 (Drosophila)                                                       | 9455   | 1.550  | 7.13E-04 | 1.836  | 4.28E-04 |
| HTATSF1 P2 | HIV-1 Tat specific factor 1 pseudogene 2                                           | 401233 | -1.909 | 4.85E-03 | -3.174 | 4.47E-04 |
| ICAM2      | intercellular adhesion molecule 2                                                  | 3384   | 1.997  | 5.15E-05 | 2.116  | 1.24E-05 |
| IL1R1      | interleukin 1 receptor, type I                                                     | 3554   | -1.505 | 3.48E-04 | -2.102 | 2.75E-06 |
| IL4R       | interleukin 4 receptor                                                             | 3566   | -1.723 | 1.85E-03 | -1.846 | 6.41E-04 |
| INMT       | indolethylamine N-methyltransferase                                                | 11185  | -1.703 | 6.52E-04 | -3.094 | 1.13E-04 |
| IQGAP3     | IQ motif containing GTPase activating protein 3                                    | 128239 | 2.092  | 2.24E-03 | 4.860  | 1.30E-04 |
| ISLR       | immunoglobulin superfamily containing leucine-rich repeat                          | 3671   | 2.573  | 5.16E-06 | 2.119  | 4.52E-05 |
| KCNK1      | potassium channel, subfamily K, member 1                                           | 3775   | 1.555  | 8.82E-04 | 1.662  | 2.49E-04 |
| KCNMA1     | potassium large conductance calcium-activated channel, subfamily M, alpha member 1 | 3778   | 2.076  | 4.58E-04 | 1.831  | 8.60E-04 |
| KDM5C      | lysine (K)-specific demethylase 5C                                                 | 8242   | -1.477 | 2.28E-03 | -1.769 | 6.94E-04 |
| KIF11      | kinesin family member 11                                                           | 3832   | 2.019  | 5.95E-03 | 4.051  | 5.74E-04 |
| KIF15      | kinesin family member 15                                                           | 56992  | 1.560  | 1.00E-02 | 3.215  | 1.26E-04 |
| KIF20B     | kinesin family member 20B                                                          | 9585   | 1.849  | 5.39E-03 | 4.044  | 2.87E-04 |
| KIF23      | kinesin family member 23                                                           | 9493   | 1.576  | 4.07E-04 | 2.318  | 3.79E-05 |
| KLHL4      | kelch-like family member 4                                                         | 56062  | 2.052  | 2.05E-04 | 2.163  | 2.41E-05 |
| KLHL41     | kelch-like family member 41                                                        | 10324  | 2.174  | 7.67E-03 | 2.629  | 2.16E-03 |
| KNSTRN     | kinetochore-localized astrin/SPAG5 binding protein                                 | 90417  | 1.511  | 9.43E-03 | 2.061  | 1.37E-03 |
| KRT19      | keratin 19                                                                         | 3880   | 2.650  | 9.07E-03 | 3.117  | 5.43E-03 |
| KRT23      | keratin 23 (histone deacetylase inducible)                                         | 25984  | 1.650  | 1.55E-03 | 1.534  | 1.24E-03 |
| KSR1       | kinase suppressor of ras 1                                                         | 8844   | -1.594 | 6.41E-04 | -2.452 | 1.23E-04 |
| L1CAM      | L1 cell adhesion molecule                                                          | 3897   | -1.564 | 7.30E-05 | -1.527 | 4.18E-04 |
| LCE2A      | late cornified envelope 2A                                                         | 353139 | 3.940  | 7.08E-04 | 3.171  | 6.75E-04 |
| LIF        | leukemia inhibitory factor                                                         | 3976   | -1.627 | 8.44E-03 | -2.037 | 8.82E-03 |
| LINC0096 9 | long intergenic non-protein coding RNA 969                                         | 440993 | -2.047 | 4.30E-04 | -1.527 | 5.00E-05 |
| LOC34488 7 | NmrA-like family domain containing 1 pseudogene                                    | 344887 | -1.327 | 3.03E-02 | -1.764 | 2.78E-03 |
| LOC65434 2 | lymphocyte-specific protein 1 pseudogene                                           | 654342 | -1.975 | 4.07E-04 | -1.672 | 1.29E-03 |
| LOC65443 3 | uncharacterized LOC654433                                                          | 654433 | -1.784 | 5.36E-04 | -1.813 | 1.88E-03 |
| LPAR4      | lysophosphatidic acid receptor 4                                                   | 2846   | 2.009  | 1.35E-03 | 1.762  | 3.20E-03 |
| LPPR4      | lipid phosphate phosphatase-related protein type 4                                 | 9890   | -6.696 | 3.04E-03 | -4.406 | 7.10E-03 |
| LRRK2      | leucine-rich repeat kinase 2                                                       | 120892 | -1.847 | 1.38E-03 | -1.609 | 2.98E-03 |
| LRRN3      | leucine rich repeat neuronal 3                                                     | 54674  | -2.706 | 5.06E-05 | -2.092 | 7.35E-05 |
| LYPD6B     | LY6/PLAUR domain containing 6B                                                     | 130576 | -2.040 | 3.11E-05 | -2.251 | 9.34E-04 |
| MAPK10     | mitogen-activated protein kinase 10                                                | 5602   | -1.584 | 3.09E-03 | -2.106 | 5.38E-05 |
| MAPK13     | mitogen-activated protein kinase 13                                                | 5603   | 1.840  | 1.40E-05 | 1.855  | 1.16E-05 |
| MCM10      | minichromosome maintenance complex component 10                                    | 55388  | 1.563  | 3.84E-03 | 2.247  | 3.75E-04 |

|          |                                                                               |        |        |          |        |          |
|----------|-------------------------------------------------------------------------------|--------|--------|----------|--------|----------|
| MFAP4    | microfibrillar-associated protein 4                                           | 4239   | -2.299 | 3.96E-03 | -2.589 | 2.51E-03 |
| MFF      | mitochondrial fission factor                                                  | 56947  | -1.767 | 3.94E-04 | -1.628 | 6.67E-04 |
| MICU3    | mitochondrial calcium uptake family, member 3                                 | 286097 | -1.519 | 1.25E-04 | -1.681 | 5.57E-06 |
| MLF1IP   | MLF1 interacting protein                                                      | 79682  | 1.549  | 1.87E-03 | 3.172  | 5.69E-05 |
| MST4     | serine/threonine protein kinase MST4                                          | 51765  | 1.780  | 2.64E-02 | 2.141  | 9.92E-03 |
| MXRA5    | matrix-remodelling associated 5                                               | 25878  | -1.815 | 2.07E-03 | -7.209 | 4.11E-05 |
| MYBL2    | v-myb avian myeloblastosis viral oncogene homolog-like 2                      | 4605   | 1.638  | 1.12E-03 | 2.504  | 2.29E-04 |
| MYRIP    | myosin VIIA and Rab interacting protein                                       | 25924  | 1.896  | 5.44E-03 | 1.993  | 3.34E-03 |
| NCAPG    | non-SMC condensin I complex, subunit G                                        | 64151  | 1.872  | 4.65E-04 | 3.992  | 3.26E-05 |
| NCAPH    | non-SMC condensin I complex, subunit H                                        | 23397  | 1.977  | 3.62E-05 | 3.825  | 8.40E-08 |
| NDC80    | NDC80 kinetochore complex component                                           | 10403  | 1.871  | 6.13E-03 | 4.864  | 2.19E-04 |
| NEFM     | neurofilament, medium polypeptide                                             | 4741   | 1.594  | 2.99E-02 | 4.807  | 4.90E-04 |
| NEK2     | NIMA-related kinase 2                                                         | 4751   | 1.795  | 7.97E-04 | 4.810  | 3.05E-05 |
| NEO1     | neogenin 1                                                                    | 4756   | -1.620 | 1.07E-04 | -1.745 | 1.04E-05 |
| NETO1    | neuropilin (NRP) and tolloid (TLL)-like 1                                     | 81832  | -3.369 | 1.71E-03 | -3.335 | 1.35E-03 |
| NID2     | nidogen 2 (osteonidogen)                                                      | 22795  | -1.632 | 2.10E-04 | -2.465 | 1.52E-05 |
| NNAT     | neuronatin                                                                    | 4826   | 1.528  | 1.44E-03 | 1.764  | 1.02E-03 |
| NTNG1    | netrin G1                                                                     | 22854  | 2.166  | 7.41E-05 | 1.946  | 1.70E-04 |
| NUF2     | NUF2, NDC80 kinetochore complex component                                     | 83540  | 2.425  | 2.71E-04 | 6.099  | 2.17E-05 |
| OAS3     | 2'-5'-oligoadenylate synthetase 3, 100kDa                                     | 4940   | 1.823  | 4.34E-04 | 2.189  | 1.52E-04 |
| OLFML2B  | olfactomedin-like 2B                                                          | 25903  | 1.762  | 2.10E-03 | 4.822  | 2.02E-05 |
| P2RX5    | purinergic receptor P2X, ligand-gated ion channel, 5                          | 5026   | 2.242  | 9.13E-04 | 1.850  | 1.78E-03 |
| PAQR5    | progesterin and adipoQ receptor family member V                               | 54852  | -1.605 | 8.57E-03 | -2.610 | 5.00E-04 |
| PAX6     | paired box 6                                                                  | 5080   | 1.604  | 2.05E-03 | 3.476  | 4.98E-06 |
| PCDHB16  | protocadherin beta 16                                                         | 57717  | -1.949 | 5.45E-03 | -5.140 | 1.83E-04 |
| PCDHGA12 | protocadherin gamma subfamily A, 12                                           | 26025  | -2.388 | 1.48E-04 | -1.728 | 1.82E-03 |
| PCDHGA2  | protocadherin gamma subfamily A, 2                                            | 56113  | -1.529 | 6.74E-03 | -1.508 | 1.71E-04 |
| PCDHGA3  | protocadherin gamma subfamily A, 3                                            | 56112  | -2.642 | 2.05E-04 | -3.344 | 6.09E-05 |
| PCDHGA6  | protocadherin gamma subfamily A, 6                                            | 56109  | -1.603 | 5.13E-03 | -1.818 | 8.64E-03 |
| PCSK2    | proprotein convertase subtilisin/kexin type 2                                 | 5126   | -8.094 | 1.71E-04 | -1.797 | 4.86E-03 |
| PDPN     | podoplanin                                                                    | 10630  | 2.781  | 4.19E-04 | 2.998  | 2.77E-04 |
| PIR      | pirin (iron-binding nuclear protein)                                          | 8544   | -3.990 | 5.05E-05 | -2.800 | 1.03E-04 |
| PKN3     | protein kinase N3                                                             | 29941  | 1.558  | 1.65E-04 | 1.669  | 8.21E-06 |
| PLEKHG1  | pleckstrin homology domain containing, family G (with RhoGef domain) member 1 | 57480  | -1.685 | 2.62E-03 | -2.208 | 6.35E-04 |
| PLK1     | polo-like kinase 1                                                            | 5347   | 2.517  | 5.73E-03 | 6.442  | 4.78E-04 |
| PLK4     | polo-like kinase 4                                                            | 10733  | 1.610  | 5.01E-04 | 3.550  | 1.27E-05 |

|          |                                                                                               |        |        |          |        |          |
|----------|-----------------------------------------------------------------------------------------------|--------|--------|----------|--------|----------|
| PLXDC1   | plexin domain containing 1                                                                    | 57125  | 2.774  | 2.04E-05 | 3.712  | 1.69E-06 |
| PNPLA3   | patatin-like phospholipase domain containing 3                                                | 80339  | -1.875 | 3.34E-03 | -2.186 | 1.42E-03 |
| PPP2R1B  | protein phosphatase 2, regulatory subunit A, beta                                             | 5519   | -1.676 | 4.67E-04 | -1.747 | 1.45E-04 |
| PREX1    | phosphatidylinositol-3,4,5-trisphosphate-dependent Rac exchange factor 1                      | 57580  | 1.842  | 1.02E-04 | 1.644  | 7.03E-06 |
| PRRG4    | proline rich Gla (G-carboxyglutamic acid) 4 (transmembrane)                                   | 79056  | 1.786  | 2.70E-03 | 2.106  | 1.49E-03 |
| PTGES    | prostaglandin E synthase                                                                      | 9536   | -1.615 | 4.81E-03 | -1.747 | 2.02E-03 |
| PTN      | pleiotrophin                                                                                  | 5764   | -2.089 | 2.81E-03 | -2.951 | 6.16E-04 |
| PYROXD2  | pyridine nucleotide-disulphide oxidoreductase domain 2                                        | 84795  | -2.753 | 3.43E-03 | -1.888 | 6.70E-03 |
| RAB27B   | RAB27B, member RAS oncogene family                                                            | 5874   | -2.010 | 8.08E-03 | -2.014 | 8.36E-03 |
| RAD51AP1 | RAD51 associated protein 1                                                                    | 10635  | 1.577  | 2.04E-04 | 3.256  | 3.67E-06 |
| RASL11A  | RAS-like, family 11, member A                                                                 | 387496 | 1.502  | 4.02E-03 | 1.541  | 1.94E-03 |
| RBPM5    | RNA binding protein with multiple splicing 2                                                  | 348093 | 1.710  | 9.93E-04 | 1.697  | 6.56E-04 |
| RGS7     | regulator of G-protein signaling 7                                                            | 6000   | -2.527 | 1.79E-04 | -3.068 | 2.07E-04 |
| ROBO1    | roundabout, axon guidance receptor, homolog 1 (Drosophila)                                    | 6091   | -1.821 | 3.79E-03 | -1.635 | 7.86E-03 |
| ROBO2    | roundabout, axon guidance receptor, homolog 2 (Drosophila)                                    | 6092   | -2.149 | 7.63E-05 | -2.638 | 1.75E-04 |
| S1PR3    | sphingosine-1-phosphate receptor 3                                                            | 1903   | -1.756 | 8.36E-04 | -1.960 | 1.35E-04 |
| SAMD5    | sterile alpha motif domain containing 5                                                       | 389432 | -1.552 | 2.46E-03 | -2.026 | 4.55E-04 |
| SEL1L3   | sel-1 suppressor of lin-12-like 3 (C. elegans)                                                | 23231  | -2.135 | 4.24E-03 | -1.636 | 1.97E-02 |
| SETD9    | SET domain containing 9                                                                       | 133383 | 2.036  | 1.53E-03 | 1.599  | 3.25E-03 |
| SKA1     | spindle and kinetochore associated complex subunit 1                                          | 220134 | 1.795  | 6.56E-03 | 3.889  | 3.33E-04 |
| SLC16A7  | solute carrier family 16 (monocarboxylate transporter), member 7                              | 9194   | -1.638 | 2.80E-04 | -1.777 | 2.23E-04 |
| SLC16A9  | solute carrier family 16, member 9                                                            | 220963 | 1.640  | 6.76E-03 | 1.731  | 4.10E-03 |
| SLC19A3  | solute carrier family 19 (thiamine transporter), member 3                                     | 80704  | -1.778 | 1.02E-03 | -1.696 | 2.02E-03 |
| SLC2A13  | solute carrier family 2 (facilitated glucose transporter), member 13                          | 114134 | -2.183 | 3.17E-03 | -1.739 | 7.71E-03 |
| SLC35F2  | solute carrier family 35, member F2                                                           | 54733  | 2.100  | 1.06E-03 | 2.732  | 3.68E-04 |
| SLC39A6  | solute carrier family 39 (zinc transporter), member 6                                         | 25800  | -1.066 | 3.05E-03 | -1.251 | 1.19E-04 |
| SLC9A3R1 | solute carrier family 9, subfamily A (NHE3, cation proton antiporter 3), member 3 regulator 1 | 9368   | 1.580  | 1.32E-03 | 2.264  | 1.56E-04 |
| SMOC1    | SPARC related modular calcium binding 1                                                       | 64093  | 3.172  | 2.09E-03 | 3.304  | 1.94E-03 |
| SOD3     | superoxide dismutase 3, extracellular                                                         | 6649   | -1.767 | 4.10E-03 | -1.628 | 3.30E-03 |
| SOGA2    | SOGA family member 2                                                                          | 23255  | -1.621 | 1.47E-05 | -1.733 | 1.34E-05 |

|         |                                                                       |        |        |          |        |          |
|---------|-----------------------------------------------------------------------|--------|--------|----------|--------|----------|
| SPC25   | SPC25, NDC80 kinetochore complex component                            | 57405  | 1.658  | 3.48E-04 | 4.434  | 7.68E-06 |
| SPESP1  | sperm equatorial segment protein 1                                    | 246777 | -1.870 | 1.28E-04 | -2.696 | 2.57E-05 |
| SSTR1   | somatostatin receptor 1                                               | 6751   | -1.749 | 6.64E-03 | -2.313 | 1.36E-03 |
| STK32B  | serine/threonine kinase 32B                                           | 55351  | -1.597 | 2.14E-03 | -2.679 | 1.06E-04 |
| STMN2   | stathmin-like 2                                                       | 11075  | -5.099 | 6.27E-04 | -2.727 | 4.09E-03 |
| TACC3   | transforming, acidic coiled-coil containing protein 3                 | 10460  | 1.725  | 1.25E-03 | 2.994  | 6.22E-05 |
| TANC1   | tetratricopeptide repeat, ankyrin repeat and coiled-coil containing 1 | 85461  | -1.260 | 3.25E-02 | -1.678 | 1.42E-03 |
| TBL1X   | transducin (beta)-like 1X-linked                                      | 6907   | -1.615 | 6.63E-04 | -1.534 | 1.84E-04 |
| TCF19   | transcription factor 19                                               | 6941   | 1.570  | 3.56E-03 | 2.509  | 1.48E-04 |
| TFPI2   | tissue factor pathway inhibitor 2                                     | 7980   | -3.403 | 7.02E-04 | -2.034 | 1.17E-03 |
| TLR5    | toll-like receptor 5                                                  | 7100   | 1.589  | 9.22E-03 | 1.547  | 4.06E-03 |
| TMC7    | transmembrane channel-like 7                                          | 79905  | 1.982  | 2.04E-04 | 2.370  | 1.06E-04 |
| TMEM30B | transmembrane protein 30B                                             | 161291 | 1.856  | 3.73E-04 | 1.548  | 1.00E-03 |
| TNFAIP6 | tumor necrosis factor, alpha-induced protein 6                        | 7130   | -2.081 | 6.10E-04 | -1.613 | 3.28E-03 |
| TOX2    | TOX high mobility group box family member 2                           | 84969  | 1.720  | 2.54E-03 | 1.587  | 4.21E-04 |
| TRHDE   | thyrotropin-releasing hormone degrading enzyme                        | 29953  | -2.834 | 1.40E-04 | -2.086 | 3.39E-04 |
| TRIM59  | tripartite motif containing 59                                        | 286827 | 1.550  | 4.32E-03 | 2.597  | 8.34E-05 |
| TRPC4   | transient receptor potential cation channel, subfamily C, member 4    | 7223   | -3.557 | 6.01E-04 | -3.280 | 5.75E-04 |
| TSPAN12 | tetraspanin 12                                                        | 23554  | -2.791 | 3.87E-03 | -2.336 | 8.23E-03 |
| TTK     | TTK protein kinase                                                    | 7272   | 1.908  | 9.84E-04 | 5.246  | 3.01E-05 |
| UBE2T   | ubiquitin-conjugating enzyme E2T (putative)                           | 29089  | 1.521  | 2.49E-03 | 2.562  | 1.35E-04 |
| UHRF1   | ubiquitin-like with PHD and ring finger domains 1                     | 29128  | 1.588  | 1.58E-03 | 2.156  | 2.48E-04 |
| VEGFA   | vascular endothelial growth factor A                                  | 7422   | -1.514 | 2.38E-03 | -1.732 | 3.27E-04 |
| VSNL1   | visinin-like 1                                                        | 7447   | 1.705  | 2.90E-03 | 1.612  | 1.99E-03 |
| WDR63   | WD repeat domain 63                                                   | 126820 | -1.883 | 3.91E-03 | -1.789 | 4.50E-03 |
| WISP3   | WNT1 inducible signaling pathway protein 3                            | 8838   | 2.664  | 8.05E-05 | 2.659  | 2.04E-04 |
| WNT16   | wingless-type MMTV integration site family, member 16                 | 51384  | -2.716 | 3.22E-04 | -1.591 | 3.59E-03 |
| ZC3H12C | zinc finger CCCH-type containing 12C                                  | 85463  | -1.517 | 5.12E-03 | -1.915 | 2.25E-04 |
| ZNF780B | zinc finger protein 780B                                              | 163131 | -1.207 | 5.51E-02 | -1.333 | 3.02E-02 |
| ZNF804A | zinc finger protein 804A                                              | 91752  | -2.136 | 4.22E-03 | -1.787 | 5.35E-03 |
| ZRSR2   | zinc finger (CCCH type), RNA-binding motif and serine/arginine rich 2 | 8233   | -1.541 | 6.81E-03 | -1.504 | 3.03E-03 |
| ZSCAN31 | zinc finger and SCAN domain containing 31                             | 64288  | -1.631 | 2.40E-03 | -1.511 | 2.31E-03 |
| ZSWIM5  | zinc finger, SWIM-type containing 5                                   | 57643  | -1.870 | 2.72E-03 | -2.017 | 1.71E-03 |

**Supplementary Table 3. Biological functions and diseases predicted by Ingenuity Pathway Analysis based on the differentially expressed genes in HPAH and IPAH vs control.** The Biological Functional Analysis™ identified the biological functions and/or diseases that were most significant to the data set. The 227 selected genes in table 1 were associated with a biological function in the Ingenuity knowledge base were considered for analysis. Fischer's exact test was used to calculate a p-value determining the probability that each biological function and/or disease assigned to that data set is due to chance alone. The molecules involved in those biological functions were also listed in the table. The molecules involved in those biological functions were also listed in the table. The identity of those molecules can be retrieved from **Supplementary Table 2.**

| Category                            | p-value           | Molecules                                                                                                                                                                                                                                                                                                                                                                                                                                                                                                                                                                                                                                                                                                                                                                                                                                                                                                                                                                                                                                                                                                                                                                                                                        |
|-------------------------------------|-------------------|----------------------------------------------------------------------------------------------------------------------------------------------------------------------------------------------------------------------------------------------------------------------------------------------------------------------------------------------------------------------------------------------------------------------------------------------------------------------------------------------------------------------------------------------------------------------------------------------------------------------------------------------------------------------------------------------------------------------------------------------------------------------------------------------------------------------------------------------------------------------------------------------------------------------------------------------------------------------------------------------------------------------------------------------------------------------------------------------------------------------------------------------------------------------------------------------------------------------------------|
| Cancer                              | 3.08E-17-8.72E-03 | BMP4,HMMR,NCAPG,DOCK4,STK32B,CCNB2,CCL20,SEL1L3,MAPK13,VEGFA,CXCL10,CECR1,PLK4,EPHB1,ZC3H12C,MYRIP,CENPE,CTSH,KCNK1,EFHB,NEFM,ZNF780B,KNSTRN,ABCA6,AHR,ASF1B,IL4R,CCNE2,DAPK1,NETO1,TSPAN12,KRT23,SSTR1,EVI2A,L1CAM,TFPI2,CERS4,TANC1,ISLR,LRRN3,KRT19,HIST1H3A (includes others), FOXE1,VSNL1,ENC1,HDHD1,NID2,BDNF,PTN,BEX1,GDF15,ZNF804A,NUF2,TTK,HLA-DPA1,SOD3,ABCA9,KSR1,CGNL1,CDKN3,BDKRB2,ZRSR2,TRHDE,CCL28,DNAH5,MFF,FABP4,MCM10,GRIK2,ROBO2,SOGA2,DNER,SPC25,KLHL41,SLC39A6,MLF1IP,C2orf27A/C2orf27B,PLK1,MFAP4,CSGALNACT1,DSEL,OAS3,SLC16A9,CDK1,PLEKHG1,PTGES,KIF15,PCSK2,KIF20B,ANXA3,WISP3,WDR63,PAX6,ANO4,HIST1H2AG,PLXDC1,MXRA5,RAD51AP1,KIF23,LPAR4,LIF,ATP2B1,CDCP1,CD4,DNAJC6,LPPR4,CXCL12,WNT16,PCDHGA3,SLC16A7,ZSWIM5,FAM111B,NEO1,MYBL2,KDM5C,ADAMTS5,ESCO2,PCDHGA6,TNFAIP6,HIST1H4A,ANLN,INMT,BUB1B,TBL1X,FAM20A,APOBEC3G,KLHL4,MICU3,PREX1,GINS1,CST1,CD180,MAPK10,NDC80,CENPQ,HIST2H2AB,EREG,HIST1H2BH/HIST1H2BO,KIF11,CCDC146,PDPN,PCDHGA12,CDC20,STMN2,FLRT2,RAB27B,ROBO1,NTNG1,NEK2,ICAM2,PRRG4,TMC7,ASPM,KCNMA1,PNPLA3,TOX2,ADRB2,PAQR5,PCDHB16,TACC3,UHRF1,EDNRB,SLC9A3R1,SMOC1,RGS7,CPED1,ZSCAN31,LRRK2,PCDHGA2,IL1R1,CPA4,UBE2T,MST4,HIST2H2BE,ERG,CADM1,TLR5,OLFML2B,E2F7,A2M,DSG2,PPP2R1B,TRIM59 |
| Organismal Injury and Abnormalities | 4.75E-13-8.29E-03 | BMP4,LIF,CDCP1,CD4,HMMR,CXCL12,WNT16,CCNB2,SEL1L3,MAPK13,CXCL10,VEGFA,SLC16A7,EPHB1,CTSH,KCNK1,NEFM,MYBL2,ADAMTS5,AHR,ASF1B,CCNE2,IL4R,TNFAIP6,KRT23,SSTR1,L1CAM,BUB1B,TFPI2,TBL1X,APOBEC3G,S1PR3,GINS1,KRT19,MAPK10,KIF11,PDPN,CDC20,BDNF,FLRT2,GDF15,PTN,BEX1,TTK,ROBO1,SOD3,BDKRB2,ZRSR2,NEK2,KCNMA1,DNAH5,FABP4,MCM10,ROBO2,GRIK2,ADRB2,PCDHB16,SLC9A3R1,UHRF1,EDNRB,SPC25,SLC39A6,LRRK2,PLK1,MFAP4,C2orf27A/C2orf27B,IL1R1,CDK1,CADM1,HIST2H2BE,ERG,PTGES,TLR5,WISP3,ANXA3,MXRA5,PPP2R1B                                                                                                                                                                                                                                                                                                                                                                                                                                                                                                                                                                                                                                                                                                                                    |
| Cell Cycle                          | 9.67E-09-8.72E-03 | PDPN,KIF23,LIF,BMP4,CDC20,NCAPG,CD4,GDF15,PTN,CXCL12,CCNB2,NUF2,TTK,SKA1,CDKN3,VEGFA,CXCL10,PLK4,NEK2,CENPE,NCAPH,MCM10,HJURP,MYBL2,AHR,IQGAP3,DTL,ESCO2,TACC3,CCNE2,IL4R,UHRF1,ANLN,SPC25,SSTR1,PLK1,BUB1B,CDK1,MST4,KIF15,CD180,KRT19,KIF20B,E2F7,PAX6,NDC80,EREG,KIF11                                                                                                                                                                                                                                                                                                                                                                                                                                                                                                                                                                                                                                                                                                                                                                                                                                                                                                                                                        |
| Cellular Assembly and Organization  | 9.67E-09-8.09E-03 | KIF23,LPAR4,LIF,BMP4,ATP2B1,NCAPG,CXCL12,LPPR4,CCNB2,PCDHGA3,SKA1,CXCL10,VEGFA,EPHB1,PLK4,CENPE,NCAPH,NEFM,NEO1,AHR,DAPK1,PCDHGA6,ANLN,L1CAM,BUB1B,S1PR3,PR                                                                                                                                                                                                                                                                                                                                                                                                                                                                                                                                                                                                                                                                                                                                                                                                                                                                                                                                                                                                                                                                      |



|                                            |                   |                                                                                                                                                                                                                                                                                                                                                                                                                                                                                                                   |
|--------------------------------------------|-------------------|-------------------------------------------------------------------------------------------------------------------------------------------------------------------------------------------------------------------------------------------------------------------------------------------------------------------------------------------------------------------------------------------------------------------------------------------------------------------------------------------------------------------|
|                                            |                   | EX1,MAPK10,NDC80,ENC1,KIF11,PDPN,PCDHGA12,CDC20,STMN2,BDNF,RAB27B,GDF15,PTN,NUF2,TTK,ROBO1,NTNG1,NEK2,ICAM2,MFF,HJURP,ROBO2,ADRB2,TACC3,SLC9A3R1,DNER,KLHL41,SPC25,LRRK2,PCDHGA2,PLK1,IL1R1,CDK1,ERG,PCSK2,KIF20B,PAX6,A2M                                                                                                                                                                                                                                                                                        |
| DNA Replication, Recombination, and Repair | 9.67E-09-8.51E-03 | KIF23,LIF,BMP4,CDC20,BDNF,NCAPG,CD4,PTN,CXCL12,CCNB2,TTK,NUF2,SKA1,KSR1,CXCL10,VEGFA,NEK2,CENPE,NCAPH,MYBL2,HJURP,CCNE2,UHRF1,SPC25,PLK1,BUB1B,TFPI2,CDK1,CD180,NDC80,EREG,A2M,KIF11                                                                                                                                                                                                                                                                                                                              |
| Cell Death and Survival                    | 3.28E-08-7.9E-03  | BMP4,LIF,ATP2B1,CDCP1,CD4,HMMR,CXCL12,WNT16,MAPK13,PCDHGA3,SKA1,VEGFA,CXCL10,PLK4,NEFM,MYBL2,AHR,IL4R,DAPK1,PCDHGA6,ANLN,SSTR1,L1CAM,BUB1B,TFPI2,S1PR3,GINS1,KRT19,MAPK10,NDC80,VSNL1,ENC1,KIF11,HIST1H2BH/HIST1H2BO,PCDHGA12,CDC20,BDNF,GDF15,PTN,TTK,NUF2,SOD3,KSR1,BDKRB2,CDKN3,ICAM2,NEK2,KCNMA1,FABP4,MCM10,GRIK2,ATP6V1G2,ADRB2,DTL,TACC3,UHRF1,EDNRB,SPC25,LRRK2,PLK1,PCDHGA2,IL1R1,OAS3,CDK1,MST4,ERG,CADM1,PTGES,PCSK2,E2F7,PAX6,A2M,DSG2,PPP2R1B                                                        |
| Cellular Function and Maintenance          | 1.39E-07-8.09E-03 | KIF23,LIF,BMP4,ATP2B1,CD4,LPPR4,CXCL12,CCL20,CXCL10,VEGFA,EPHB1,PLK4,CENPE,KCNK1,NEFM,NEO1,AHR,DAPK1,L1CAM,S1PR3,PREX1,MAPK10,NDC80,ENC1,KIF11,PDPN,CDC20,STMN2,BDNF,PTN,TTK,ROBO1,BDKRB2,NTNG1,NEK2,KCNMA1,CCL28,MFF,GRIK2,ROBO2,ADRB2,TACC3,EDNRB,SLC9A3R1,DNER,SPC25,KLHL41,SLC39A6,TRPC4,PLK1,IL1R1,ERG,TLR5,KIF20B,PAX6,A2M,DSG2                                                                                                                                                                             |
| Cellular Movement                          | 1.61E-06-8.76E-03 | KIF23,LIF,BMP4,CDCP1,CD4,HMMR,CXCL12,CCL20,CCNB2,DOCK4,CXCL10,VEGFA,EPHB1,CTSH,NEO1,AHR,IL4R,ANLN,L1CAM,TFPI2,S1PR3,PREX1,KRT19,MAPK10,VSNL1,EREG,PDPN,CDC20,BDNF,FLRT2,GDF15,PTN,ROBO1,SOD3,BDKRB2,NEK2,ICAM2,KCNMA1,ASPM,DNAH5,CCL28,FABP4,ROBO2,DTL,ADRB2,SLC9A3R1,EDNRB,LRRK2,PLK1,IL1R1,CDK1,CADM1,ERG,PTGES,TLR5,KIF20B,ANXA3,PAX6,A2M                                                                                                                                                                      |
| Cell Morphology                            | 1.8E-06-8.09E-03  | KIF23,LPAR4,BMP4,LIF,CDCP1,NCAPG,CD4,LPPR4,CXCL12,VEGFA,CXCL10,PLK4,EPHB1,NEFM,NEO1,MYBL2,AHR,IQGAP3,IL4R,SSTR1,L1CAM,FAM20A,S1PR3,PREX1,CD180,FOXO1,ENC1,PDPN,CDC20,STMN2,BDNF,PTN,GDF15,ROBO1,KSR1,SPESP1,BDKRB2,NTNG1,ICAM2,KCNMA1,ROBO2,ADRB2,TACC3,EDNRB,SLC9A3R1,DNER,KLHL41,RGS7,LRRK2,PLK1,TRPC4,IL1R1,CDK1,CADM1,ERG,KIF15,PCSK2,TLR5,PAX6,A2M                                                                                                                                                           |
| Cellular Growth and Proliferation          | 2.78E-06-8.99E-03 | LIF,BMP4,CDCP1,CD4,NCAPG,HMMR,CXCL12,DOCK4,CCL20,CCNB2,WNT16,MAPK13,VEGFA,CXCL10,PLK4,EPHB1,NEO1,MYBL2,ADAMTS5,AHR,IL4R,DAPK1,CCNE2,TNFAIP6,KRT23,SSTR1,L1CAM,BUB1B,TFPI2,S1PR3,CD180,KRT19,MAPK10,EREG,ENC1,HIST1H2BH/HIST1H2BO,KIF11,PDPN,CDC20,NID2,BDNF,GDF15,PTN,TTK,ROBO1,KSR1,BDKRB2,CDKN3,C1QTNF3,NEK2,KCNMA1,FABP4,MCM10,GRIK2,ATP6V1G2,DTL,ADRB2,TACC3,EDNRB,UHRF1,SLC9A3R1,DNER,SLC39A6,LRRK2,TRPC4,PLK1,IL1R1,OAS3,CDK1,ERG,MST4,CADM1,PTGES,KIF15,PCSK2,TLR5,KIF20B,E2F7,TCF19,PAX6,A2M,DSG2,PPP2R1B |
| Cell-To-Cell Signaling and Interaction     | 5.06E-06-8.31E-03 | BMP4,LIF,PCDHGA12,CDCP1,BDNF,HMMR,CD4,GDF15,PTN,CXCL12,CCL20,PCDHGA3,SOD3,CXCL10,VEGFA,EPHB1,ICAM2,KCNMA1,CCL28,MYBL2,AHR,ADRB2,IL4R,PCDHGA6,PCDHGA2,L1CAM,IL1R1,TFPI2,ERG,CADM1,PTGES,PREX1,TLR5,VSNL1,A2M,DSG2                                                                                                                                                                                                                                                                                                  |

|                                                |                   |                                                                                                                                                                                                                                                                                                                                                                                                                                                                                         |
|------------------------------------------------|-------------------|-----------------------------------------------------------------------------------------------------------------------------------------------------------------------------------------------------------------------------------------------------------------------------------------------------------------------------------------------------------------------------------------------------------------------------------------------------------------------------------------|
| Cardiovascular System Development and Function | 7.91E-06-7.9E-03  | PDPN,BMP4,LIF,BDNF,FLRT2,HMMR,PTN,CXCL12,ROBO1,SOD3,VEGFA,CXCL10,BDKRB2,EPHB1,KCNMA1,CCL28,FABP4,AHR,ADRB2,IL4R,CCNE2,EDNRB,TSPAN12,LRRK2,TRPC4,L1CAM,IL1R1,ERG,S1PR3,PTGES,PCSK2,TLR5,E2F7,ANXA3,PAX6,EREG                                                                                                                                                                                                                                                                             |
| Cellular Development                           | 8.47E-06-8.99E-03 | KIF23,BMP4,LIF,CDCP1,HMMR,CD4,NCAPG,LPPR4,CXCL12,DOC K4,WNT16,CCNB2,CCL20,MAPK13,VEGFA,CXCL10,EPHB1,NEFM,NEO1,MYBL2,ADAMTS5,AHR,IL4R,CCNE2,DAPK1,TNFAIP6,HIST1H4A (includes others),SSTR1,L1CAM,TBL1X,TFPI2,S1PR3,PREX1,KRT19,ENC1,EREG,PDPN,STMN2,CDC20,NID2,BDNF,PTN,GDF15,ROBO1,KSR1,BDKRB2,NTNG1,C1QTNF3,ICAM2,NEK2,ASPM,KCNMA1,FABP4,ROBO2,ADRB2,DTL,TACC3,SLC9A3R1,UHRF1,EDNRB,DNER,KLHL41,SLC39A6,LRRK2,PLK1,TRPC4,IL1R1,OAS3,CDK1,CADM1,MST4,ERG,PTGES,PCSK2,TLR5,E2F7,PAX6,A2M |
| Metabolic Disease                              | 1.05E-05-7.9E-03  | BDNF,CD4,GDF15,HLA-DPA1,VEGFA,CXCL10,KCNK1,FABP4,ROBO2,ADRB2,SLC9A3R1,EDNRB,HIST1H4A,ZSCAN31,CMAHP,EVI2A,SSTR1,FRMD4B,L1CAM,IL1R1,HIST2H2BE (includes others),PCSK2,TLR5,CD180,HIST1H3A,MAPK10,PAX6,TCF19,A2M,CCDC68,HIST1H2BH/HIST1H2BO,KIF11                                                                                                                                                                                                                                          |
| Organismal Development                         | 1.74E-05-7.93E-03 | PDPN,LIF,BMP4,BDNF,FLRT2,PTN,CXCL12,ROBO1,VEGFA,BDKRB2,CXCL10,EPHB1,KCNMA1,CCL28,FABP4,ROBO2,AHR,ADRB2,CCNE2,IL4R,EDNRB,TSPAN12,DNER,LRRK2,L1CAM,TRPC4,CADM1,ERG,S1PR3,PTGES,KRT19,E2F7,ANXA3,PAX6,EREG                                                                                                                                                                                                                                                                                 |
| Tissue Development                             | 1.74E-05-8.09E-03 | KIF23,LPAR4,BMP4,LIF,CDCP1,HMMR,CD4,LPPR4,CXCL12,CCL20,PCDHGA3,CXCL10,VEGFA,EPHB1,NEFM,AHR,IL4R,PCDHGA6,L1CAM,BUB1B,TFPI2,S1PR3,PREX1,KRT19,VSNL1,ENC1,EREG,PDPN,PCDHGA12,CDC20,BDNF,RAB27B,GDF15,PTN,ROBO1,BDKRB2,NTNG1,ICAM2,KCNMA1,CCL28,FABP4,MCM10,ROBO2,ADRB2,EDNRB,DNER,LRRK2,PCDHGA2,TRPC4,PLK1,IL1R1,ERG,CADM1,PTGES,PAX6,A2M,DSG2                                                                                                                                             |
| Tissue Morphology                              | 1.23E-04-8.75E-03 | KIF23,LIF,BMP4,CD4,CXCL12,CCNB2,CCL20,MAPK13,CXCL10,VEGFA,EPHB1,PLK4,CTSH,NEFM,NEO1,MYBL2,AHR,IL4R,SSTR1,L1CAM,FAM20A,S1PR3,PREX1,CD180,KRT19,MAPK10,PDPN,CD20,BDNF,FLRT2,GDF15,PTN,ROBO1,SOD3,KSR1,BDKRB2,CCL28,ROBO2,ADRB2,TACC3,EDNRB,SLC9A3R1,UHRF1,DNER,RGS7,LRRK2,IL1R1,CADM1,PTGES,KIF15,PCSK2,TLR5,KIF20B,E2F7,PAX6                                                                                                                                                             |
| Embryonic Development                          | 1.29E-04-7.93E-03 | PDPN,BMP4,LIF,BDNF,PTN,CXCL12,DOCK4,CCL20,ROBO1,KSR1,CXCL10,VEGFA,BDKRB2,C1QTNF3,EPHB1,MYBL2,ROBO2,AHR,ADRB2,DAPK1,EDNRB,DNER,LRRK2,PLK1,L1CAM,MST4,CADM1,PTGES,KRT19,PAX6,A2M,ENC1,EREG                                                                                                                                                                                                                                                                                                |
| Inflammatory Response                          | 1.33E-04-8.75E-03 | PDPN,LIF,CD4,GDF15,PTN,CXCL12,CCL20,SOD3,VEGFA,CXCL10,C1QTNF3,ICAM2,CCL28,FABP4,NEO1,AHR,ADRB2,IL4R,EDNRB,TNFAIP6,LRRK2,IL1R1,S1PR3,PTGES,PREX1,TLR5,ANXA3,A2M                                                                                                                                                                                                                                                                                                                          |
| Cellular Compromise                            | 1.57E-04-6.09E-03 | BDKRB2,LPAR4,EPHB1,LIF,BDNF,CXCL12,NEO1,LRRK2,L1CAM                                                                                                                                                                                                                                                                                                                                                                                                                                     |
| Immune Cell Trafficking                        | 2.17E-04-7.9E-03  | PDPN,IL4R,LIF,EDNRB,CD4,PTN,CXCL12,CCL20,LRRK2,L1CAM,IL1R1,SOD3,ERG,VEGFA,S1PR3,CXCL10,PTGES,PREX1,ICAM2,TLR5,CCL28,MAPK10,FABP4,NEO1,A2M,AHR,ADRB2                                                                                                                                                                                                                                                                                                                                     |
| Post-Translational Modification                | 2.73E-04-2.73E-04 | DAPK1,BMP4,EDNRB,CD4,PTN,LRRK2,PLK1,MAPK13,CDK1,MST4,ERG,VEGFA,PLK4,EPHB1,LRRN3,NEK2,FAM129A,MAPK10,PKN3,EREG,AHR,IQGAP3                                                                                                                                                                                                                                                                                                                                                                |
| Cell Signaling                                 | 5.12E-04-8.09E-03 | NNAT,LPAR4,BMP4,LIF,ATP2B1,BDNF,CD4,C1QTNF1,CXCL12,CCL20,MAPK13,KSR1,BDKRB2,VEGFA,CXCL10,CCL28,FABP4,AH                                                                                                                                                                                                                                                                                                                                                                                 |

|                                             |                   |                                                                                                                                                                                                                       |
|---------------------------------------------|-------------------|-----------------------------------------------------------------------------------------------------------------------------------------------------------------------------------------------------------------------|
|                                             |                   | R,ADRB2,DAPK1,SLC9A3R1,EDNRB,RGS7,LRRK2,TRPC4,L1CAM,S1PR3,CD180,A2M                                                                                                                                                   |
| Respiratory System Development and Function | 8.03E-04-1.19E-03 | PDPN,VEGFA,BMP4,LIF,ROBO1                                                                                                                                                                                             |
| Lipid Metabolism                            | 9.43E-04-6.35E-03 | PDPN,IL4R,BMP4,HOMER2,LIF,EDNRB,BDNF,CD4,C1QTNF1,GDF15,CXCL12,IL1R1,CERS4,CADM1,BDKRB2,CXCL10,VEGFA,S1PR3,C1QTNF3,PTGES,MAPK10,FABP4,PNPLA3,AHR,ADRB2                                                                 |
| Small Molecule Biochemistry                 | 9.43E-04-8.09E-03 | PDPN,LPAR4,LIF,BMP4,HOMER2,BDNF,CD4,C1QTNF1,GDF15,CXCL12,BDKRB2,CXCL10,VEGFA,C1QTNF3,FABP4,PNPLA3,AHR,ADRB2,IL4R,TNFAIP6,EDNRB,IL1R1,CERS4,CADM1,S1PR3,PTGES,PCSK2,MAPK10,PAX6,FOXO1                                  |
| Connective Tissue Development and Function  | 1.26E-03-7.9E-03  | VEGFA,PDPN,PTGES,IL4R,LIF,FLRT2,GDF15,IL1R1,ADRB2                                                                                                                                                                     |
| Connective Tissue Disorders                 | 1.26E-03-6.58E-03 | BMP4,BDNF,CD4,HMMR,CXCL12,CCL20,ROBO1,HLA-DPA1,SOD3,KSR1,VEGFA,CXCL10,FABP4,ADAMTS5,AHR,ADRB2,IL4R,TNFAIP6,EDNRB,ZSCAN31,LRRK2,L1CAM,IL1R1,CSGALNACT1,TFPI2,ERG,CD180                                                 |
| Hypersensitivity Response                   | 1.26E-03-7.88E-03 | VEGFA,CXCL10,IL4R,ICAM2,CCL28,CD4,CXCL12,FABP4                                                                                                                                                                        |
| Molecular Transport                         | 1.35E-03-8.5E-03  | NNAT,DAPK1,LPAR4,EDNRB,SLC9A3R1,ATP2B1,BDNF,CD4,RGS7,CXCL12,CCL20,L1CAM,TRPC4,IL1R1,CERS4,CXCL10,VEGFA,S1PR3,BDKRB2,PTGES,CD180,CCL28,FABP4,A2M,AHR,ADRB2                                                             |
| Carbohydrate Metabolism                     | 1.66E-03-4.56E-03 | VEGFA,CXCL10,TNFAIP6,CD4                                                                                                                                                                                              |
| Cardiovascular Disease                      | 1.88E-03-4.41E-03 | VEGFA,TNFAIP6,AHR,ADRB2                                                                                                                                                                                               |
| Respiratory Disease                         | 2.13E-03-7.89E-03 | LIF,CDC20,NID2,CD4,CXCL12,CCNB2,ROBO1,VEGFA,ICAM2,TRHDE,CCL28,NEO1,AHR,IL4R,EDNRB,TNFAIP6,RGS7,PCDHGA2,L1CAM,PLK1,IL1R1,BUB1B,CDK1,CERS4,HIST2H2BE (includes others),PTGES,PCSK2,TLR5,KRT19,ANXA3,MXRA5,PPP2R1B,KIF11 |
| Cell-mediated Immune Response               | 2.61E-03-7.93E-03 | CXCL10,LIF,TLR5,CD4,CCL28,CXCL12,CCL20,IL1R1,AHR                                                                                                                                                                      |
| Inflammatory Disease                        | 2.97E-03-7.89E-03 | BMP4,BDNF,CD4,HMMR,CXCL12,CCL20,ROBO1,HLA-DPA1,SOD3,KSR1,VEGFA,CXCL10,CCL28,FABP4,ADAMTS5,AHR,ADRB2,IL4R,TNFAIP6,EDNRB,ZSCAN31,LRRK2,L1CAM,IL1R1,CSGALNACT1,TFPI2,ERG,CD180                                           |
| Skeletal and Muscular Disorders             | 2.97E-03-6.58E-03 | BMP4,BDNF,CD4,HMMR,CXCL12,CCL20,ROBO1,HLA-DPA1,SOD3,KSR1,VEGFA,CXCL10,NEFM,FABP4,ADAMTS5,AHR,ADRB2,IL4R,TNFAIP6,EDNRB,ZSCAN31,LRRK2,L1CAM,IL1R1,CSGALNACT1,TFPI2,ERG,CD180                                            |
| Hereditary Disorder                         | 3.12E-03-7.9E-03  | IL4R,SLC9A3R1,KCNK1,KRT19,SSTR1                                                                                                                                                                                       |

**Supplementary Table 4. Canonical signal transduction pathways predicted by Ingenuity Pathway Analysis based on the differentially expressed genes in HPAH and IPAH vs control.**

Canonical pathways analysis identified the pathways from the Ingenuity Pathways Analysis™ library of canonical pathways that were most significant to the dataset. The 227 selected genes in table 1 were associated with a canonical pathway in the Ingenuity knowledge base were considered for analysis. The significance of the association between the dataset and the canonical pathway was determined as a p-value calculated by Fisher's exact test, a measure of the probability that the association between the proteins in the dataset and the canonical pathway is taking place by chance alone. The ratio is calculated as follows: number of genes in a given pathway that meet the cutoff criteria, divided by the total number of genes that make up that pathway and that are in the reference gene set. The molecules involved in those biological pathways were also listed in the table. The identity of those molecules can be retrieved from **Supplementary Table 2**.

| <b>Ingenuity Canonical Pathways</b>                        | <b>-log (p-value)</b> | <b>Ratio</b> | <b>Molecules</b>                               |
|------------------------------------------------------------|-----------------------|--------------|------------------------------------------------|
| Mitotic Roles of Polo-Like Kinase                          | 6.04E00               | 1.08E-01     | KIF23,PLK4,CDC20,CCNB2,PLK1,PPP2R1B,CDK1,KIF11 |
| Salvage Pathways of Pyrimidine Ribonucleotides             | 3.12E00               | 5.31E-02     | DAPK1,NEK2,PLK1,TTK,CDK1,APOBEC3G              |
| DNA damage-induced 14-3-3σ Signaling                       | 2.91E00               | 1.36E-01     | CCNE2,CCNB2,CDK1                               |
| IL-6 Signaling                                             | 2.67E00               | 4.84E-02     | VEGFA,TNFAIP6,MAPK10,MAPK13,IL1R1,A2M          |
| ATM Signaling                                              | 2.32E00               | 6.06E-02     | MAPK10,CCNB2,MAPK13,CDK1                       |
| Inhibition of Angiogenesis by TSP1                         | 2.17E00               | 7.14E-02     | VEGFA,MAPK10,MAPK13                            |
| Cyclins and Cell Cycle Regulation                          | 1.88E00               | 4.17E-02     | CCNE2,CCNB2,PPP2R1B,CDK1                       |
| Cell Cycle: G2/M DNA Damage Checkpoint Regulation          | 1.86E00               | 6.12E-02     | CCNB2,PLK1,CDK1                                |
| GADD45 Signaling                                           | 1.67E00               | 8.33E-02     | CCNE2,CDK1                                     |
| Role of CHK Proteins in Cell Cycle Checkpoint Control      | 1.61E00               | 5.08E-02     | PLK1,PPP2R1B,CDK1                              |
| IL-22 Signaling                                            | 1.52E00               | 8E-02        | MAPK10,MAPK13                                  |
| Estrogen-mediated S-phase Entry                            | 1.52E00               | 7.14E-02     | CCNE2,CDK1                                     |
| Role of JAK family kinases in IL-6-type Cytokine Signaling | 1.49E00               | 7.14E-02     | MAPK10,MAPK13                                  |
| IL-17A Signaling in Airway Cells                           | 1.44E00               | 3.95E-02     | MAPK10,CCL20,MAPK13                            |
| IL-10 Signaling                                            | 1.37E00               | 3.85E-02     | IL4R,MAPK13,IL1R1                              |
| IL-17 Signaling                                            | 1.31E00               | 4E-02        | CXCL10,MAPK10,MAPK13                           |
| BMP signaling pathway                                      | 1.25E00               | 3.49E-02     | BMP4,MAPK10,MAPK13                             |
| Coagulation System                                         | 1.22E00               | 5.26E-02     | BDKRB2,A2M                                     |
| Cell Cycle Regulation by BTG Family Proteins               | 1.22E00               | 5.13E-02     | CCNE2,PPP2R1B                                  |
| Ceramide Signaling                                         | 1.2E00                | 3.3E-02      | S1PR3,PPP2R1B,KSR1                             |
| Superoxide Radicals Degradation                            | 1.18E00               | 1.25E-01     | SOD3                                           |

|                                                                                |          |          |                               |
|--------------------------------------------------------------------------------|----------|----------|-------------------------------|
| Inhibition of Matrix Metalloproteases                                          | 1.14E00  | 5E-02    | A2M,TFPI2                     |
| ErbB Signaling                                                                 | 1.14E00  | 3.33E-02 | MAPK10,MAPK13,EREG            |
| HMGB1 Signaling                                                                | 1.05E00  | 2.75E-02 | MAPK10,MAPK13,IL1R1           |
| IL-1 Signaling                                                                 | 1.05E00  | 2.75E-02 | MAPK10,MAPK13,IL1R1           |
| Prostanoid Biosynthesis                                                        | 1.01E00  | 6.67E-02 | PTGES                         |
| Calcium Transport I                                                            | 9.66E-01 | 7.14E-02 | ATP2B1                        |
| Cdc42 Signaling                                                                | 9.5E-01  | 2.15E-02 | MAPK10,MAPK13,HLA-DPA1,IQGAP3 |
| HIF1 $\alpha$ Signaling                                                        | 9.46E-01 | 2.68E-02 | VEGFA,MAPK10,MAPK13           |
| Type I Diabetes Mellitus Signaling                                             | 9.01E-01 | 2.48E-02 | MAPK10,MAPK13,IL1R1           |
| Endothelin-1 Signaling                                                         | 8.74E-01 | 2.08E-02 | EDNRB,MAPK10,PNPLA3,MAPK13    |
| Toll-like Receptor Signaling                                                   | 8.74E-01 | 3.12E-02 | TLR5,MAPK13                   |
| Corticotropin Releasing Hormone Signaling                                      | 8.59E-01 | 2.07E-02 | VEGFA,BDNF,MAPK13             |
| Glutamate Receptor Signaling                                                   | 8.38E-01 | 2.78E-02 | HOMER2,GRIK2                  |
| CD40 Signaling                                                                 | 7.93E-01 | 2.82E-02 | MAPK10,MAPK13                 |
| Eicosanoid Signaling                                                           | 7.93E-01 | 2.33E-02 | PTGES,PNPLA3                  |
| Adenosine Nucleotides Degradation II                                           | 7.52E-01 | 3.57E-02 | CECR1                         |
| Chemokine Signaling                                                            | 7.32E-01 | 2.67E-02 | CXCL12,MAPK13                 |
| eNOS Signaling                                                                 | 7.26E-01 | 1.94E-02 | VEGFA,BDKRB2,LPAR4            |
| PEDF Signaling                                                                 | 7.13E-01 | 2.53E-02 | BDNF,MAPK13                   |
| Cardiomyocyte Differentiation via BMP Receptors                                | 7.09E-01 | 4.55E-02 | BMP4                          |
| AMPK Signaling                                                                 | 7E-01    | 1.66E-02 | MAPK13,PPP2R1B,ADRB2          |
| LPS-stimulated MAPK Signaling                                                  | 6.95E-01 | 2.41E-02 | MAPK10,MAPK13                 |
| Basal Cell Carcinoma Signaling                                                 | 6.95E-01 | 2.56E-02 | BMP4,WNT16                    |
| STAT3 Pathway                                                                  | 6.95E-01 | 2.5E-02  | MAPK10,MAPK13                 |
| Purine Nucleotides Degradation II (Aerobic)                                    | 6.89E-01 | 2.7E-02  | CECR1                         |
| Ephrin B Signaling                                                             | 6.86E-01 | 2.44E-02 | EPHB1,CXCL12                  |
| CXCR4 Signaling                                                                | 5.97E-01 | 1.72E-02 | CD4,CXCL12,MAPK10             |
| RANK Signaling in Osteoclasts                                                  | 5.84E-01 | 2.06E-02 | MAPK10,MAPK13                 |
| TGF- $\beta$ Signaling                                                         | 5.84E-01 | 2.13E-02 | BMP4,MAPK13                   |
| CDK5 Signaling                                                                 | 5.77E-01 | 2.06E-02 | BDNF,PPP2R1B                  |
| Role of Macrophages, Fibroblasts and Endothelial Cells in Rheumatoid Arthritis | 5.72E-01 | 1.46E-02 | VEGFA,TLR5,CXCL12,WNT16,IL1R1 |
| Factors Promoting Cardiogenesis in Vertebrates                                 | 5.7E-01  | 2.02E-02 | CCNE2,BMP4                    |
| Bladder Cancer Signaling                                                       | 5.7E-01  | 2.06E-02 | VEGFA,DAPK1                   |
| Acute Phase Response Signaling                                                 | 5.19E-01 | 1.66E-02 | MAPK13,IL1R1,A2M              |
| NF- $\kappa$ B Signaling                                                       | 5.02E-01 | 1.66E-02 | BMP4,TLR5,IL1R1               |
| Paxillin Signaling                                                             | 4.95E-01 | 1.71E-02 | MAPK10,MAPK13                 |
| Nitric Oxide Signaling in the Cardiovascular System                            | 4.95E-01 | 1.6E-02  | VEGFA,BDKRB2                  |

|                                                                       |          |          |                         |
|-----------------------------------------------------------------------|----------|----------|-------------------------|
| Ephrin Receptor Signaling                                             | 4.93E-01 | 1.43E-02 | VEGFA,EPHB1,CXCL12      |
| RAR Activation                                                        | 4.85E-01 | 1.54E-02 | VEGFA,MAPK10,MAPK13     |
| Sertoli Cell-Sertoli Cell Junction Signaling                          | 4.85E-01 | 1.52E-02 | MAPK10,MAPK13,A2M       |
| Production of Nitric Oxide and Reactive Oxygen Species in Macrophages | 4.77E-01 | 1.42E-02 | MAPK10,MAPK13,PPP2R1B   |
| NRF2-mediated Oxidative Stress Response                               | 4.73E-01 | 1.54E-02 | DNAJC6,ENC1,SOD3        |
| Role of NFAT in Cardiac Hypertrophy                                   | 4.65E-01 | 1.44E-02 | LIF,MAPK10,MAPK13       |
| Glucocorticoid Receptor Signaling                                     | 4.6E-01  | 1.34E-02 | MAPK10,MAPK13,A2M,ADRB2 |
| Fc Epsilon RI Signaling                                               | 4.52E-01 | 1.71E-02 | MAPK10,MAPK13           |
| Renin-Angiotensin Signaling                                           | 4.52E-01 | 1.59E-02 | MAPK10,MAPK13           |
| ILK Signaling                                                         | 4.45E-01 | 1.46E-02 | VEGFA,MAPK10,PPP2R1B    |
| Role of Tissue Factor in Cancer                                       | 4.42E-01 | 1.54E-02 | VEGFA,MAPK13            |
| Xenobiotic Metabolism Signaling                                       | 4.29E-01 | 1.39E-02 | MAPK13,PPP2R1B,AHR,SOD3 |
| Breast Cancer Regulation by Stathmin1                                 | 4.23E-01 | 1.4E-02  | CCNE2,PPP2R1B,CDK1      |
| Gα12/13 Signaling                                                     | 4.09E-01 | 1.57E-02 | LPAR4,MAPK10            |
| RhoA Signaling                                                        | 4.09E-01 | 1.63E-02 | LPAR4,ANLN              |
| p38 MAPK Signaling                                                    | 4.09E-01 | 1.67E-02 | MAPK13,IL1R1            |
| Leukocyte Extravasation Signaling                                     | 4.06E-01 | 1.43E-02 | CXCL12,MAPK10,MAPK13    |

**Supplementary Table 5. The list of genes predicted by Ingenuity Pathway Analysis that increase or affect cell proliferation.** The identity of those molecules can be retrieved from **Supplementary Table 2.**

|          | <b>Prediction on expression direction)</b> | <b>Fold Change (HPAH)</b> | <b>Fold Change (IPAH)</b> | <b>Findings</b> |
|----------|--------------------------------------------|---------------------------|---------------------------|-----------------|
| ADAMTS5  | Increased                                  | -1.695                    | -2.536                    | Decreases (1)   |
| ATP2B1   | Increased                                  | -1.874                    | -1.640                    | Decreases (1)   |
| B4GALT6  | Increased                                  | 1.705                     | 2.149                     | Increases (1)   |
| BUB1     | Increased                                  | 2.360                     | 6.424                     | Increases (3)   |
| CCNB1    | Increased                                  | 1.704                     | 4.284                     | Increases (1)   |
| CCNE2    | Increased                                  | 1.668                     | 2.081                     | Increases (1)   |
| CDC20    | Increased                                  | 2.702                     | 7.124                     | Increases (1)   |
| CDK1     | Increased                                  | 1.969                     | 4.674                     | Increases (6)   |
| CENPF    | Increased                                  | 1.829                     | 4.382                     | Increases (1)   |
| CXCL10   | Increased                                  | -2.297                    | -2.052                    | Decreases (11)  |
| DLGAP5   | Increased                                  | 2.786                     | 7.634                     | Increases (6)   |
| DOCK4    | Increased                                  | -1.731                    | -1.754                    | Decreases (1)   |
| DTL      | Increased                                  | 1.574                     | 2.382                     | Increases (1)   |
| EPHB1    | Increased                                  | 1.677                     | 1.761                     | Increases (1)   |
| ERG      | Increased                                  | 8.491                     | 6.342                     | Increases (3)   |
| FOXM1    | Increased                                  | 1.673                     | 4.489                     | Increases (35)  |
| GDF15    | Increased                                  | -1.996                    | -1.920                    | Decreases (14)  |
| ITGB8    | Increased                                  | -1.551                    | -1.846                    | Decreases (8)   |
| KCNMA1   | Increased                                  | 2.060                     | 1.844                     | Increases (1)   |
| KIAA0101 | Increased                                  | 1.675                     | 3.402                     | Increases (3)   |
| KIF11    | Increased                                  | 2.007                     | 4.085                     | Increases (1)   |
| KIF20A   | Increased                                  | 3.060                     | 8.925                     | Increases (1)   |
| KIF20B   | Increased                                  | 1.837                     | 4.078                     | Increases (1)   |
| KIF2C    | Increased                                  | 1.510                     | 3.792                     | Increases (2)   |
| KSR1     | Increased                                  | -1.605                    | -2.433                    | Decreases (13)  |
| MAPK13   | Increased                                  | 1.827                     | 1.870                     | Increases (1)   |
| MCM10    | Increased                                  | 1.551                     | 2.262                     | Increases (1)   |
| MET      | Increased                                  | 1.523                     | 1.969                     | Increases (84)  |
| MKI67    | Increased                                  | 2.042                     | 3.972                     | Increases (9)   |
| MST4     | Increased                                  | 1.769                     | 2.160                     | Increases (10)  |
| MYBL2    | Increased                                  | 1.627                     | 2.524                     | Increases (12)  |
| NCAPG    | Increased                                  | 1.859                     | 4.022                     | Increases (4)   |
| NEK2     | Increased                                  | 1.784                     | 4.850                     | Increases (3)   |
| NRCAM    | Increased                                  | 3.520                     | 1.617                     | Increases (1)   |
| PBK      | Increased                                  | 2.008                     | 5.324                     | Increases (1)   |
| PCSK2    | Increased                                  | -8.144                    | -1.782                    | Decreases (1)   |
| PEG10    | Increased                                  | 1.701                     | 2.427                     | Increases (3)   |
| PLK1     | Increased                                  | 2.502                     | 6.501                     | Increases (17)  |
| PPP2R1B  | Increased                                  | -1.687                    | -1.733                    | Decreases (11)  |
| PRKAR2B  | Increased                                  | -1.803                    | -2.048                    | Decreases (19)  |
| ROBO1    | Increased                                  | -1.835                    | -1.625                    | Decreases (1)   |
| RRM2     | Increased                                  | 2.032                     | 3.741                     | Increases (14)  |

|           |           |        |        |               |
|-----------|-----------|--------|--------|---------------|
| SPRY1     | Increased | -1.828 | -1.643 | Decreases (3) |
| SSTR1     | Increased | -1.763 | -2.298 | Decreases (3) |
| STC1      | Increased | -1.768 | -1.837 | Decreases (1) |
| TFPI2     | Increased | -3.429 | -2.020 | Decreases (5) |
| TLR5      | Increased | 1.579  | 1.560  | Increases (4) |
| TOP2A     | Increased | 1.570  | 3.493  | Increases (2) |
| TPX2      | Increased | 1.664  | 3.565  | Increases (5) |
| TTK       | Increased | 1.895  | 5.289  | Increases (1) |
| UHRF1     | Increased | 1.576  | 2.171  | Increases (4) |
| ADRB2     | Affected  | 2.074  | 2.208  | Affects (2)   |
| BDKRB2    | Affected  | -1.619 | -1.857 | Affects (3)   |
| BUB1B     | Affected  | 2.000  | 4.990  | Affects (1)   |
| CADM1     | Affected  | 1.829  | 1.919  | Affects (1)   |
| CD4       | Affected  | -3.205 | -1.987 | Affects (16)  |
| CDC25C    | Affected  | 1.618  | 4.164  | Affects (1)   |
| CDCP1     | Affected  | 1.654  | 2.358  | Affects (4)   |
| DAPK1     | Affected  | 3.104  | 1.544  | Affects (1)   |
| DNER      | Affected  | -2.782 | -1.565 | Affects (1)   |
| ENC1      | Affected  | -2.242 | -2.150 | Affects (5)   |
| HIST1H2BH | Affected  | 1.856  | 3.023  | Affects (1)   |
| IL1R1     | Affected  | -1.515 | -2.086 | Affects (9)   |
| KIF15     | Affected  | 1.550  | 3.242  | Affects (1)   |
| KRT19     | Affected  | 2.635  | 3.145  | Affects (2)   |
| PDPN      | Affected  | 2.764  | 3.024  | Affects (1)   |
| PLK4      | Affected  | 1.599  | 3.578  | Affects (2)   |
| TACC3     | Affected  | 1.713  | 3.018  | Affects (2)   |
| TCF19     | Affected  | 1.559  | 2.527  | Affects (1)   |
| WNT16     | Affected  | -2.735 | -1.579 | Affects (1)   |



**Supplementary Table 6. The downstream genes regulated by p53, Rb, FoxM1 and Myc which displayed differentiated expressional changes in HPAH and IPAH samples**

**Downstream genes regulated by p53**

| Symbol | Entrez Gene Name                                                                   | Entrez Gene ID | Fold Change (HPAH) | p-value (HPAH) | Fold Change (IPA H) | p-value (IPA H) |
|--------|------------------------------------------------------------------------------------|----------------|--------------------|----------------|---------------------|-----------------|
| A2M    | alpha-2-macroglobulin                                                              | 2              | -2.014             | 1.10E-03       | -1.809              | 1.44E-03        |
| ADRB2  | adrenoceptor beta 2, surface                                                       | 154            | 2.089              | 2.18E-04       | 2.191               | 1.48E-04        |
| ANLN   | anillin, actin binding protein                                                     | 54443          | 2.356              | 8.74E-03       | 5.827               | 6.49E-04        |
| ANXA3  | annexin A3                                                                         | 306            | 2.044              | 2.31E-04       | 4.137               | 7.40E-05        |
| ASF1B  | anti-silencing function 1B histone chaperone                                       | 55723          | 1.576              | 3.70E-03       | 2.973               | 4.00E-05        |
| ASPM   | asp (abnormal spindle) homolog, microcephaly associated (Drosophila)               | 259266         | 2.308              | 9.73E-03       | 5.434               | 7.92E-04        |
| BDKRB2 | bradykinin receptor B2                                                             | 624            | -1.607             | 9.36E-03       | -1.871              | 5.29E-03        |
| BUB1B  | BUB1 mitotic checkpoint serine/threonine kinase B                                  | 701            | 2.013              | 3.45E-04       | 4.950               | 1.29E-05        |
| CCNB2  | cyclin B2                                                                          | 9133           | 1.986              | 9.20E-03       | 5.419               | 4.72E-04        |
| CCNE2  | cyclin E2                                                                          | 9134           | 1.681              | 4.13E-03       | 2.066               | 6.67E-04        |
| CDC20  | cell division cycle 20                                                             | 991            | 2.717              | 4.02E-03       | 7.059               | 3.05E-04        |
| CDK1   | cyclin-dependent kinase 1                                                          | 983            | 1.981              | 3.75E-03       | 4.634               | 1.86E-04        |
| CDKN3  | cyclin-dependent kinase inhibitor 3                                                | 1033           | 2.134              | 2.51E-02       | 5.987               | 1.50E-03        |
| CTSH   | cathepsin H                                                                        | 1512           | 3.570              | 1.48E-04       | 2.252               | 7.90E-04        |
| DAPK1  | death-associated protein kinase 1                                                  | 1612           | 3.125              | 1.55E-04       | 1.532               | 2.49E-03        |
| FABP4  | fatty acid binding protein 4, adipocyte                                            | 2167           | -4.565             | 7.90E-03       | -5.134              | 5.25E-03        |
| FANCI  | Fanconi anemia, complementation group I                                            | 55215          | 1.522              | 3.42E-04       | 2.489               | 2.69E-05        |
| FLRT2  | fibronectin leucine rich transmembrane protein 2                                   | 23768          | -2.573             | 6.22E-05       | -1.820              | 2.28E-04        |
| GDF15  | growth differentiation factor 15                                                   | 9518           | -1.981             | 3.31E-04       | -1.933              | 5.68E-04        |
| HJURP  | Holliday junction recognition protein                                              | 55355          | 1.534              | 5.00E-03       | 4.005               | 7.13E-05        |
| HMMR   | hyaluronan-mediated motility receptor (RHAMM)                                      | 3161           | 2.538              | 3.22E-03       | 6.795               | 2.25E-04        |
| IL4R   | interleukin 4 receptor                                                             | 3566           | -1.723             | 1.85E-03       | -1.846              | 6.41E-04        |
| KCNMA1 | potassium large conductance calcium-activated channel, subfamily M, alpha member 1 | 3778           | 2.076              | 4.58E-04       | 1.831               | 8.60E-04        |
| KIF23  | kinesin family member 23                                                           | 9493           | 1.576              | 4.07E-04       | 2.318               | 3.79E-05        |
| KSR1   | kinase suppressor of ras 1                                                         | 8844           | -1.594             | 6.41E-04       | -2.452              | 1.23E-04        |
| LIF    | leukemia inhibitory factor                                                         | 3976           | -1.627             | 8.44E-03       | -2.037              | 8.82E-03        |
| MYBL2  | v-myb avian myeloblastosis viral oncogene homolog-like 2                           | 4605           | 1.638              | 1.12E-03       | 2.504               | 2.29E-04        |

|          |                                                            |       |        |          |        |          |
|----------|------------------------------------------------------------|-------|--------|----------|--------|----------|
| NCAPG    | non-SMC condensin I complex, subunit G                     | 64151 | 1.872  | 4.65E-04 | 3.992  | 3.26E-05 |
| NCAPH    | non-SMC condensin I complex, subunit H                     | 23397 | 1.977  | 3.62E-05 | 3.825  | 8.40E-08 |
| NDC80    | NDC80 kinetochore complex component                        | 10403 | 1.871  | 6.13E-03 | 4.864  | 2.19E-04 |
| NEK2     | NIMA-related kinase 2                                      | 4751  | 1.795  | 7.97E-04 | 4.810  | 3.05E-05 |
| NEO1     | neogenin 1                                                 | 4756  | -1.620 | 1.07E-04 | -1.745 | 1.04E-05 |
| NID2     | nidogen 2 (osteonidogen)                                   | 22795 | -1.632 | 2.10E-04 | -2.465 | 1.52E-05 |
| PLK1     | polo-like kinase 1                                         | 5347  | 2.517  | 5.73E-03 | 6.442  | 4.78E-04 |
| RAD51AP1 | RAD51 associated protein 1                                 | 10635 | 1.577  | 2.04E-04 | 3.256  | 3.67E-06 |
| ROBO1    | roundabout, axon guidance receptor, homolog 1 (Drosophila) | 6091  | -1.821 | 3.79E-03 | -1.635 | 7.86E-03 |
| SPC25    | SPC25, NDC80 kinetochore complex component                 | 57405 | 1.658  | 3.48E-04 | 4.434  | 7.68E-06 |
| TBL1X    | transducin (beta)-like 1X-linked                           | 6907  | -1.615 | 6.63E-04 | -1.534 | 1.84E-04 |
| TFPI2    | tissue factor pathway inhibitor 2                          | 7980  | -3.403 | 7.02E-04 | -2.034 | 1.17E-03 |
| TP53     | tumor protein p53                                          | --    |        |          |        |          |
| TTK      | TTK protein kinase                                         | 7272  | 1.908  | 9.84E-04 | 5.246  | 3.01E-05 |
| UBE2T    | ubiquitin-conjugating enzyme E2T (putative)                | 29089 | 1.521  | 2.49E-03 | 2.562  | 1.35E-04 |
| UHRF1    | ubiquitin-like with PHD and ring finger domains 1          | 29128 | 1.588  | 1.58E-03 | 2.156  | 2.48E-04 |
| VEGFA    | vascular endothelial growth factor A                       | 7422  | -1.514 | 2.38E-03 | -1.732 | 3.27E-04 |

### **Downstream genes regulated by Rb**

| Symbol    | Entrez Gene Name                                | Entrez Gene ID | Fold Change (HPAH) | p-value (HPAH) | Fold Change (IPAH) | p-value (IPAH) |
|-----------|-------------------------------------------------|----------------|--------------------|----------------|--------------------|----------------|
| ASF1B     | anti-silencing function 1B histone chaperone    | 55723          | 1.576              | 3.70E-03       | 2.973              | 4.00E-05       |
| CCNE2     | cyclin E2                                       | 9134           | 1.681              | 4.13E-03       | 2.066              | 6.67E-04       |
| CDK1      | cyclin-dependent kinase 1                       | 983            | 1.981              | 3.75E-03       | 4.634              | 1.86E-04       |
| CPA4      | carboxypeptidase A4                             | 51200          | 2.566              | 5.88E-03       | 2.399              | 7.65E-03       |
| FABP4     | fatty acid binding protein 4, adipocyte         | 2167           | -4.565             | 7.90E-03       | -5.134             | 5.25E-03       |
| HIST1H4A  | histone cluster 1, H4a                          | 8364           | 1.815              | 8.69E-04       | 2.878              | 1.40E-04       |
| HIST2H2BE | histone cluster 2, H2be                         | 8344           | 1.508              | 1.62E-03       | 2.372              | 7.45E-05       |
| KCNK1     | potassium channel, subfamily K, member 1        | 3775           | 1.555              | 8.82E-04       | 1.662              | 2.49E-04       |
| MCM10     | minichromosome maintenance complex component 10 | 55388          | 1.563              | 3.84E-03       | 2.247              | 3.75E-04       |

|          |                                                          |       |        |          |        |          |
|----------|----------------------------------------------------------|-------|--------|----------|--------|----------|
| MYBL2    | v-myb avian myeloblastosis viral oncogene homolog-like 2 | 4605  | 1.638  | 1.12E-03 | 2.504  | 2.29E-04 |
| NEFM     | neurofilament, medium polypeptide                        | 4741  | 1.594  | 2.99E-02 | 4.807  | 4.90E-04 |
| PLK1     | polo-like kinase 1                                       | 5347  | 2.517  | 5.73E-03 | 6.442  | 4.78E-04 |
| RAD51AP1 | RAD51 associated protein 1                               | 10635 | 1.577  | 2.04E-04 | 3.256  | 3.67E-06 |
| TCF19    | transcription factor 19                                  | 6941  | 1.570  | 3.56E-03 | 2.509  | 1.48E-04 |
| VEGFA    | vascular endothelial growth factor A                     | 7422  | -1.514 | 2.38E-03 | -1.732 | 3.27E-04 |

### **Downstream molecules regulated by Myc**

| Symbol                     | Entrez Gene Name                                  | Entrez Gene ID | Fold Change (HPAH) | p-value (HPAH) | Fold Change (IPAH) | p-value (IPAH) |
|----------------------------|---------------------------------------------------|----------------|--------------------|----------------|--------------------|----------------|
| BDNF                       | brain-derived neurotrophic factor                 | 627            | -2.078             | 1.29E-03       | -2.561             | 2.20E-04       |
| BUB1B                      | BUB1 mitotic checkpoint serine/threonine kinase B | 701            | 2.013              | 3.45E-04       | 4.950              | 1.29E-05       |
| CCNB2                      | cyclin B2                                         | 9133           | 1.986              | 9.20E-03       | 5.419              | 4.72E-04       |
| CCNE2                      | cyclin E2                                         | 9134           | 1.681              | 4.13E-03       | 2.066              | 6.67E-04       |
| CDC20                      | cell division cycle 20                            | 991            | 2.717              | 4.02E-03       | 7.059              | 3.05E-04       |
| CDK1                       | cyclin-dependent kinase 1                         | 983            | 1.981              | 3.75E-03       | 4.634              | 1.86E-04       |
| CXCL10                     | chemokine (C-X-C motif) ligand 10                 | 3627           | -2.279             | 6.46E-05       | -2.067             | 3.17E-04       |
| FABP4                      | fatty acid binding protein 4, adipocyte           | 2167           | -4.565             | 7.90E-03       | -5.134             | 5.25E-03       |
| FAM129A                    | family with sequence similarity 129, member A     | 116496         | 1.500              | 3.46E-04       | 1.889              | 3.29E-05       |
| HIST1H4A (includes others) | --                                                | 8364           | 1.815              | 8.69E-04       | 2.878              | 1.40E-04       |
| PLK1                       | polo-like kinase 1                                | 5347           | 2.517              | 5.73E-03       | 6.442              | 4.78E-04       |
| PTN                        | pleiotrophin                                      | 5764           | -2.089             | 2.81E-03       | -2.951             | 6.16E-04       |
| VEGFA                      | vascular endothelial growth factor A              | 7422           | -1.514             | 2.38E-03       | -1.732             | 3.27E-04       |

### **Downstream molecules regulated by FoxM1**

| Symbol | Entrez Gene Name                                  | Entrez Gene ID | Fold Change (HPAH) | p-value (HPAH) | Fold Change (IPAH) | p-value (IPAH) |
|--------|---------------------------------------------------|----------------|--------------------|----------------|--------------------|----------------|
|        |                                                   |                |                    |                |                    |                |
| BUB1B  | BUB1 mitotic checkpoint serine/threonine kinase B | 701            | 2.013              | 3.45E-04       | 4.950              | 1.29E-05       |
| CCNB2  | cyclin B2                                         | 9133           | 1.986              | 9.20E-03       | 5.419              | 4.72E-04       |
| CCNE2  | cyclin E2                                         | 9134           | 1.681              | 4.13E-03       | 2.066              | 6.67E-04       |
| CDC20  | cell division cycle 20                            | 991            | 2.717              | 4.02E-03       | 7.059              | 3.05E-04       |

|       |                                      |       |        |          |        |          |
|-------|--------------------------------------|-------|--------|----------|--------|----------|
| CDK1  | cyclin-dependent kinase 1            | 983   | 1.981  | 3.75E-03 | 4.634  | 1.86E-04 |
| CDKN3 | cyclin-dependent kinase inhibitor 3  | 1033  | 2.134  | 2.51E-02 | 5.987  | 1.50E-03 |
| NEK2  | --                                   | 4751  | 1.795  | 7.97E-04 | 4.810  | 3.05E-05 |
| PLK1  | polo-like kinase 1                   | 5347  | 2.517  | 5.73E-03 | 6.442  | 4.78E-04 |
| PLK4  | polo-like kinase 4                   | 10733 | 1.610  | 5.01E-04 | 3.550  | 1.27E-05 |
| VEGFA | vascular endothelial growth factor A | 7422  | -1.514 | 2.38E-03 | -1.732 | 3.27E-04 |
